# Supplementary material for: Rhodium-catalyzed regioselective C–H activation/Lossen rearrangement/annulation for the green synthesis of trisubstituted 2-pyridones
Source: Royal Society of Chemistry journal article supplement (doi:10.1039/d3qo00469d), 2023-01-01

## Supporting Information

### Rhodium-catalyzed Regioselective C-H Activation/Lossen Rearrangement/Annulation for the Green Synthesis of Trisubstituted 2-Pyridones

Yidi Li,<sup>a,e,#</sup> Huiying Xu,<sup>c,#</sup> Lin Huang,<sup>d,b,#</sup> Zhi Zhou,<sup>\*,c</sup> Zhenhao Tang,<sup>b</sup> Haifang Meng,<sup>b</sup> Wei Zhang,<sup>b</sup>  
Wei Yi<sup>\*,c</sup> and Xiaowei Wu<sup>\*,a,b,d,e</sup>

<sup>a</sup>*Drug Discovery and Development Center, Shanghai Institute of Materia Medica, Chinese Academy of Sciences, Shanghai 201203, China*

<sup>b</sup>*Zhongshan Institute for Drug Discovery, Shanghai Institute of Materia Medica, Chinese Academy of Sciences, Zhongshan 528400, China*

<sup>c</sup>*Guangzhou Municipal and Guangdong Provincial Key Laboratory of Protein Modification and Degradation & Molecular Target and Clinical Pharmacology, State Key Laboratory of Respiratory Disease, School of Pharmaceutical Sciences & the Fifth Affiliated Hospital, Guangzhou Medical University, Guangzhou, Guangdong 511436, China*

<sup>d</sup>*School of Pharmaceutical Sciences, Southern Medical University, Guangzhou 510515, China*

<sup>e</sup>*University of Chinese Academy of Sciences, No.19A Yuquan Road, Beijing 100049, China*

|                                                                                     |    |
|-------------------------------------------------------------------------------------|----|
| General Information.....                                                            | 2  |
| Preparation of Starting Materials .....                                             | 2  |
| General Procedure for the Synthesis of Products <b>3</b> .....                      | 8  |
| Characterization Data of Products <b>3</b> .....                                    | 8  |
| Scale-up Experiments .....                                                          | 19 |
| Control Experiments .....                                                           | 19 |
| NOESY Experiments for Product <b>4a</b> , <b>4a'</b> , <b>5a</b> , <b>5a'</b> ..... | 21 |
| Mechanistic Experiments.....                                                        | 24 |
| Catalyst Recycling Experiments .....                                                | 27 |
| X-ray data of compound <b>3c</b> and <b>3w</b> .....                                | 28 |
| Computational Mechanistic Studies.....                                              | 30 |
| References.....                                                                     | 82 |
| Copies of <sup>1</sup> H, <sup>13</sup> C NMR and <sup>19</sup> F NMR spectra.....  | 84 |

## General Information

The chemical reagents were purchased from commercial sources and used directly without purification. Analytical thin-layer chromatography (TLC): HSGF 254 (0.15-0.2 mm thickness). Detection was conducted under UV light at 254 nm. Preparative thin layer chromatography was HSGF 254 (0.4-0.5 mm thickness). Yields refer to isolated compounds.  $^1\text{H}$ ,  $^{13}\text{C}$ , and  $^{19}\text{F}$  NMR spectra were collected on a Bruker 500 MHz instrument in chloroform-*d* or DMSO-*d*<sub>6</sub>. Chemical shifts ( $\delta$ ) are expressed as parts per million (ppm). Proton coupling patterns were recorded as singlet (s), broad (br), doublet (d), triplet (t), quartet (q), and multiplet (m). HRMS (high-resolution mass) were measured on a spectrometer with an electrospray ionization (ESI) source.

## Preparation of Starting Materials

General procedure A for the preparation of **1a**, **1y**, **1z**, **1za**, **1zb**.<sup>1</sup>

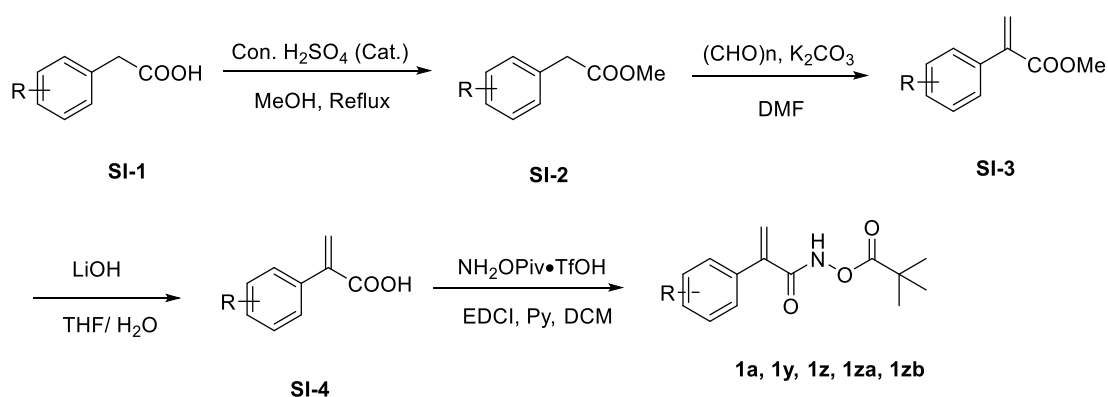

**Step 1:** To a solution of aryl acetic acids **SI-1** (7.3 mmol) in MeOH (20 mL), some drops of concentrated sulfuric acid were added. The reaction was refluxed for 8 hours, then it was cooled to room temperature. The solvent was concentrated under reduced pressure, and the residue was dissolved in EtOAc (30 mL), washed with H<sub>2</sub>O (30 mL) and brine (30 mL), dried with Na<sub>2</sub>SO<sub>4</sub>, filtered, and concentrated under reduced pressure. The crude product was used for the next step without further purification.

**Step 2:** A mixture of ester **SI-2** (7.0 mmol), paraformaldehyde (1.5 eq) and K<sub>2</sub>CO<sub>3</sub> (1 eq) in DMF (10 mL) was heated at 80°C for 1-3 h. The mixture was cooled to room temperature, water (30 mL) and Et<sub>2</sub>O (30 mL) were added, and the organic layer was separated. The collected organic layers were washed with brine (10 mL), dried with Na<sub>2</sub>SO<sub>4</sub> and concentrated under reduced pressure. The

resulting crude product was purified by column chromatography eluting with PE/EtOAc from 50:1 to 20:1.

**Step 3:** A 50 mL RBF was charged with methyl acrylate **SI-3** (7.0 mmol), LiOH (5 eq) and THF/H<sub>2</sub>O (1:1, 0.25 M) sequentially. The reaction flask was subjected to an 80°C preheated oil bath and stirred overnight, at which time the resulting mixture was cooled to room temperature and extracted with Et<sub>2</sub>O. The aqueous phase was acidified with 2N HCl and extracted with EtOAc (30 mL x 2). The combined organic layers were concentrated under vacuum. The crude product was used for the next step without further purification.

**Step 4:** To a solution of acrylic acid **SI-4** (2.0 mmol) in DCM (20 mL) was added pyridine (7.1 eq), EDCI (2eq) and NH<sub>2</sub>OPiv.TfOH (1.2 eq), and stirred at room temperature overnight. The mixture was washed with 2N HCl (20 mL), saturated aq. NaHCO<sub>3</sub> (20 mL) and brine (20 mL), dried over Na<sub>2</sub>SO<sub>4</sub> and concentrated under reduced pressure to give the crude products, which was purified by column chromatography eluting with PE/EtOAc from 20:1 to 5:1.

#### Characterization Data of **1zb**

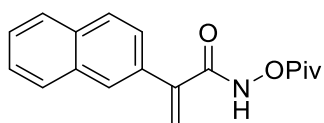

**2-(naphthalen-2-yl)-N-(pivaloyloxy)acrylamide:** white solid (867 mg, yield 40%); <sup>1</sup>H NMR (500 MHz, Chloroform-*d*) δ 8.48 (s, 1H), 7.97 – 7.81 (m, 3H), 7.60 – 7.40 (m, 4H), 6.81 (d, *J* = 1.7 Hz, 1H), 5.77 (d, *J* = 1.7 Hz, 1H), 1.27 (s, 9H).

General procedure B for the preparation of **2w**<sup>2</sup>

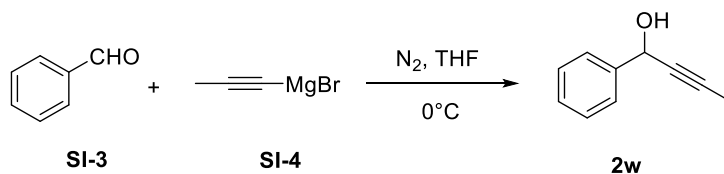

To a solution of benzaldehyde (1.06g, 0.01 mol) in 20 mL THF, propynylmagnesium bromide (22 mL, 0.011 mol, 0.5M in THF) was added dropwise while stirring at 0°C. It was allowed to warm up to room temperature and then stirred overnight. Reaction mixture was quenched with 10 mL water at 0°C and then treated with saturated brine followed by extraction with ether. The ether extract was dried with anhydrous sodium sulfate, evaporated and then purified by column chromatography (10%

ethyl acetate/hexane).

General procedure C for the preparation of **2a-2v** and **2x-2zb**<sup>3</sup>

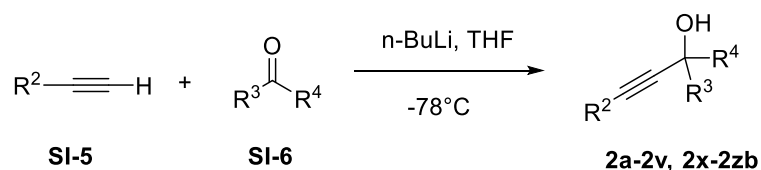

To a solution of alkyne (3.9 mmol) in anhydrous THF (5 mL) at -78 °C under N<sub>2</sub> atmosphere was added *n*-BuLi (1.6 M solution in hexanes, 2.06 mL, 3.3 mmol). The reaction was stirred at this temperature for 20 min then at room temperature for 1h. After cooling to -78 °C, aldehyde (3 mmol) was added to the mixture and was allowed to warm up to room temperature gradually and stirred for an additional hour before quenched with aqueous NH<sub>4</sub>Cl. The mixture was extracted with EtOAc (30 x 2 mL), and the combined organic phases were washed with water and brine, dried with anhydrous MgSO<sub>4</sub>, and filtered. The filtrate was concentrated under reduced pressure and the residue was purified by flash chromatography on silica gel (hexanes/ethyl acetate, v/v, 15:1) to produce the desired product.

Characterization Data of **2h**, **2i**, **2j**, **2k**, **2l**, **2n**

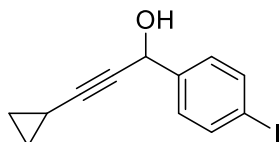

**3-cyclopropyl-1-(4-iodophenyl)prop-2-yn-1-ol (2h)**: yellow liquid (626 mg, yield 70%); <sup>1</sup>H NMR (500 MHz, DMSO-*d*<sub>6</sub>) δ 7.78 – 7.59 (m, 2H), 7.31 – 7.06 (m, 2H), 5.92 (d, *J* = 5.5 Hz, 1H), 5.40 – 4.99 (m, 1H), 1.34 (m, 1H), 0.85 – 0.72 (m, 2H), 0.58 (m, 2H).

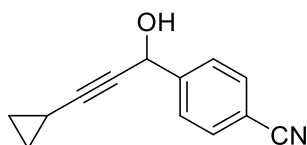

**4-(3-cyclopropyl-1-hydroxyprop-2-yn-1-yl)benzonitrile (2i)**: yellow liquid (372 mg, yield 63%); <sup>1</sup>H NMR (500 MHz, DMSO-*d*<sub>6</sub>) δ 7.91 – 7.74 (m, 2H), 7.67 – 7.44 (m, 2H), 6.12 (d, *J* = 5.6 Hz, 1H), 5.39 (dd, *J* = 5.8, 1.9 Hz, 1H), 1.35 (m, 1H), 0.81 – 0.72 (m, 2H), 0.64 – 0.52 (m, 2H).

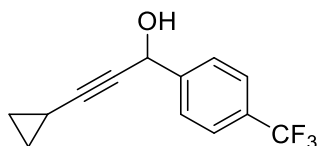

**3-cyclopropyl-1-(4-(trifluoromethyl)phenyl)prop-2-yn-1-ol (2j):** yellow liquid (439 mg, yield 61%);  $^1\text{H NMR}$  (500 MHz,  $\text{DMSO-}d_6$ )  $\delta$  7.72 (d,  $J = 8.2$  Hz, 2H), 7.64 (d,  $J = 8.1$  Hz, 2H), 6.08 (d,  $J = 5.9$  Hz, 1H), 5.53 – 5.17 (m, 1H), 1.40 – 1.27 (m, 1H), 0.83 – 0.69 (m, 2H), 0.67 – 0.41 (m, 2H).

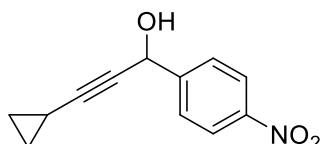

**3-cyclopropyl-1-(4-nitrophenyl)prop-2-yn-1-ol (2k):** yellow liquid (456 mg, yield 70%);  $^1\text{H NMR}$  (500 MHz,  $\text{DMSO-}d_6$ )  $\delta$  8.26 – 8.15 (m, 2H), 7.76 – 7.42 (m, 2H), 6.20 (d,  $J = 5.9$  Hz, 1H), 5.46 (dd,  $J = 5.9, 1.8$  Hz, 1H), 1.41 – 1.25 (m, 1H), 0.83 – 0.69 (m, 2H), 0.65 – 0.53 (m, 2H).

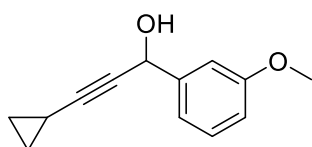

**3-cyclopropyl-1-(3-methoxyphenyl)prop-2-yn-1-ol (2l):** yellow liquid (545 mg, yield 90%);  $^1\text{H NMR}$  (500 MHz,  $\text{DMSO-}d_6$ )  $\delta$  7.26 (t,  $J = 7.9$  Hz, 1H), 7.09 – 6.95 (m, 2H), 6.90 – 6.73 (m, 1H), 5.84 (d,  $J = 6.0$  Hz, 1H), 5.27 (dd,  $J = 6.1, 1.8$  Hz, 1H), 3.75 (s, 3H), 1.34 (m, 1H), 0.84 – 0.72 (m, 2H), 0.65 – 0.50 (m, 2H).

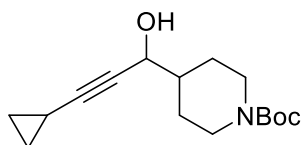

**tert-butyl 4-(3-cyclopropyl-1-hydroxyprop-2-yn-1-yl)piperidine-1-carboxylate (2n):** yellow liquid (670 mg, yield 80%);  $^1\text{H NMR}$  (500 MHz,  $\text{DMSO-}d_6$ )  $\delta$  5.18 (s, 1H), 3.95 (m, 3H), 1.69 – 1.61 (m, 2H), 1.50 (m, 1H), 1.38 (d,  $J = 2.2$  Hz, 9H), 1.30 – 0.98 (m, 5H), 0.77 – 0.71 (m, 2H), 0.57 – 0.50 (m, 2H).

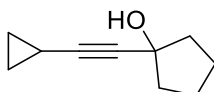

**1-(cyclopropylethynyl)cyclopentan-1-ol (2t):** yellow liquid (337 mg, yield 75%);  $^1\text{H NMR}$  (500 MHz,  $\text{DMSO-}d_6$ )  $\delta$  4.96 (s, 1H), 1.82 – 1.50 (m, 8H), 1.34 – 1.14 (m, 1H), 0.79 – 0.63 (m, 2H), 0.52 (m, 2H).

General procedure D for the preparation of **2a-1**<sup>4</sup>

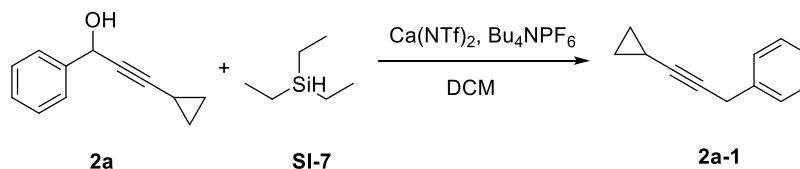

3-Cyclopropyl-1-phenylprop-2-yn-1-ol **2a** (0.5 mmol) and triethylsilane (1.5 mmol) are dissolved in 1 ml of DCM. Additive (5 mol%) and  $\text{Ca}(\text{NTf}_2)_2$  (5 mol%) are added at room temperature and stirred until complete conversion of the alcohol (monitored by TLC). Next, 5 mL sat.  $\text{NaHCO}_3$ -solution is added to the reaction mixture, the aqueous phase extracted with dichloromethane, the combined organic phases dried over  $\text{Na}_2\text{SO}_4$  and concentrated under vacuum. The crude product is purified by column chromatography.

General procedure E for the preparation of **2a-2**<sup>5</sup>

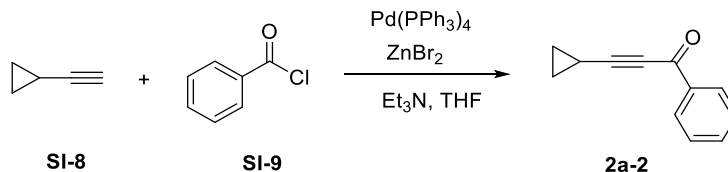

A mixture of  $\text{ZnBr}_2$  (1.2 mmol) in  $\text{Et}_3\text{N}$  (202 mg, 2 mmol) was stirred for 10 mins at room temperature. The reaction mixture was then successively treated with alkyne (1 mmol),  $\text{Pd}(\text{PPh}_3)_4$  (6 mg, 0.5 mmol %) and acyl chloride (1 mmol), stirred for 30 mins at room temperature, diluted with  $\text{Et}_2\text{O}$ , washed with aqueous  $\text{NH}_4\text{Cl}$  and then with aqueous  $\text{NaHCO}_3$ , dried over  $\text{MgSO}_4$ , filtered, and concentrated under vacuum to give the product which was further purified by column chromatography using hexane/ $\text{EtOAc}$  (20:1) as eluents.

Preparation of **1a-D**<sup>1</sup>

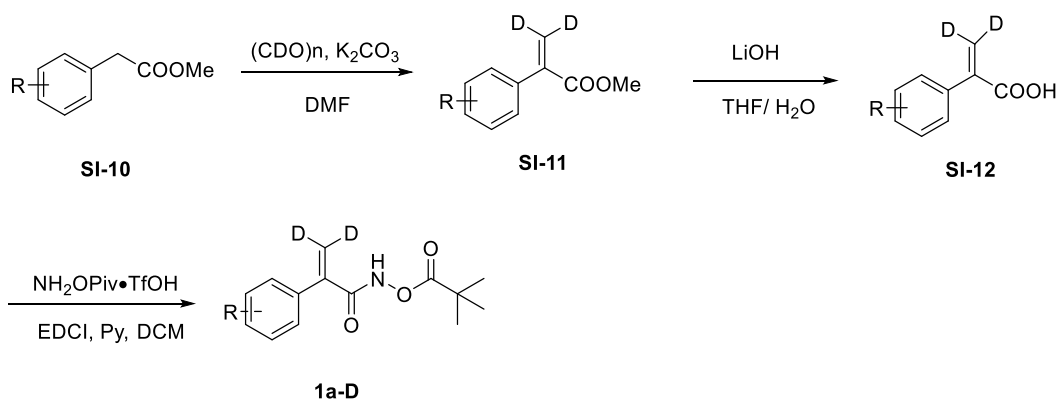

**Step 1:** A mixture of ester **SI-10** (7.0 mmol), D-paraformaldehyde (1.5 eq) and  $\text{K}_2\text{CO}_3$  (1 eq) in DMF (10 mL) was heated at  $80^\circ\text{C}$  for 1-3 h. The mixture was cooled at room temperature, water (30 mL) and  $\text{Et}_2\text{O}$  (30 mL) were added, and the organic layer was separated. The collected organic layers were washed with brine (10 mL), dried with  $\text{Na}_2\text{SO}_4$  and concentrated under reduced pressure. The resulting crude product was purified by column chromatography eluting with PE/EtOAc from 50:1 to 20:1.

**Step 2:** A 50 mL RBF was charged with methyl acrylate **SI-11** (7.0 mmol), LiOH (5 eq) and THF/ $\text{H}_2\text{O}$  (1:1, 0.25 M) sequentially. The reaction flask was subjected to an  $80^\circ\text{C}$  preheated oil bath and stirred overnight, at which time the resulting mixture was cooled to room temperature and extracted with  $\text{Et}_2\text{O}$ . The aqueous phase was acidified with 2N HCl and extracted with EtOAc (30 mL x 2). The combined organic layers were concentrated under vacuum. The crude product was used for the next step without further purification.

**Step 3:** To a solution of acrylic acid **SI-12** (2.0 mmol) in DCM (20 mL) was added pyridine (7.1 eq), EDCI (2eq) and  $\text{NH}_2\text{OPiv}\cdot\text{TfOH}$  (1.2 eq), and stirred at room temperature overnight. The mixture was washed with 2N HCl (20 mL), saturated aq.  $\text{NaHCO}_3$  (20 mL) and brine (20 mL), dried over  $\text{Na}_2\text{SO}_4$  and concentrated under reduced pressure to give the crude product, which was purified by column chromatography eluting with PE/EtOAc from 20:1 to 5:1.

## General Procedure for the Synthesis of Products 3

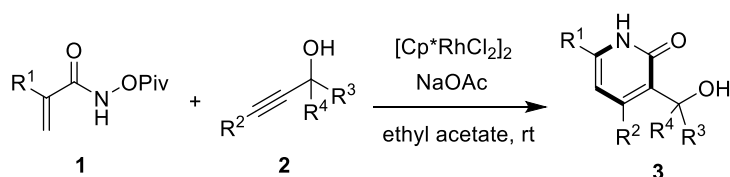

In an 8 mL reaction tube, the mixture of **1** (0.25 mmol), **2** (0.3 mmol), [Cp\*RhCl<sub>2</sub>]<sub>2</sub> (4.0 mol%) and NaOAc (1.0 eq.) was added EA (1.0 mL). Then the resulting mixture was stirred for 6 ~ 12 h. When the reaction was finished, the desired product precipitated out as a solid, and the product was simply collected by filtration. For some cases, if the precipitation did not occur, the reaction mixture was subjected directly to flash chromatography on silica gel (dichloromethane/methanol) to provide the desired products **3**.

## Characterization Data of Products 3

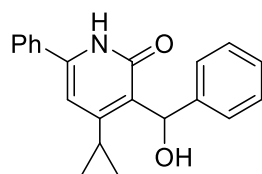

**4-cyclopropyl-3-(hydroxy(phenyl)methyl)-6-phenylpyridin-2(1H)-one (3a)**: white solid (58mg, yield 73%), <sup>1</sup>H NMR (500 MHz, DMSO-*d*<sub>6</sub>) δ 7.75 (dd, *J* = 7.5, 2.1 Hz, 2H), 7.49 – 7.38 (m, 5H), 7.29 (t, *J* = 7.6 Hz, 2H), 7.18 (t, *J* = 7.3 Hz, 1H), 6.23 (s, 1H), 5.98 (s, 1H), 2.23 (m, 1H), 0.90 (m, 2H), 0.80 (m, 1H), 0.72 (m, 1H). <sup>13</sup>C NMR (126 MHz, DMSO-*d*<sub>6</sub>) δ 175.04, 146.04, 130.12, 129.63, 129.03, 128.29, 127.28, 126.68, 126.18, 100.95, 69.11, 25.52, 12.55, 9.61, 9.08; HRMS (ESI) *m/z* calculated for C<sub>21</sub>H<sub>20</sub>NO<sub>2</sub><sup>+</sup> [M+H]<sup>+</sup> 318.1489, found: 318.1489.

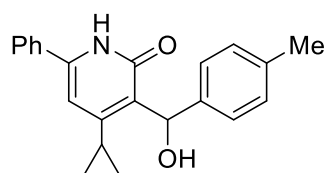

**4-cyclopropyl-3-(hydroxy(p-tolyl)methyl)-6-phenylpyridin-2(1H)-one (3b)**: white solid (32 mg, yield 39%), <sup>1</sup>H NMR (500 MHz, DMSO-*d*<sub>6</sub>) δ 11.85 (s, 1H), 7.72 (dd, *J* = 6.7, 2.9 Hz, 2H), 7.45 (dd, *J* = 5.0, 2.0 Hz, 3H), 7.30 (d, *J* = 7.9 Hz, 2H), 7.10 (d, *J* = 7.9 Hz, 2H), 6.40 (d, *J* = 7.4 Hz, 1H),



6.25 (d,  $J = 6.8$  Hz, 1H), 5.93 (s, 1H), 3.33 (s, 3H), 2.33 – 2.27 (m, 1H), 1.00 – 0.87 (m, 2H), 0.85 – 0.67 (m, 2H).  $^{13}\text{C}$  NMR (126 MHz, DMSO- $d_6$ )  $\delta$  162.50, 153.36, 141.47, 134.60, 128.96, 128.08, 127.85, 126.33, 124.94, 67.43, 20.05, 11.53, 8.75, 8.29. HRMS (ESI)  $m/z$  calculated for  $\text{C}_{22}\text{H}_{22}\text{NO}_2^+$   $[\text{M}+\text{H}]^+$  332.1645, found: 332.1643.

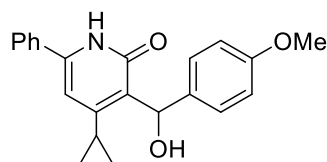

**4-cyclopropyl-3-(hydroxy(4-methoxyphenyl)methyl)-6-phenylpyridin-2(1H)-one (3c):** white solid (66 mg, yield 71%),  $^1\text{H}$  NMR (500 MHz, DMSO- $d_6$ )  $\delta$  11.86 (s, 1H), 7.72 (dd,  $J = 6.7, 3.0$  Hz, 2H), 7.46 (dd,  $J = 5.0, 2.0$  Hz, 3H), 7.37 – 7.25 (m, 2H), 6.93 – 6.77 (m, 2H), 6.44 (d,  $J = 7.5$  Hz, 1H), 6.22 (d,  $J = 7.3$  Hz, 1H), 5.94 (s, 1H), 3.72 (s, 3H), 2.29 (m, 1H), 0.93 (m, 2H), 0.85 – 0.68 (m, 2H).  $^{13}\text{C}$  NMR (126 MHz, DMSO- $d_6$ )  $\delta$  162.51, 157.23, 153.22, 136.44, 132.76, 128.97, 128.08, 126.34, 126.19, 112.70, 100.09, 67.39, 54.38, 11.50, 8.74, 8.25. HRMS (ESI)  $m/z$  calculated for  $\text{C}_{22}\text{H}_{21}\text{NNaO}_3^+$   $[\text{M}+\text{Na}]^+$  370.1414, found: 370.1413.

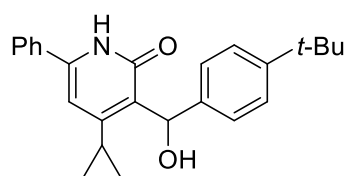

**3-((4-(tert-butyl)phenyl)(hydroxy)methyl)-4-cyclopropyl-6-phenylpyridin-2(1H)-one (3d):** white solid (60 mg, yield 64%),  $^1\text{H}$  NMR (500 MHz, DMSO- $d_6$ )  $\delta$  7.87 – 7.64 (m, 2H), 7.50 – 7.05 (m, 7H), 6.15 (s, 1H), 5.99 (s, 1H), 2.21 (m, 1H), 1.04 – 0.80 (m, 3H), 0.77 (m, 1H).  $^{13}\text{C}$  NMR (126 MHz, DMSO- $d_6$ )  $\delta$  163.58, 154.24, 149.10, 142.43, 130.06, 129.16, 127.43, 125.83, 125.11, 70.25, 68.79, 55.38, 34.57, 31.67, 12.61, 9.86, 9.39. HRMS (ESI)  $m/z$  calculated for  $\text{C}_{25}\text{H}_{28}\text{NO}_2^+$   $[\text{M}+\text{H}]^+$  374.2115, found: 374.2111.

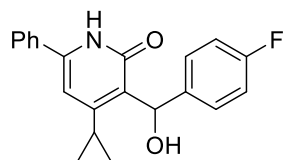

**3-cyclopropyl-3-((4-fluorophenyl)(hydroxy)methyl)-6-phenylpyridin-2(1H)-one (3e):** white solid (31 mg, yield 37%),  $^1\text{H NMR}$  (500 MHz,  $\text{DMSO-}d_6$ )  $\delta$  11.83 (s, 1H), 7.78 – 7.64 (m, 2H), 7.50 – 7.38 (m, 5H), 7.18 – 7.02 (m, 2H), 6.55 – 6.34 (m, 1H), 6.30 (s, 1H), 5.93 (s, 1H), 2.30 (m, 1H), 0.98 – 0.90 (m, 2H), 0.81 – 0.67 (m, 2H).  $^{13}\text{C NMR}$  (126 MHz,  $\text{DMSO-}d_6$ )  $\delta$  162.91, 161.70, 159.78, 154.17, 141.16, 129.51, 128.58, 127.33, 127.26, 126.87, 114.54, 114.38, 100.51, 67.31, 12.01, 9.29, 8.75.  $^{19}\text{F NMR}$  (500 MHz,  $\text{DMSO-}d_6$ )  $\delta$  -117.04. HRMS (ESI)  $m/z$  calculated for  $\text{C}_{21}\text{H}_{19}\text{FNO}_2^+$   $[\text{M}+\text{H}]^+$  336.1394, found: 336.1393.

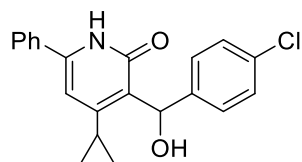

**3-((4-chlorophenyl)(hydroxy)methyl)-4-cyclopropyl-6-phenylpyridin-2(1H)-one (3f):** white solid (61 mg, yield 69%),  $^1\text{H NMR}$  (500 MHz,  $\text{DMSO-}d_6$ )  $\delta$  11.87 (s, 1H), 7.77 – 7.64 (m, 2H), 7.46 (m, 3H), 7.43 – 7.39 (m, 2H), 7.38 – 7.30 (m, 2H), 6.41 (d,  $J = 6.9$  Hz, 1H), 6.32 (d,  $J = 6.9$  Hz, 1H), 5.92 (s, 1H), 2.29 (m, 1H), 0.99 – 0.89 (m, 2H), 0.74 (m, 2H).  $^{13}\text{C NMR}$  (126 MHz,  $\text{DMSO-}d_6$ )  $\delta$  162.35, 153.84, 143.58, 132.74, 130.12, 129.02, 128.08, 127.23, 126.76, 126.36, 99.95, 66.59, 11.54, 8.82, 8.29. HRMS (ESI)  $m/z$  calculated for  $\text{C}_{21}\text{H}_{19}\text{ClNO}_2^+$   $[\text{M}+\text{H}]^+$  352.1099, found: 352.1099.

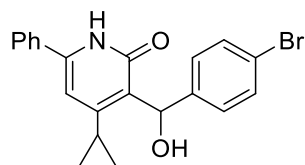

**3-((4-bromophenyl)(hydroxy)methyl)-4-cyclopropyl-6-phenylpyridin-2(1H)-one (3g):** white solid (64 mg, yield 65%),  $^1\text{H NMR}$  (500 MHz,  $\text{DMSO-}d_6$ )  $\delta$  11.86 (s, 1H), 7.77 – 7.64 (m, 2H), 7.53 – 7.43 (m, 5H), 7.38 – 7.31 (m, 2H), 6.40 (d,  $J = 6.9$  Hz, 1H), 6.30 (d,  $J = 6.5$  Hz, 1H), 5.92 (s, 1H), 2.29 (m, 1H), 1.02 – 0.87 (m, 2H), 0.74 (m, 2H).  $^{13}\text{C NMR}$  (126 MHz,  $\text{DMSO-}d_6$ )  $\delta$  162.34, 153.84, 144.03, 130.14, 129.01, 128.08, 127.15, 126.36, 118.63, 66.60, 54.31, 11.53, 8.82, 8.30. HRMS (ESI)  $m/z$

calculated for  $C_{21}H_{19}BrNO_2^+$   $[M+H]^+$  396.0594, found: 396.0593.

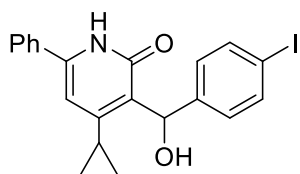

**3-cyclopropyl-3-(hydroxy(4-iodophenyl)methyl)-6-phenylpyridin-2(1H)-one (3h):** white solid (68 mg, yield 61%),  $^1H$  NMR (500 MHz,  $DMSO-d_6$ )  $\delta$  11.85 (s, 1H), 7.71 (dd,  $J = 6.7, 2.9$  Hz, 2H), 7.69 – 7.62 (m, 2H), 7.52 – 7.39 (m, 3H), 7.27 – 7.15 (m, 2H), 6.38 (d,  $J = 7.0$  Hz, 1H), 6.28 (d,  $J = 6.9$  Hz, 1H), 5.91 (s, 1H), 2.29 (m, 1H), 0.93 (m, 2H), 0.75 (m, 2H).  $^{13}C$  NMR (126 MHz,  $DMSO-d_6$ )  $\delta$  163.42, 154.90, 145.55, 137.08, 133.81, 130.10, 129.16, 128.44, 127.44, 92.44, 67.79, 55.38, 12.62, 9.91, 9.41. HRMS (ESI)  $m/z$  calculated for  $C_{21}H_{19}INO_2^+$   $[M+H]^+$  444.0455, found: 444.0456.

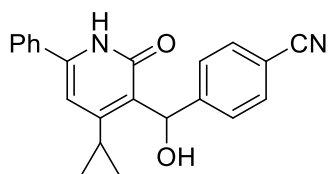

**4-((4-cyclopropyl-2-oxo-6-phenyl-1,2-dihydropyridin-3-yl)(hydroxy)methyl)benzonitrile (3i):** white solid (50 mg, yield 59%),  $^1H$  NMR (500 MHz,  $DMSO-d_6$ )  $\delta$  11.86 (s, 1H), 7.81 – 7.75 (m, 2H), 7.74 – 7.67 (m, 2H), 7.61 – 7.54 (m, 2H), 7.49 – 7.41 (m, 3H), 6.43 (s, 2H), 5.91 (s, 1H), 2.28 (m, 1H), 1.01 – 0.90 (m, 2H), 0.68 (m, 2H).  $^{13}C$  NMR (126 MHz,  $DMSO-d_6$ )  $\delta$  162.24, 154.23, 150.53, 132.72, 131.34, 129.06, 128.08, 127.20, 126.39, 125.72, 118.48, 108.29, 99.86, 66.45, 11.60, 8.88, 8.28. HRMS (ESI)  $m/z$  calculated for  $C_{22}H_{19}N_2O_2^+$   $[M+H]^+$  343.1441, found: 343.1441.

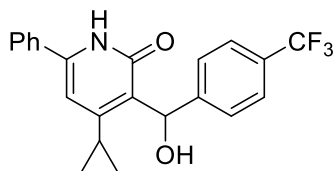

**4-cyclopropyl-3-(hydroxy(4-(trifluoromethyl)phenyl)methyl)-6-phenylpyridin-2(1H)-one (3j):** white solid (35 mg, yield 36%),  $^1H$  NMR (500 MHz,  $DMSO-d_6$ )  $\delta$  11.88 (s, 1H), 7.72 (dd,  $J = 6.6, 2.9$  Hz, 2H), 7.67 (d,  $J = 8.3$  Hz, 2H), 7.61 (d,  $J = 8.2$  Hz, 2H), 7.46 (m, 3H), 6.43 (s, 2H), 5.92 (s, 1H), 2.37

- 2.22 (m, 1H), 0.94 (dd,  $J = 8.6, 6.3$  Hz, 2H), 0.70 (m, 2H).  $^{13}\text{C}$  NMR (126 MHz, DMSO- $d_6$ )  $\delta$  162.29, 154.07, 149.44, 129.04, 128.08, 126.38, 126.14, 125.52, 124.95, 124.23, 124.20, 66.56, 11.58, 8.83, 8.30.  $^{19}\text{F}$  NMR (500 MHz, DMSO- $d_6$ )  $\delta$  -60.62. HRMS (ESI)  $m/z$  calculated for  $\text{C}_{22}\text{H}_{19}\text{F}_3\text{NO}_2^+$   $[\text{M}+\text{H}]^+$  386.1362, found: 386.1362.

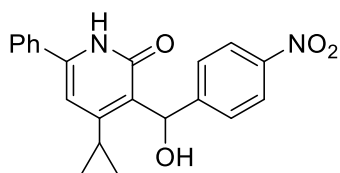

**4-cyclopropyl-3-(hydroxy(4-nitrophenyl)methyl)-6-phenylpyridin-2(1H)-one (3k):** white solid (68 mg, yield 75%),  $^1\text{H}$  NMR (500 MHz, DMSO- $d_6$ )  $\delta$  11.89 (s, 1H), 8.24 – 8.15 (m, 2H), 7.76 – 7.69 (m, 2H), 7.68 – 7.61 (m, 2H), 7.47 – 7.40 (m, 3H), 6.54 – 6.36 (m, 2H), 5.92 (s, 1H), 2.33 – 2.24 (m, 1H), 0.95 (m, 2H), 0.66 (m, 2H).  $^{13}\text{C}$  NMR (126 MHz, DMSO- $d_6$ )  $\delta$  163.27, 155.46, 153.88, 146.46, 133.78, 130.16, 129.17, 127.46, 126.98, 123.69, 100.95, 67.38, 12.73, 9.99, 9.37. HRMS (ESI)  $m/z$  calculated for  $\text{C}_{21}\text{H}_{19}\text{N}_2\text{O}_4^+$   $[\text{M}+\text{H}]^+$  363.1339, found: 363.1334.

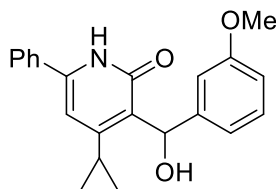

**4-cyclopropyl-3-(hydroxy(3-methoxyphenyl)methyl)-6-phenylpyridin-2(1H)-one (3l):** white solid (63 mg, yield 73%),  $^1\text{H}$  NMR (500 MHz, DMSO- $d_6$ )  $\delta$  7.83 – 7.60 (m, 2H), 7.50 – 7.29 (m, 3H), 7.19 (t,  $J = 7.9$  Hz, 1H), 7.03 (t,  $J = 2.0$  Hz, 1H), 6.97 (d,  $J = 7.6$  Hz, 1H), 6.75 (dd,  $J = 8.2, 2.6$  Hz, 1H), 6.19 (s, 1H), 5.97 (s, 1H), 3.71 (s, 3H), 2.24 (m, 1H), 0.99 – 0.63 (m, 4H). HRMS (ESI)  $m/z$  calculated for  $\text{C}_{22}\text{H}_{22}\text{NO}_3^+$   $[\text{M}+\text{H}]^+$  348.1594, found: 348.1594

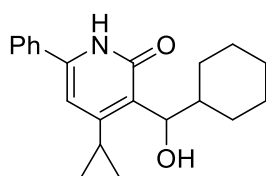

**3-(cyclohexyl(hydroxy)methyl)-4-cyclopropyl-6-phenylpyridin-2(1H)-one (3m):** white solid

(53 mg, yield 62%),  $^1\text{H NMR}$  (500 MHz,  $\text{DMSO-}d_6$ )  $\delta$  11.75 (s, 1H), 7.78 – 7.64 (m, 2H), 7.49 – 7.38 (m, 3H), 5.93 (s, 1H), 5.66 (s, 1H), 4.71 (t,  $J = 8.1$  Hz, 1H), 2.09 (d,  $J = 12.9$  Hz, 1H), 1.91 – 1.53 (m, 4H), 1.37 (d,  $J = 11.2$  Hz, 1H), 1.26 – 0.71 (m, 10H).  $^{13}\text{C NMR}$  (126 MHz,  $\text{DMSO-}d_6$ )  $\delta$  163.18, 153.26, 129.38, 128.55, 126.76, 72.42, 43.10, 29.26, 26.04, 25.81, 25.61, 11.88, 9.36, 8.83. HRMS (ESI)  $m/z$  calculated for  $\text{C}_{21}\text{H}_{26}\text{NO}_2^+$   $[\text{M}+\text{H}]^+$  324.1958, found: 324.1958.

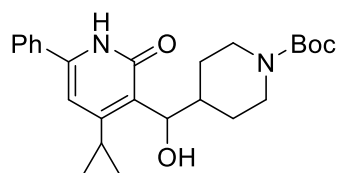

**tert-butyl 4-((4-cyclopropyl-2-oxo-6-phenyl-1,2-dihydropyridin-3-yl)(hydroxy)methyl)piperidine-1-carboxylate (3n):** white solid (29 mg, yield 27%),  $^1\text{H NMR}$  (500 MHz,  $\text{DMSO-}d_6$ )  $\delta$  11.80 (s, 1H), 7.71 (dd,  $J = 6.6, 3.0$  Hz, 2H), 7.45 (dd,  $J = 5.0, 2.0$  Hz, 3H), 5.93 (s, 1H), 5.75 (s, 1H), 4.76 (s, 1H), 4.00 (m, 2H), 1.39 (s, 9H), 1.34 – 1.08 (m, 7H), 1.03 – 0.76 (m, 5H).  $^{13}\text{C NMR}$  (126 MHz,  $\text{DMSO-}d_6$ )  $\delta$  163.18, 153.70, 129.45, 128.57, 126.80, 78.26, 41.35, 28.02, 26.90, 11.84, 9.47, 8.98. HRMS (ESI)  $m/z$  calculated for  $\text{C}_{25}\text{H}_{33}\text{N}_2\text{O}_4^+$   $[\text{M}+\text{H}]^+$  425.2435, found: 425.2434.

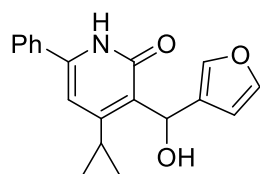

**3-cyclopropyl-3-(furan-3-yl(hydroxy)methyl)-6-phenylpyridin-2(1H)-one (3o):** white solid (36 mg, yield 47%),  $^1\text{H NMR}$  (500 MHz,  $\text{DMSO-}d_6$ )  $\delta$  11.85 (s, 1H), 7.71 (dd,  $J = 6.7, 3.0$  Hz, 2H), 7.55 (t,  $J = 1.7$  Hz, 1H), 7.46 (dd,  $J = 5.1, 1.9$  Hz, 4H), 6.49 – 6.32 (m, 2H), 6.16 (d,  $J = 7.4$  Hz, 1H), 5.94 (s, 1H), 2.36 (m, 1H), 0.94 (m, 3H), 0.87 – 0.76 (m, 1H).  $^{13}\text{C NMR}$  (126 MHz,  $\text{DMSO-}d_6$ )  $\delta$  163.35, 154.21, 143.56, 139.21, 130.07, 129.86, 129.16, 127.42, 110.20, 101.07, 63.07, 46.16, 12.39, 9.80, 9.35. HRMS (ESI)  $m/z$  calculated for  $\text{C}_{19}\text{H}_{18}\text{NO}_3^+$   $[\text{M}+\text{H}]^+$  308.1281, found: 308.1.

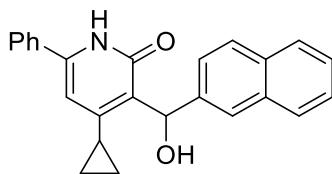

**3-cyclopropyl-3-(hydroxy(naphthalen-2-yl)methyl)-6-phenylpyridin-2(1H)-one (3p):** white solid (76 mg, yield 83%),  $^1\text{H NMR}$  (500 MHz,  $\text{DMSO-}d_6$ )  $\delta$  11.87 (s, 1H), 7.95 – 7.91 (m, 1H), 7.90 – 7.82 (m, 3H), 7.77 – 7.70 (m, 2H), 7.55 (dd,  $J = 8.5, 1.8$  Hz, 1H), 7.50 – 7.43 (m, 5H), 6.51 (d,  $J = 3.4$  Hz, 2H), 5.94 (s, 1H), 2.41 (m, 1H), 1.02 – 0.86 (m, 2H), 0.77 – 0.58 (m, 2H).  $^{13}\text{C NMR}$  (126 MHz,  $\text{DMSO-}d_6$ )  $\delta$  163.01, 154.37, 142.64, 132.69, 131.80, 129.49, 128.58, 127.68, 127.33, 127.30, 126.84, 125.84, 125.29, 124.55, 123.27, 100.51, 67.84, 12.09, 9.28, 8.81. HRMS (ESI)  $m/z$  calculated for  $\text{C}_{25}\text{H}_{22}\text{NO}_2^+$   $[\text{M}+\text{H}]^+$  368.1645, found: 368.1645.

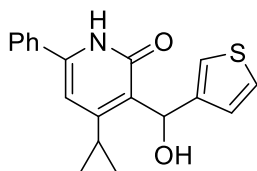

**4-cyclopropyl-3-(hydroxy(thiophen-3-yl)methyl)-6-phenylpyridin-2(1H)-one (3q):** white solid (42 mg, yield 52%),  $^1\text{H NMR}$  (500 MHz,  $\text{DMSO-}d_6$ )  $\delta$  11.85 (s, 1H), 7.71 (dd,  $J = 6.6, 2.9$  Hz, 2H), 7.48 – 7.40 (m, 4H), 7.25 (dd,  $J = 3.0, 1.4$  Hz, 1H), 7.07 (dd,  $J = 5.0, 1.3$  Hz, 1H), 6.59 – 6.44 (m, 1H), 6.27 (d,  $J = 5.5$  Hz, 1H), 5.94 (s, 1H), 2.36 (m, 1H), 0.99 – 0.91 (m, 2H), 0.86 (m, 1H), 0.82 – 0.75 (m, 1H).  $^{13}\text{C NMR}$  (126 MHz,  $\text{DMSO-}d_6$ )  $\delta$  162.80, 153.79, 146.27, 129.50, 128.59, 126.84, 126.42, 125.69, 119.91, 65.90, 11.88, 9.26, 8.76. HRMS (ESI)  $m/z$  calculated for  $\text{C}_{19}\text{H}_{18}\text{NO}_2\text{S}^+$   $[\text{M}+\text{H}]^+$  324.1053, found: 324.1052.

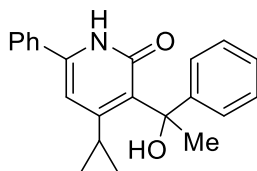

**4-cyclopropyl-3-(1-hydroxy-1-phenylethyl)-6-phenylpyridin-2(1H)-one (3r):** white solid (41 mg, yield 49%),  $^1\text{H NMR}$  (500 MHz,  $\text{DMSO-}d_6$ )  $\delta$  10.32 (s, 1H), 7.74 (d,  $J = 7.6$  Hz, 2H), 7.46 – 7.34 (m, 6H), 7.32 – 7.26 (m, 2H), 7.13 (s, 1H), 6.80 (s, 1H), 2.00 (s, 3H), 1.23 – 1.13 (m, 1H), 0.64 (s, 1H),

0.49 (s, 2H), 0.30 (s, 1H).  $^{13}\text{C}$  NMR (126 MHz, DMSO- $d_6$ )  $\delta$  158.86, 148.99, 144.45, 137.69, 136.28, 128.10, 128.07, 127.78, 113.97, 72.57, 26.90, 25.82, 10.33, 7.95, 6.14. HRMS (ESI)  $m/z$  calculated for  $\text{C}_{22}\text{H}_{22}\text{NO}_2^+$   $[\text{M}+\text{H}]^+$  332.1645, found: 332.1642.

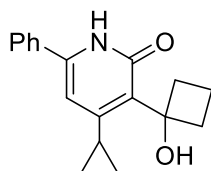

**4-cyclopropyl-3-(1-hydroxycyclobutyl)-6-phenylpyridin-2(1H)-one (3s):** white solid (52 mg, yield 74%),  $^1\text{H}$  NMR (500 MHz, DMSO- $d_6$ )  $\delta$  11.37 (s, 1H), 7.80 – 7.61 (m, 2H), 7.51 – 7.40 (m, 3H), 5.88 (s, 1H), 2.66 (m, 2H), 2.36 (m, 2H), 2.15 – 2.03 (m, 2H), 1.70 – 1.56 (m, 1H), 1.44 – 1.17 (m, 3H), 1.00 – 0.93 (m, 2H).  $^{13}\text{C}$  NMR (126 MHz, DMSO- $d_6$ )  $\delta$  160.94, 152.74, 130.99, 128.67, 128.01, 126.09, 75.61, 66.80, 37.40, 29.19, 27.75, 22.64, 21.79, 15.72, 13.29, 12.30, 10.20, 8.57. HRMS (ESI)  $m/z$  calculated for  $\text{C}_{18}\text{H}_{20}\text{NO}_2^+$   $[\text{M}+\text{H}]^+$  282.1489, found: 282.1489.

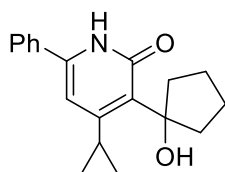

**4-cyclopropyl-3-(1-hydroxycyclopentyl)-6-phenylpyridin-2(1H)-one (3t):** white solid (53 mg, yield 72%),  $^1\text{H}$  NMR (500 MHz, DMSO- $d_6$ )  $\delta$  11.74 (s, 1H), 7.80 – 7.63 (m, 2H), 7.45 (m, 3H), 5.93 (d,  $J = 27.6$  Hz, 1H), 2.67 – 2.54 (m, 1H), 2.48 – 2.42 (m, 1H), 2.32 – 2.17 (m, 2H), 2.06 – 1.91 (m, 3H), 1.81 (m, 1H), 1.68 (m, 1H), 1.05 – 1.00 (m, 1H), 0.95 (m, 2H), 0.89 – 0.82 (m, 1H).  $^{13}\text{C}$  NMR (126 MHz, DMSO- $d_6$ )  $\delta$  164.15, 161.28, 152.69, 138.96, 129.43, 128.58, 128.51, 126.76, 126.65, 101.78, 82.72, 35.10, 32.59, 23.92, 22.99, 14.10, 12.97, 10.04, 9.08. HRMS (ESI)  $m/z$  calculated for  $\text{C}_{19}\text{H}_{22}\text{NO}_2^+$   $[\text{M}+\text{H}]^+$  296.1645, found: 296.1644.

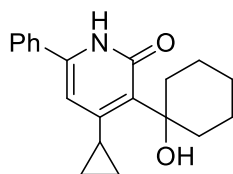

**4-cyclopropyl-3-(1-hydroxycyclohexyl)-6-phenylpyridin-2(1H)-one (3u):** white solid (58 mg, yield 75%),  $^1\text{H NMR}$  (500 MHz,  $\text{DMSO-}d_6$ )  $\delta$  11.93 (s, 1H), 7.70 (dd,  $J = 6.6, 3.0$  Hz, 2H), 7.48 – 7.42 (m, 3H), 6.05 (s, 1H), 2.44 (m, 1H), 2.27 (m, 2H), 1.87 – 1.73 (m, 4H), 1.62 (d,  $J = 13.1$  Hz, 1H), 1.50 – 1.38 (m, 2H), 1.28 – 1.24 (m, 1H), 1.09 – 1.00 (m, 2H), 0.96 – 0.88 (m, 2H).  $^{13}\text{C NMR}$  (126 MHz,  $\text{DMSO-}d_6$ )  $\delta$  164.50, 152.02, 129.49, 128.60, 126.78, 103.41, 74.12, 35.84, 25.02, 21.35, 15.50, 9.86. HRMS (ESI)  $m/z$  calculated for  $\text{C}_{20}\text{H}_{24}\text{NO}_2^+$   $[\text{M}+\text{H}]^+$  310.1802, found: 310.1800.

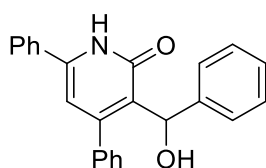

**3-(hydroxy(phenyl)methyl)-4,6-diphenylpyridin-2(1H)-one (3v):** white solid (37 mg, yield 42%),  $^1\text{H NMR}$  (500 MHz,  $\text{DMSO-}d_6$ )  $\delta$  12.25 (s, 1H), 7.81 (dd,  $J = 6.6, 3.0$  Hz, 2H), 7.52 – 7.42 (m, 6H), 7.40 – 7.35 (m, 2H), 7.28 – 7.23 (m, 2H), 7.22 – 7.13 (m, 3H), 6.55 (s, 1H), 6.05 (d,  $J = 9.7$  Hz, 1H), 5.55 (d,  $J = 9.4$  Hz, 1H).  $^{13}\text{C NMR}$  (126 MHz,  $\text{DMSO-}d_6$ )  $\delta$  151.00, 144.22, 138.17, 129.79, 128.70, 128.40, 128.30, 127.91, 127.73, 126.97, 126.40, 125.53, 70.19. HRMS (ESI)  $m/z$  calculated for  $\text{C}_{24}\text{H}_{20}\text{NO}_2^+$   $[\text{M}+\text{H}]^+$  354.1489, found: 354.1488.

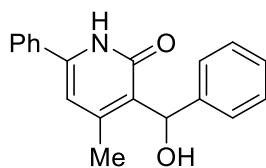

**3-(hydroxy(phenyl)methyl)-4-methyl-6-phenylpyridin-2(1H)-one (3w):** white solid (57 mg, yield 78%),  $^1\text{H NMR}$  (500 MHz,  $\text{DMSO-}d_6$ )  $\delta$  7.83 – 7.64 (m, 2H), 7.47 (d,  $J = 6.5$  Hz, 3H), 7.39 (d,  $J = 7.7$  Hz, 2H), 7.30 (t,  $J = 7.5$  Hz, 2H), 7.19 (t,  $J = 7.3$  Hz, 1H), 6.45 (s, 1H), 6.13 (s, 1H), 3.32 (s, 3H).  $^{13}\text{C NMR}$  (126 MHz,  $\text{DMSO-}d_6$ )  $\delta$  164.04, 149.07, 145.20, 133.79, 130.02, 129.23, 128.38, 127.19, 126.80, 125.95, 109.11, 68.44, 19.62. HRMS (ESI)  $m/z$  calculated for  $\text{C}_{19}\text{H}_{18}\text{NO}_2^+$   $[\text{M}+\text{H}]^+$  292.1332, found: 292.1330.



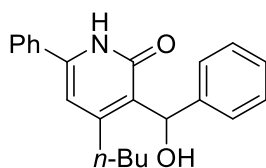

**4-butyl-3-(hydroxy(phenyl)methyl)-6-phenylpyridin-2(1H)-one (3x):** white solid (26 mg, yield 31%),  $^1\text{H NMR}$  (500 MHz,  $\text{DMSO-}d_6$ )  $\delta$  11.89 (s, 1H), 7.81 – 7.68 (m, 2H), 7.51 – 7.44 (m, 3H), 7.40 – 7.34 (m, 2H), 7.32 – 7.26 (m, 2H), 7.22 – 7.14 (m, 1H), 6.45 (s, 1H), 6.24 – 6.04 (m, 2H), 2.56 (m, 1H), 2.48 – 2.43 (m, 1H), 1.44 – 1.32 (m, 1H), 1.27 – 1.21 (m, 1H), 1.16 – 1.06 (m, 1H), 0.77 (t,  $J = 7.3$  Hz, 3H).  $^{13}\text{C NMR}$  (126 MHz,  $\text{DMSO-}d_6$ )  $\delta$  163.59, 153.17, 145.21, 133.09, 129.45, 128.64, 127.73, 126.63, 126.09, 125.28, 107.23, 67.38, 31.60, 31.28, 22.18, 13.60. HRMS (ESI)  $m/z$  calculated for  $\text{C}_{22}\text{H}_{24}\text{NO}_2^+$   $[\text{M}+\text{H}]^+$  334.1802, found: 334.1801.

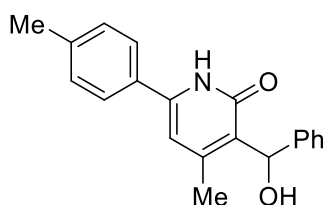

**3-(hydroxy(phenyl)methyl)-4-methyl-6-(p-tolyl)pyridin-2(1H)-one (3y):** white solid (22 mg, yield 29%),  $^1\text{H NMR}$  (500 MHz,  $\text{DMSO-}d_6$ )  $\delta$  10.88 (s, 1H), 7.70 – 7.60 (m, 2H), 7.46 (s, 1H), 7.44 – 7.39 (m, 2H), 7.36 (dd,  $J = 8.4, 6.8$  Hz, 2H), 7.31 – 7.25 (m, 1H), 7.17 (d,  $J = 8.0$  Hz, 2H), 6.48 – 6.19 (m, 1H), 5.77 (d,  $J = 3.2$  Hz, 1H), 2.31 (s, 3H), 1.99 (s, 3H).  $^{13}\text{C NMR}$  (126 MHz,  $\text{DMSO-}d_6$ )  $\delta$  160.75, 142.87, 141.85, 136.81, 134.02, 128.91, 128.83, 128.38, 127.97, 126.85, 69.90, 21.26, 15.70. HRMS (ESI)  $m/z$  calculated for  $\text{C}_{20}\text{H}_{20}\text{NO}_2^+$   $[\text{M}+\text{H}]^+$  306.1489, found: 306.1486.

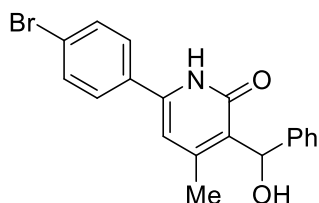

**6-(4-bromophenyl)-3-(hydroxy(phenyl)methyl)-4-methylpyridin-2(1H)-one (3z):** white solid (42 mg, yield 45%),  $^1\text{H NMR}$  (500 MHz,  $\text{DMSO-}d_6$ )  $\delta$  11.82 (s, 1H), 7.70 (d,  $J = 8.7$  Hz, 2H), 7.44 – 7.35 (m, 2H), 7.29 (t,  $J = 7.7$  Hz, 2H), 7.22 – 7.15 (m, 1H), 7.08 – 6.92 (m, 2H), 6.39 (s, 1H), 6.34 – 6.21 (m, 1H), 6.16 – 6.06 (m, 1H), 2.14 (s, 3H).  $^{13}\text{C NMR}$  (126 MHz,  $\text{DMSO-}d_6$ )  $\delta$  163.93, 160.89, 149.27, 145.25,

144.05, 128.61, 128.37, 126.78, 125.95, 125.79, 114.66, 108.08, 68.48, 55.81, 19.64. HRMS (ESI)  $m/z$  calculated for  $C_{19}H_{17}BrNO_2^+$   $[M+H]^+$  370.0437, found: 370.0437.

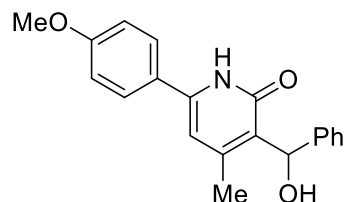

**3-(hydroxy(phenyl)methyl)-6-(4-methoxyphenyl)-4-methylpyridin-2(1H)-one (3za):** white solid (30 mg, yield 38%),  $^1H$  NMR (500 MHz,  $DMSO-d_6$ )  $\delta$  11.05 (s, 1H), 7.82 – 7.69 (m, 2H), 7.59 – 7.50 (m, 3H), 7.42 (d,  $J = 8.3$  Hz, 2H), 7.39 – 7.32 (m, 2H), 7.30 – 7.22 (m, 1H), 6.41 (s, 1H), 5.76 (dd,  $J = 12.3, 1.4$  Hz, 1H), 3.34 (s, 3H), 1.99 (s, 3H).  $^{13}C$  NMR (126 MHz,  $DMSO-d_6$ )  $\delta$  160.54, 146.47, 143.55, 141.69, 136.09, 131.24, 130.54, 128.84, 128.02, 126.88, 126.34, 120.75, 69.97, 15.69. HRMS (ESI)  $m/z$  calculated for  $C_{20}H_{19}KNO_3^+$   $[M+K]^+$  360.0997, found: 360.0994.

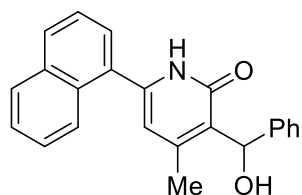

**3-(hydroxy(phenyl)methyl)-4-methyl-6-(naphthalen-1-yl)pyridin-2(1H)-one (3zb):** white solid (42 mg, yield 61%),  $^1H$  NMR (500 MHz,  $DMSO-d_6$ )  $\delta$  11.02 (s, 1H), 8.05 – 7.80 (m, 2H), 7.62 (dd,  $J = 8.4, 2.9$  Hz, 1H), 7.55 – 7.47 (m, 4H), 7.45 (m, 1H), 7.42 – 7.36 (m, 3H), 7.35 (s, 1H), 7.33 – 7.27 (m, 1H), 6.43 (s, 1H), 5.84 (d,  $J = 3.5$  Hz, 1H), 2.02 (s, 3H).  $^{13}C$  NMR (126 MHz,  $DMSO-d_6$ )  $\delta$  160.96, 145.62, 141.89, 135.93, 133.54, 131.84, 128.89, 128.52, 128.21, 128.03, 127.81, 126.97, 126.52, 126.23, 126.17, 125.91, 70.11, 15.71. HRMS (ESI)  $m/z$  calculated for  $C_{23}H_{20}NO_2^+$   $[M+H]^+$  342.1489, found: 342.1489.

## Scale-up Experiments

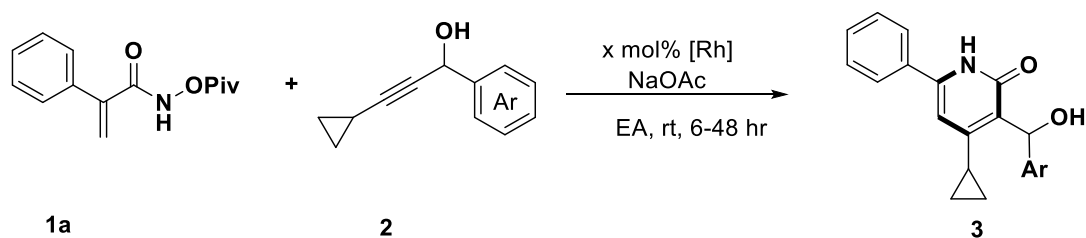

In a 50 mL reaction tube, the mixture of **1a** (494.6 mg, 2.0 mmol, 1.0 eq.), **2** (3.0 mmol, 1.5 eq.), [Cp\**RhCl*<sub>2</sub>]<sub>2</sub> (2.5 or 1.0 mol%) and NaOAc (2.0 mmol, 1.0 eq.) was added EA (10.0 mL). Then the resulting mixture was stirred at room temperature for 6.0~48 hours. When the reaction was finished, the product precipitated out was simply collected by filtration. The product **3a** or **3p** was obtained as a white solid. The rest reaction mixture was subjected to flash chromatography on silica gel (dichloromethane/methanol) to provide the rest products **3a** or **3p**, the total yields were reported.

## Control Experiments

a) Procedure for the Synthesis of **4a** and **4a'**

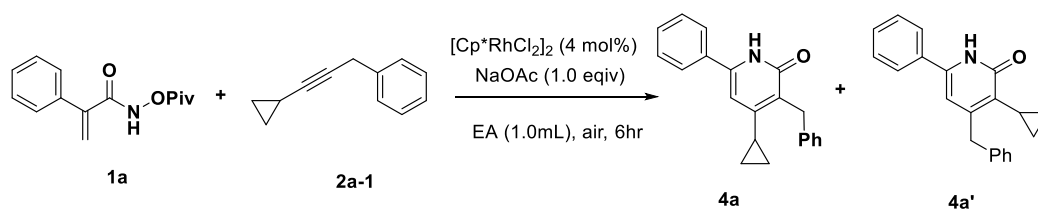

In a 10 mL reaction tube, the mixture of **1a** (0.2 mmol), **2a-1** (0.3 mmol), [Cp\**RhCl*<sub>2</sub>]<sub>2</sub> (4.0 mol%) and NaOAc (1.0 eq.) was added EA (1.0 mL). Then the resulting mixture was stirred for 12 h. When the reaction was finished, the solvent was removed under vacuum. The reaction mixture was subjected directly to flash chromatography on silica gel (dichloromethane/methanol) to provide the products **4a** in 32% yield and **4a'** in 42% yield.

Characterization Data of **4a**, **4a'**

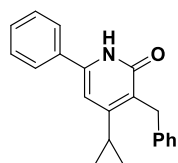

**3-benzyl-4-cyclopropyl-6-phenylpyridin-2(1H)-one (4a)**: white solid (39 mg, yield 32%); <sup>1</sup>H

**NMR** (500 MHz, DMSO-*d*<sub>6</sub>) δ 11.61 (s, 1H), 7.71 (dd, *J* = 7.3, 2.2 Hz, 2H), 7.46 – 7.38 (m, 3H), 7.29 – 7.19 (m, 4H), 7.17 – 7.05 (m, 1H), 5.94 (s, 1H), 4.02 (s, 2H), 2.04 – 1.90 (m, 1H), 0.92 (m, 2H), 0.86 – 0.77 (m, 2H). **<sup>13</sup>C NMR** (126 MHz, DMSO-*d*<sub>6</sub>) δ 163.39, 153.45, 141.28, 134.32, 129.79, 129.12, 128.64, 127.22, 126.08, 100.76, 31.15, 13.19, 9.07. LCMS (ESI) *m/z* calculated for C<sub>21</sub>H<sub>20</sub>NO<sup>+</sup> [M+H]<sup>+</sup> 302.2, found: 302.2.

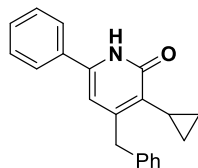

**4-benzyl-3-cyclopropyl-6-phenylpyridin-2(1H)-one (4a')**: white solid (51 mg, yield 42%); **<sup>1</sup>H NMR** (500 MHz, DMSO-*d*<sub>6</sub>) δ 11.42 (s, 1H), 7.72 – 7.58 (m, 2H), 7.40 (q, *J* = 7.3, 6.8 Hz, 3H), 7.27 (m, 3H), 7.18 (t, *J* = 7.1 Hz, 1H), 6.41 (s, 1H), 4.05 (s, 2H), 1.70 – 1.51 (m, 1H), 1.02 (m, 2H), 0.75 (m, 2H). **<sup>13</sup>C NMR** (126 MHz, DMSO-*d*<sub>6</sub>) δ 163.46, 151.84, 143.67, 139.93, 134.14, 129.69, 129.19, 129.11, 128.97, 126.86, 126.63, 107.77, 38.51, 10.33, 6.62. LCMS (ESI) *m/z* calculated for C<sub>21</sub>H<sub>20</sub>NO<sup>+</sup> [M+H]<sup>+</sup> 302.2, found: 302.2.

b) Procedure for the Synthesis of **5a** and **5a'**

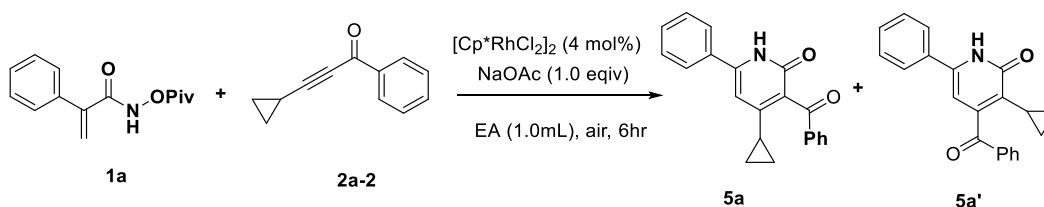

In a 10 mL reaction tube, the mixture of **1a** (0.2 mmol), **2a-2** (0.3 mmol), [Cp\*RhCl<sub>2</sub>]<sub>2</sub> (4.0 mol%) and NaOAc (1.0 eq.) was added EA (1.0 mL). Then the resulting mixture was stirred for 12 h. When the reaction was finished, the solvent was removed under vacuum. The reaction mixture was subjected directly to flash chromatography on silica gel (dichloromethane/ methanol) to provide the products **5a** in 8% yield and **5a'** in 24% yield.

Characterization Data of **5a**, **5a'**

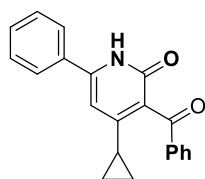

**3-benzoyl-4-cyclopropyl-6-phenylpyridin-2(1H)-one (5a):** yellow liquid (10 mg, yield 8%);  $^1\text{H}$  NMR (500 MHz,  $\text{DMSO-}d_6$ )  $\delta$  11.92 (s, 1H), 7.87 – 7.82 (m, 2H), 7.78 (dd,  $J = 6.6, 3.0$  Hz, 2H), 7.68 – 7.62 (m, 1H), 7.54 (t,  $J = 7.7$  Hz, 2H), 7.50 – 7.45 (m, 3H), 6.07 (s, 1H), 1.51 (m, 1H), 0.99 – 0.93 (m, 2H), 0.90 (m, 2H).  $^{13}\text{C}$  NMR (126 MHz,  $\text{DMSO-}d_6$ )  $\delta$  196.68, 174.75, 161.16, 155.65, 137.48, 134.16, 130.43, 130.11, 129.40, 129.37, 129.20, 127.65, 13.50, 9.97. LCMS (ESI)  $m/z$  calculated for  $\text{C}_{21}\text{H}_{18}\text{NO}_2^+$   $[\text{M}+\text{H}]^+$  316.1, found: 316.2.

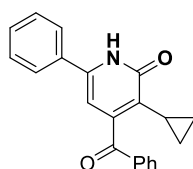

**4-benzoyl-3-cyclopropyl-6-phenylpyridin-2(1H)-one (5a')**: yellow liquid (29 mg, yield 24%);  $^1\text{H}$  NMR (500 MHz,  $\text{DMSO-}d_6$ )  $\delta$  11.90 (s, 1H), 7.93 – 7.86 (m, 2H), 7.80 – 7.75 (m, 2H), 7.74 – 7.69 (m, 1H), 7.59 (t,  $J = 7.7$  Hz, 2H), 7.45 (dd,  $J = 5.2, 1.9$  Hz, 3H), 6.50 (s, 1H), 1.39 (m, 1H), 0.93 – 0.83 (m, 2H), 0.61 – 0.49 (m, 2H).  $^{13}\text{C}$  NMR (126 MHz,  $\text{DMSO-}d_6$ )  $\delta$  196.87, 163.26, 149.14, 145.16, 135.98, 134.79, 133.68, 130.11, 129.92, 129.64, 129.23, 127.17, 102.93, 12.09, 6.33. LCMS (ESI)  $m/z$  calculated for  $\text{C}_{21}\text{H}_{18}\text{NO}_2^+$   $[\text{M}+\text{H}]^+$  316.1, found: 316.2.

### NOESY Experiments for Product 4a, 4a', 5a, 5a'

#### 1) NOESY spectra of product 4a

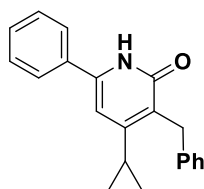

4a

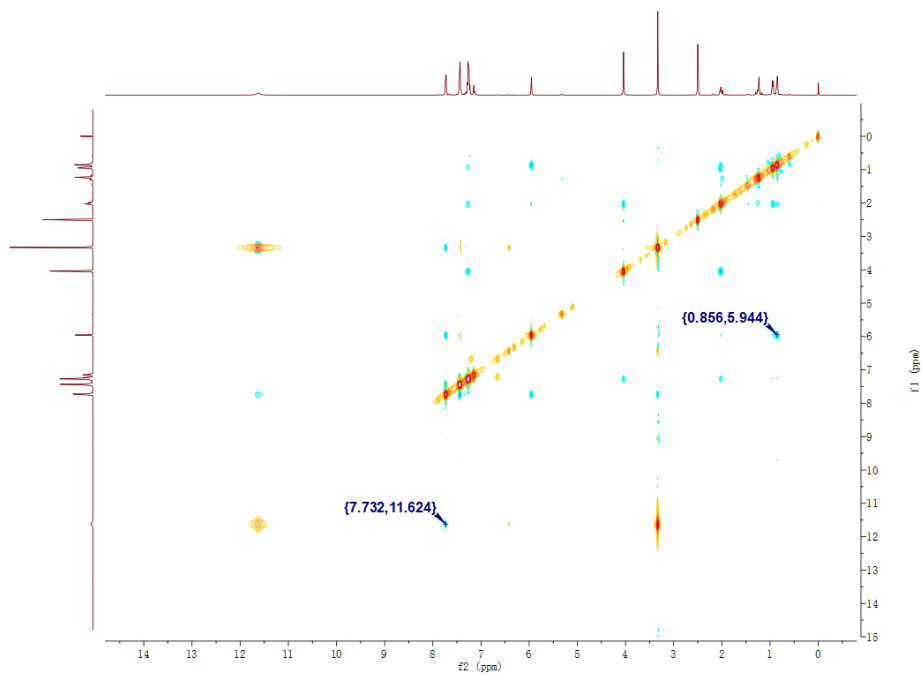

2) NOESY spectra of product 4a'

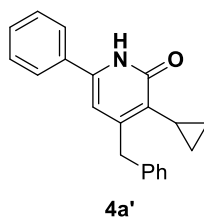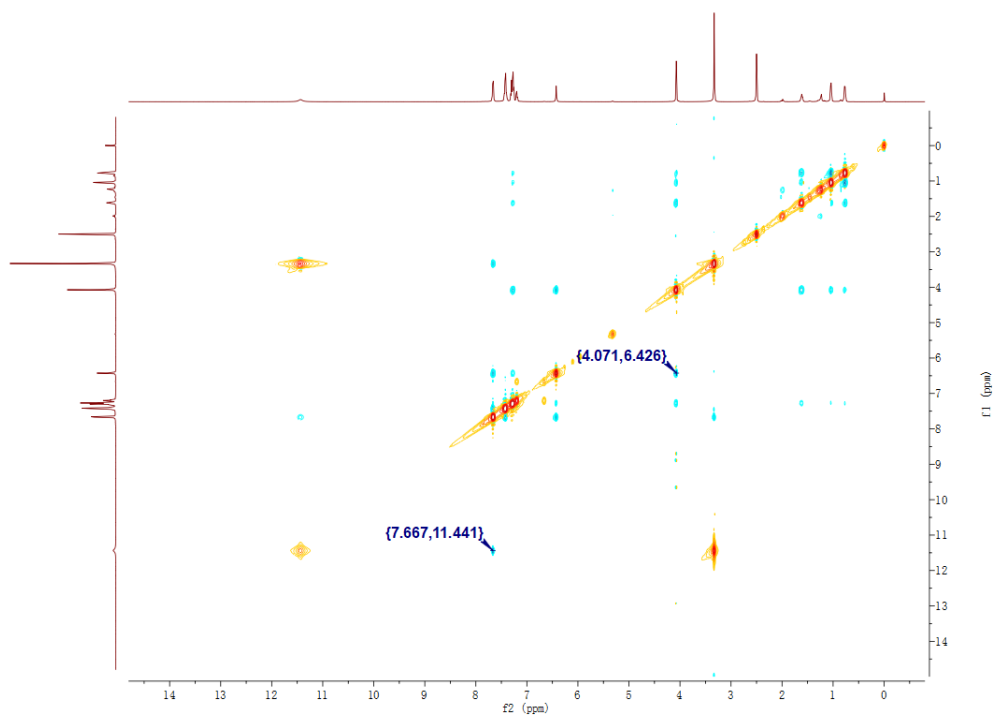

3) NOESY spectra of product **5a**

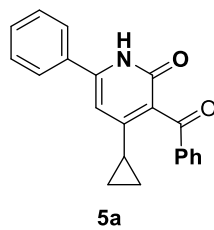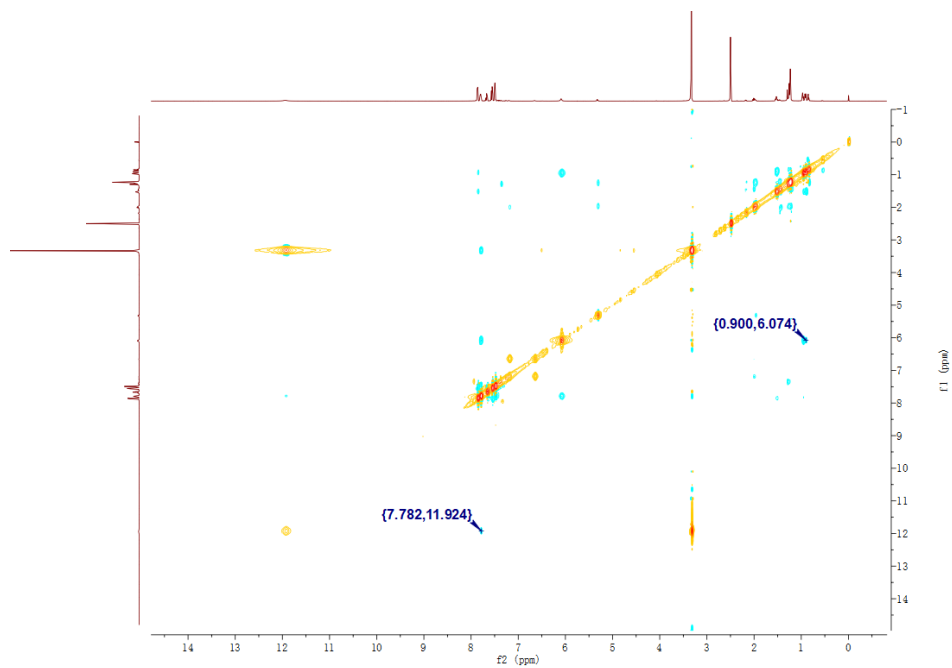

4) NOESY spectra of product **5a'**

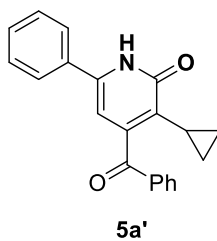

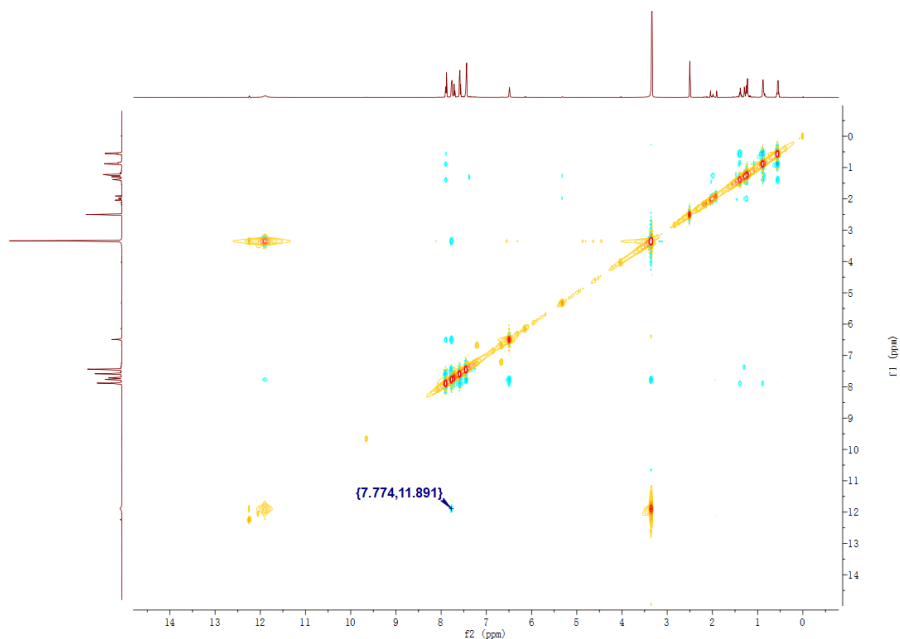

## Mechanistic Experiments

### Deuterium Incorporation Experiment A

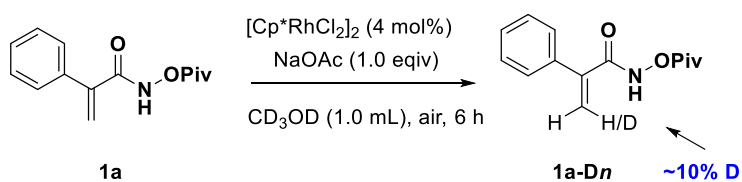

To a mixture of **1a** (49.5 mg, 0.2 mmol, 1.0 eq.),  $[\text{Cp}^*\text{RhCl}_2]_2$  (4.9 mg, 0.008 mmol, 4 mol%) and NaOAc (16.4 mg, 0.2 mmol, 1.0 eq.) in a 10 mL reaction tube was added  $\text{CD}_3\text{OD}$  (1.0 mL). Then the resulting mixture was stirred at the temperature for 6.0 h. After removal of the solvents under vacuum, the residue obtained was directly used for  $^1\text{H}$  NMR analysis. The reaction of **1a** (49.5 mg, 0.2 mmol, 1.0 eq.) without **2a** provided the product **1a-D<sub>n</sub>**. Found ~10% H/D exchange occurred at the olefinic bond of **1a**.



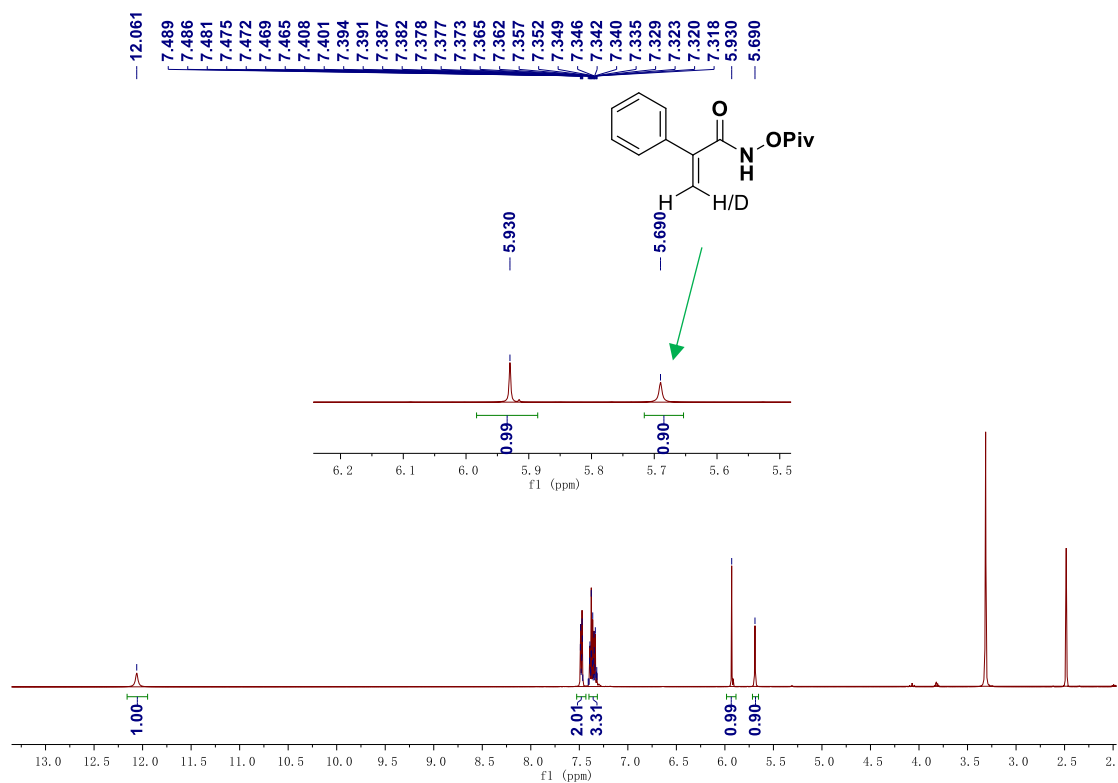

### Deuterium Incorporation Experiment B

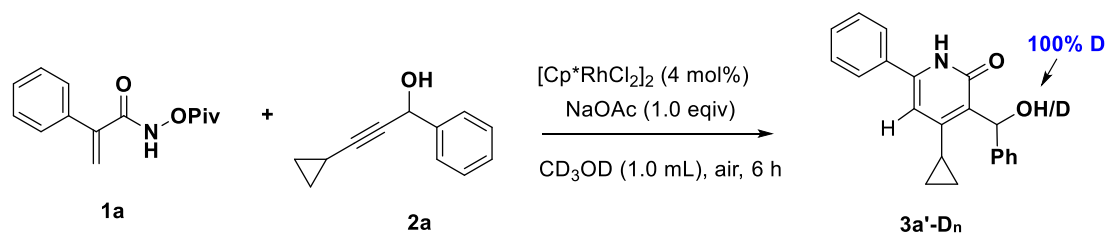

To a mixture of **1a** (49.5 mg, 0.2 mmol, 1.0 eq.), **2a** (51.7 mg, 0.3 mmol, 1.5 eq.),  $[\text{Cp}^*\text{RhCl}_2]_2$  (4.9 mg, 0.008 mmol, 4 mol%) and NaOAc (16.4 mg, 0.2 mmol, 1.0 eq.) in a 10 mL reaction tube was added  $\text{CD}_3\text{OD}$  (1.0 mL). Then the resulting mixture was stirred at the temperature for 6.0 h. After removal of the solvents under vacuum, the residue obtained was directly used for  $^1\text{H}$  NMR analysis.

The reaction of **1a** (49.5 mg, 0.2 mmol, 1.0 eq.) with **2a** (51.7 mg, 0.3 mmol, 1.5 eq.) provided the product **3a-D<sub>n</sub>**, found almost 100% deuterium incorporation at the hydrogen of hydroxyl group.

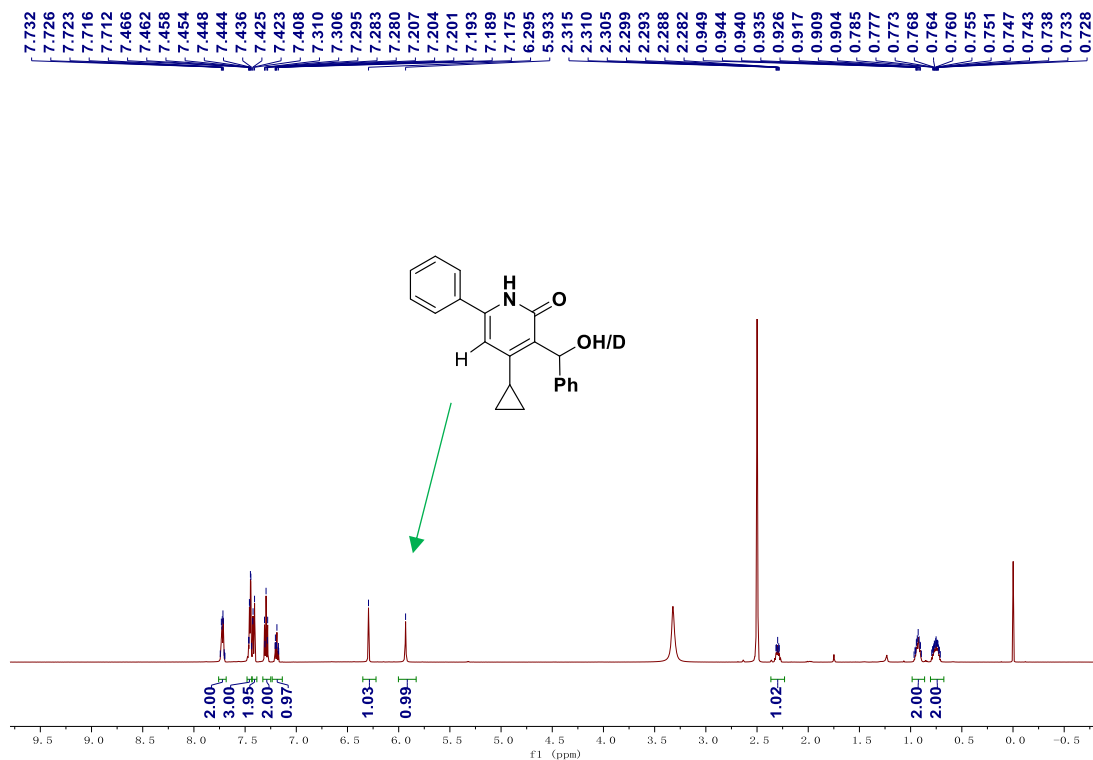

### Determination of the KIE

#### Two parallel reactions for KIE value measurement

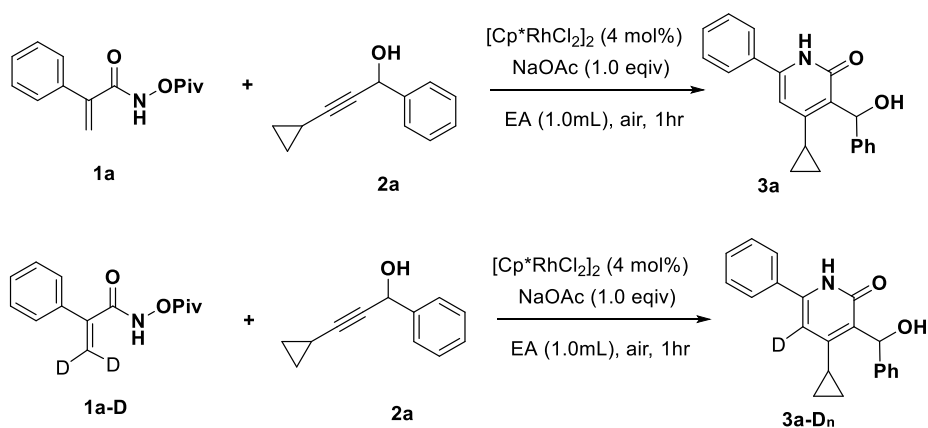

To a mixture of **1a** (49.5 mg, 0.2 mmol, 1.0 eq.), **2a** (51.7 mg, 0.3 mmol, 1.5 eq.),  $[\text{Cp}^*\text{RhCl}_2]_2$  (4.9 mg, 0.008 mmol, 4 mol%) and NaOAc (16.4 mg, 0.2 mmol, 1.0 eq.) in a 10 mL reaction tube was added EA (1.0 mL). Then the resulting mixture was stirred at the temperature for 1.0 h. The reaction was finished to provide the product **3a** (19.0 mg, 30% yield).

To a mixture of **1a-D** (49.8 mg, 0.2 mmol, 1.0 eq.), **2a** (51.7 mg, 0.3 mmol, 1.5 eq.),  $[\text{Cp}^*\text{RhCl}_2]_2$  (4.9 mg, 0.008 mmol, 4 mol%) and NaOAc (16.4 mg, 0.2 mmol, 1.0 eq.) in a 10 mL reaction tube was added EA (1.0 mL). Then the resulting mixture was stirred at the temperature for 1.0 h. The

reaction was finished to provide the product **3a-D<sub>n</sub>** (17.0 mg, 27% yield). The ratio of **3aa/3aa-D<sub>n</sub>** was 1.12 (0.30/0.27)

### Catalyst Recycling Experiments

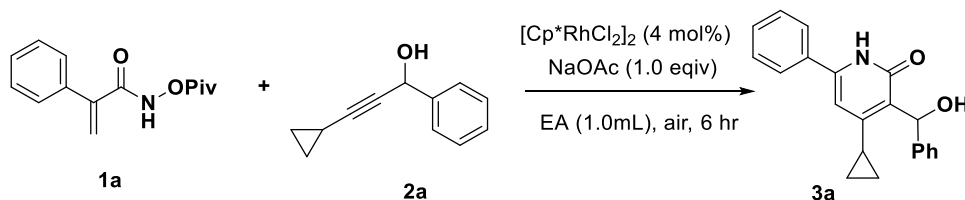

In a 10 mL reaction tube, the mixture of **1a** (0.3 mmol), **2a** (0.45 mmol),  $[\text{Cp}^*\text{RhCl}_2]_2$  (4.0 mol%) and NaOAc (1.0 eq.) was added EA (1.0 mL). Then the resulting mixture was stirred for 6.0 ~ 24 h. When the reaction was finished, the desired product precipitated out as a solid, and the product **3a** was simply collected by filtration. The precipitation was washed with H<sub>2</sub>O and EA. The filtrate (concentrated to ~1 mL) was reused in the next cycle without adding additional rhodium catalyst. **1aa** (0.3 mmol), **2aa** (0.45 mmol), and NaOAc (1.0 eq.) were added to the filtrate in each cycle. Repeating the above-mentioned procedure for 4 times, the results were shown as below.

| Number of runs | Isolated yield (%) |
|----------------|--------------------|
| 1              | 63                 |
| 2              | 53                 |
| 3              | 42                 |
| 4              | 45                 |

**X-ray data of compound 3c (Deposition Data: CCDC 2213771)**

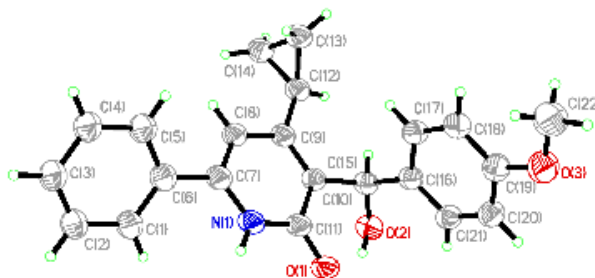

**Table S1.** Crystal data and structure refinement for compound **3c**.

|                                             |                                                               |
|---------------------------------------------|---------------------------------------------------------------|
| Identification code                         | fast                                                          |
| Empirical formula                           | C <sub>22</sub> H <sub>11</sub> NO <sub>3</sub>               |
| Formula weight                              | 347.4                                                         |
| Temperature/K                               | 293.15                                                        |
| Crystal system                              | monoclinic                                                    |
| Space group                                 | P 2 <sub>1</sub> /c                                           |
| a/Å                                         | 13.3096(4)                                                    |
| b/Å                                         | 10.8544(4)                                                    |
| c/Å                                         | 12.5557(4)                                                    |
| α/°                                         | 90                                                            |
| β/°                                         | 91.697(2)                                                     |
| γ/°                                         | 90                                                            |
| Volume/Å <sup>3</sup>                       | 1813.10(10)                                                   |
| Z                                           | 4                                                             |
| ρ <sub>calc</sub> /cm <sup>3</sup>          | 1.273                                                         |
| μ/mm <sup>-1</sup>                          | 0.679                                                         |
| F(000)                                      | 736                                                           |
| Crystal size/mm <sup>3</sup>                | 0.22 × 0.18 × 0.16                                            |
| Radiation                                   | Cu Kα (λ = 1.54178)                                           |
| 2θ range for data collection/°              | 6.64 to 153.08                                                |
| Index ranges                                | -16 ≤ h ≤ 16, -13 ≤ k ≤ 13, -15 ≤ l ≤ 14                      |
| Reflections collected                       | 16770                                                         |
| Independent reflections                     | 3689 [R <sub>int</sub> = 0.0896, R <sub>sigma</sub> = 0.1247] |
| Data/restraints/parameters                  | 3689/411/281                                                  |
| Goodness-of-fit on F <sup>2</sup>           | 1.144                                                         |
| Final R indexes [I ≥ 2σ (I)]                | R <sub>1</sub> = 0.1063, wR <sub>2</sub> = 0.2709             |
| Final R indexes [all data]                  | R <sub>1</sub> = 0.1208, wR <sub>2</sub> = 0.2778             |
| Largest diff. peak/hole / e Å <sup>-3</sup> | 0.55/-0.32                                                    |

**X-ray data of compound 3w (Deposition Data: CCDC 2234440)**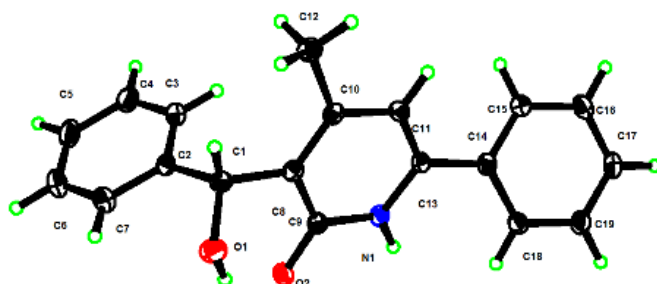**Table S2.** Crystal data and structure refinement for compound **3w**.

|                                             |                                                               |
|---------------------------------------------|---------------------------------------------------------------|
| Identification code                         | A                                                             |
| Empirical formula                           | C <sub>19</sub> H <sub>17</sub> NO <sub>2</sub>               |
| Formula weight                              | 291.33                                                        |
| Temperature/K                               | 150                                                           |
| Crystal system                              | monoclinic                                                    |
| Space group                                 | P 21/c                                                        |
| a/Å                                         | 14.0628(8)                                                    |
| b/Å                                         | 9.8424(7)                                                     |
| c/Å                                         | 11.6643(7)                                                    |
| α/°                                         | 90                                                            |
| β/°                                         | 114.207(2)                                                    |
| γ/°                                         | 90                                                            |
| Volume/Å <sup>3</sup>                       | 1472.52(16)                                                   |
| Z                                           | 4                                                             |
| ρ <sub>calc</sub> /cm <sup>3</sup>          | 1.314                                                         |
| μ/mm <sup>-1</sup>                          | 0.085                                                         |
| F(000)                                      | 616.0                                                         |
| Crystal size/mm <sup>3</sup>                | 0.12 × 0.08 × 0.05                                            |
| Radiation                                   | Mo Kα (λ = 0.71073)                                           |
| 2θ range for data collection/°              | 5.216 to 52.784                                               |
| Index ranges                                | -17 ≤ h ≤ 17, -12 ≤ k ≤ 12, -14 ≤ l ≤ 12                      |
| Reflections collected                       | 10699                                                         |
| Independent reflections                     | 2991 [R <sub>int</sub> = 0.0829, R <sub>sigma</sub> = 0.0766] |
| Data/restraints/parameters                  | 2991/0/201                                                    |
| Goodness-of-fit on F <sup>2</sup>           | 1.075                                                         |
| Final R indexes [I ≥ 2σ (I)]                | R <sub>1</sub> = 0.0619, wR <sub>2</sub> = 0.1580             |
| Final R indexes [all data]                  | R <sub>1</sub> = 0.0921, wR <sub>2</sub> = 0.1846             |
| Largest diff. peak/hole / e Å <sup>-3</sup> | 0.27/-0.31                                                    |

## Computational Mechanistic Studies

### Computational details:

Density functional theory (DFT)<sup>6</sup> calculations were performed by using Gaussian 09 quantum chemical package.<sup>7</sup> Unless otherwise specified, geometry optimizations were performed using B3LYP<sup>8</sup> functional with Grimme D3 correction (EmpiricalDispersion=GD3BJ).<sup>9</sup> Herein, the Stuttgart/Dresden effective core potential (SDD)<sup>10</sup> was used for Rh in conjunction with a standard 6-31G(d,p) basis set<sup>11</sup> for all other atoms. This level of theory is denoted as B3LYP-D3(BJ)/6-31G(d,p) SDD or B3D3/BS1. Frequency analysis was conducted at the same level of theory to verify the stationary points to be real minima or saddle points and to obtain the thermodynamic energy corrections. Intrinsic reaction coordinate (IRC) calculations<sup>12</sup> were carried out to confirm that all transition state structures connect the corresponding reactants and products. Solvent effects in ethyl acetate (EA) were estimated by using the SMD<sup>13</sup> solvation method (solvent=EthylEthanoate) at the M06<sup>14</sup> level of theory with Grimme D3 correction (EmpiricalDispersion=GD3). Herein, SDD was used for Rh and 6-31G(d,p) basis set was used for hydrogen atoms. The 6-311++G(d,p) basis set was used for all other atoms. This level of theory is denoted as M06-D3 SMD/6-311++G(d,p) SDD or M06D3 SMD/BS2. If not noted, the energies presented in this paper are the (M06D3 SMD/BS2)-calculated single point energies with (B3D3/BS1)-calculated thermodynamic corrections which were calculated under standard conditions (1 atm and 298.15 K) (denoted as  $\Delta G_{\text{sol}}(\text{M06-D3 SMD/6-311++G(d,p) SDD//B3LYP-D3(BJ)/6-31G(d,p) SDD})$  or  $\Delta G$  for clarity). The 3D diagrams of optimized structures are illustrated using CYLView.<sup>15</sup> Multiwfn<sup>16</sup> was utilized to analyze interactions with the independent gradient model based on Hirshfeld partition of molecular density (IGMH)<sup>17</sup> and the graphics are displayed using VMD program.<sup>18</sup> The Mulliken atomic charge was analyzed by Multiwfn.

**Table S3.** Comparison of intermediates INT-3 and INT-4i with their analogues.

|                        |       | 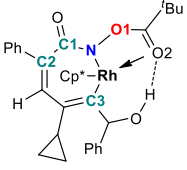<br>INT-3 | <br>INT-4i | <br>INT-3 <sub>Ph</sub> | <br>INT-4i <sub>Ph</sub> |
|------------------------|-------|--------------------------------------------------------------------------------------------|---------------------------------------------------------------------------------------------|-----------------------------------------------------------------------------------------------------------|-------------------------------------------------------------------------------------------------------------|
| Bond                   | C1-C2 | 1.51                                                                                       | 1.51                                                                                        | 1.51                                                                                                      | 1.51                                                                                                        |
|                        | N-O1  | 1.48                                                                                       | -                                                                                           | 1.48                                                                                                      | -                                                                                                           |
|                        | N-C2  | 2.38                                                                                       | 2.27                                                                                        | 2.38                                                                                                      | 2.27                                                                                                        |
|                        | N-C3  | 2.85                                                                                       | 2.84                                                                                        | 2.88                                                                                                      | 2.86                                                                                                        |
| Mulliken atomic charge | Rh    | 0.0920                                                                                     | 0.2572                                                                                      | 0.0879                                                                                                    | 0.2531                                                                                                      |
|                        | N     | -0.2947                                                                                    | -0.3958                                                                                     | -0.2965                                                                                                   | -0.3828                                                                                                     |
|                        | O1    | -0.3229                                                                                    | -0.4573                                                                                     | -0.3246                                                                                                   | -0.4558                                                                                                     |
|                        | C2    | 0.0346                                                                                     | -0.0153                                                                                     | 0.0216                                                                                                    | -0.0038                                                                                                     |
|                        | C3    | -0.0506                                                                                    | -0.0089                                                                                     | -0.0395                                                                                                   | -0.0075                                                                                                     |

**Various energy values for the reported species and imaginary frequencies for the transition states**

**Table S4.** Energy, enthalpy and free energy corrections of the structures calculated at B3LYP-D3(BJ)/6-31G(d,p) SDD, single point energies at the M06-D3 SMD/6-311++G(d,p) SDD//B3LYP-D3(BJ)/6-31G(d,p) SDD level (in Hartree) and imaginary frequencies of the transition states.

| Structures              | corr. to ZPE | corr. to <i>E</i> | corr. to <i>H</i> | corr. to <i>G</i> | SP <sub>SMD</sub> | Imaginary frequency |
|-------------------------|--------------|-------------------|-------------------|-------------------|-------------------|---------------------|
| <b>2a</b>               | 0.205697     | 0.218059          | 0.219004          | 0.163764          | -539.379153       | —                   |
| <b>PC1</b>              | 0.352129     | 0.372144          | 0.373088          | 0.301751          | -1016.419180      | —                   |
| <b>PC2</b>              | 0.351575     | 0.371776          | 0.372721          | 0.301292          | -1016.413484      | —                   |
| <b>HOAc</b>             | 0.062006     | 0.066586          | 0.067531          | 0.034715          | -229.0377862      | —                   |
| <b>Cp*Rh(OAc)(OPiv)</b> | 0.411727     | 0.439702          | 0.440646          | 0.353085          | -1075.257734      | —                   |
| <b>INT-0</b>            | 0.488166     | 0.520121          | 0.521066          | 0.424395          | -1323.079708      | —                   |
| <b>INT-1</b>            | 0.698184     | 0.742556          | 0.743500          | 0.619754          | -1862.502940      | —                   |
| <b>TS-1</b>             | 0.697186     | 0.740865          | 0.741809          | 0.620156          | -1862.485075      | -358.95             |
| <b>INT-2</b>            | 0.700549     | 0.743721          | 0.744665          | 0.627050          | -1862.531136      | —                   |
| <b>TS-2</b>             | 0.700024     | 0.742785          | 0.743729          | 0.626430          | -1862.520257      | -158.68             |
| <b>INT-3</b>            | 0.701510     | 0.744409          | 0.745353          | 0.627583          | -1862.535260      | —                   |
| <b>TS-3</b>             | 0.696825     | 0.740395          | 0.741339          | 0.621582          | -1862.518086      | -337.63             |
| <b>INT-4</b>            | 0.699479     | 0.743648          | 0.744592          | 0.622505          | -1862.590483      | —                   |
| <b>TS-4</b>             | 0.697777     | 0.741324          | 0.742268          | 0.622042          | -1862.555455      | -420.71             |
| <b>INT-5</b>            | 0.702989     | 0.745772          | 0.746717          | 0.628405          | -1862.655912      | —                   |
| <b>TS-5</b>             | 0.762009     | 0.810191          | 0.811135          | 0.680714          | -2091.686754      | -814.92             |
| <b>INT-1i</b>           | 0.697183     | 0.741956          | 0.742900          | 0.618325          | -1862.493430      | —                   |
| <b>TS-1i</b>            | 0.696121     | 0.740413          | 0.741357          | 0.615375          | -1862.478477      | -418.85             |

|                |          |          |          |          |              |         |
|----------------|----------|----------|----------|----------|--------------|---------|
| <b>INT-2i</b>  | 0.699082 | 0.743086 | 0.744031 | 0.622471 | -1862.518971 | —       |
| <b>INT-4i</b>  | 0.697727 | 0.741979 | 0.742923 | 0.620559 | -1862.499250 | —       |
| <b>TS-4i</b>   | 0.696831 | 0.740521 | 0.741465 | 0.620365 | -1862.499285 | -117.19 |
| <b>TS-3ii</b>  | 0.699916 | 0.742212 | 0.743156 | 0.626679 | -1862.497687 | -346.82 |
| <b>INT-4ii</b> | 0.701289 | 0.744034 | 0.744978 | 0.626925 | -1862.526865 | —       |
| <b>TS-4ii</b>  | 0.698362 | 0.741452 | 0.742396 | 0.623915 | -1862.492084 | -206.45 |
| <b>INT-5ii</b> | 0.699254 | 0.742782 | 0.743726 | 0.624153 | -1862.499161 | —       |
| <b>TS-5ii</b>  | 0.698997 | 0.741767 | 0.742711 | 0.625238 | -1862.499647 | -43.72  |
| <b>INT-6ii</b> | 0.702888 | 0.745818 | 0.746763 | 0.627027 | -1862.654825 | —       |

### Cartesian coordinates of the optimized structures

#### 2a

|   |             |             |             |
|---|-------------|-------------|-------------|
| C | -2.02220200 | 0.15719600  | 0.10039900  |
| C | -0.99847200 | -0.43573200 | 0.36197800  |
| C | 0.22324800  | -1.17598900 | 0.70323700  |
| O | 0.30127400  | -1.44493700 | 2.10497400  |
| H | -0.60312600 | -1.57499500 | 2.41683800  |
| H | 0.21086800  | -2.12618000 | 0.14355200  |
| C | 1.46415800  | -0.40087800 | 0.28141900  |
| C | 2.11139100  | 0.44751100  | 1.18190800  |
| C | 1.93896400  | -0.50958700 | -1.02798000 |
| C | 3.22588800  | 1.18015300  | 0.77312600  |
| H | 1.74179000  | 0.51199300  | 2.19859600  |
| C | 3.04981400  | 0.22651500  | -1.43794000 |
| H | 1.43553600  | -1.17124100 | -1.72841000 |
| C | 3.69667000  | 1.07403600  | -0.53661400 |
| H | 3.72864300  | 1.83429100  | 1.47963900  |
| H | 3.41350200  | 0.13408900  | -2.45708500 |
| H | 4.56528300  | 1.64429800  | -0.85235200 |
| C | -3.22524300 | 0.87440900  | -0.21963100 |
| C | -4.10860800 | 0.39582200  | -1.36369400 |
| C | -4.58324100 | 0.23999800  | 0.04919300  |
| H | -3.16952200 | 1.95180500  | -0.08212200 |
| H | -3.78287200 | -0.49152100 | -1.89525700 |
| H | -4.56604100 | 1.15829300  | -1.98573500 |
| H | -5.37108900 | 0.89388500  | 0.40894500  |
| H | -4.58367600 | -0.75454900 | 0.48195600  |

#### PC1

|   |             |             |             |
|---|-------------|-------------|-------------|
| C | -0.21465000 | -0.44290600 | 0.29859000  |
| C | -0.60680300 | 0.85145900  | 0.02590000  |
| C | 2.12320800  | 0.13895800  | -0.07727500 |
| C | 1.16847400  | -0.79571900 | 0.22453900  |



|   |             |             |             |
|---|-------------|-------------|-------------|
| H | 1.46838400  | -1.80894600 | 0.45597900  |
| N | 1.71454200  | 1.43301800  | -0.27175600 |
| H | 2.39139300  | 2.15348800  | -0.48860400 |
| C | 0.39880600  | 1.88582100  | -0.17223800 |
| O | 0.16097200  | 3.09811400  | -0.24645000 |
| C | 3.56658100  | -0.14738800 | -0.16932600 |
| C | 4.52107800  | 0.79632200  | 0.24364100  |
| C | 4.00919300  | -1.38066400 | -0.67363400 |
| C | 5.88228000  | 0.51324200  | 0.15249200  |
| H | 4.20110200  | 1.74087800  | 0.67406500  |
| C | 5.36974200  | -1.66240300 | -0.75921000 |
| H | 3.27983400  | -2.10484000 | -1.02088800 |
| C | 6.31137200  | -0.71612800 | -0.34913200 |
| H | 6.60733600  | 1.25017500  | 0.48365700  |
| H | 5.69636600  | -2.61776700 | -1.15815700 |
| H | 7.37204400  | -0.93553800 | -0.42047500 |
| C | -1.16882600 | -1.52417900 | 0.70771300  |
| C | -0.88156000 | -2.31743900 | 1.96404800  |
| C | -2.03813200 | -1.35067600 | 1.92310300  |
| H | -1.61126500 | -2.07304700 | -0.11977000 |
| H | -0.01035000 | -2.03980700 | 2.55042800  |
| H | -1.09382600 | -3.38204700 | 1.95606100  |
| H | -3.04742600 | -1.74288600 | 1.87344000  |
| H | -1.94783800 | -0.41054600 | 2.45678800  |
| C | -2.01527700 | 1.42467300  | 0.02206100  |
| H | -1.98608100 | 2.22845600  | -0.72698300 |
| O | -2.30942900 | 2.01304000  | 1.29256900  |
| H | -1.72565000 | 2.78347000  | 1.34830000  |
| C | -3.12842500 | 0.48875900  | -0.39096400 |
| C | -4.30227400 | 0.38511400  | 0.35790400  |
| C | -3.01756000 | -0.23222100 | -1.58626700 |
| C | -5.33582900 | -0.45311400 | -0.06479900 |
| H | -4.38981200 | 0.95952000  | 1.27204300  |
| C | -4.04770600 | -1.06979000 | -2.00819500 |
| H | -2.11152400 | -0.14322200 | -2.17996100 |
| C | -5.21126100 | -1.18799500 | -1.24371100 |
| H | -6.24140300 | -0.53078400 | 0.53027100  |
| H | -3.94479800 | -1.62818200 | -2.93426600 |
| H | -6.01522000 | -1.84107700 | -1.57003200 |

**PC2**

|   |             |             |             |
|---|-------------|-------------|-------------|
| C | -0.32606800 | 0.55823600  | -0.19576700 |
| C | -0.73376200 | -0.68086100 | -0.63272000 |
| C | 2.02019200  | -0.25582300 | -0.09099500 |

|   |             |             |             |
|---|-------------|-------------|-------------|
| C | 1.06340000  | 0.72042600  | 0.07500500  |
| H | 1.37400800  | 1.68893300  | 0.45382200  |
| C | 3.45026200  | 0.01167700  | 0.16817000  |
| C | 4.31855000  | -0.99268200 | 0.63251400  |
| C | 3.97238600  | 1.30292200  | -0.03032600 |
| C | 5.65216300  | -0.70089400 | 0.91181700  |
| H | 3.93989800  | -1.99778100 | 0.75870700  |
| C | 5.30548000  | 1.58995300  | 0.24855400  |
| H | 3.33338700  | 2.08286700  | -0.43267000 |
| C | 6.15246600  | 0.58828800  | 0.72617900  |
| H | 6.30477500  | -1.48926800 | 1.27545800  |
| H | 5.68605100  | 2.59326400  | 0.08087800  |
| H | 7.19407500  | 0.80852600  | 0.94023100  |
| C | -1.26896500 | 1.69064000  | 0.06100800  |
| C | -0.90682500 | 3.09087400  | -0.38272600 |
| C | -2.03400500 | 2.35540100  | -1.05636000 |
| H | -1.80337000 | 1.62240300  | 1.00617700  |
| H | 0.01366400  | 3.22182800  | -0.94418000 |
| H | -1.14358200 | 3.91457500  | 0.28308900  |
| H | -3.05561200 | 2.65545800  | -0.84885200 |
| H | -1.87586000 | 1.97351100  | -2.05753200 |
| C | -2.14459700 | -1.08574500 | -1.02980700 |
| H | -2.14977500 | -2.18873400 | -1.09579600 |
| O | -2.50511000 | -0.54293300 | -2.29662900 |
| H | -1.80748800 | -0.76967300 | -2.92440100 |
| C | -3.19476700 | -0.69746100 | -0.00681100 |
| C | -4.37824800 | -0.06555800 | -0.39163500 |
| C | -2.98723600 | -1.00832500 | 1.34161900  |
| C | -5.33622800 | 0.26867000  | 0.56723700  |
| H | -4.53531400 | 0.17042700  | -1.43671700 |
| C | -3.94449400 | -0.67531200 | 2.29754100  |
| H | -2.06557000 | -1.49690400 | 1.64632000  |
| C | -5.12263900 | -0.03128300 | 1.91240700  |
| H | -6.25124200 | 0.76645400  | 0.25996400  |
| H | -3.76943700 | -0.91510400 | 3.34195900  |
| H | -5.86809100 | 0.23235800  | 2.65648600  |
| N | 0.21155900  | -1.66249800 | -0.78495500 |
| C | 1.58990400  | -1.58177500 | -0.53164400 |
| O | 2.27902200  | -2.58888200 | -0.69695100 |
| H | -0.07453400 | -2.58933300 | -1.07918600 |

**HOAc**

|   |             |            |             |
|---|-------------|------------|-------------|
| C | -0.09230100 | 0.12513500 | -0.00000800 |
| O | -0.64460700 | 1.20202200 | -0.00003500 |

|   |             |             |             |
|---|-------------|-------------|-------------|
| O | -0.77806500 | -1.04599300 | -0.00001400 |
| H | -1.71910600 | -0.80340100 | -0.00004500 |
| C | 1.39615600  | -0.10987700 | 0.00004900  |
| H | 1.68113500  | -0.69192000 | 0.88127100  |
| H | 1.68119400  | -0.69199000 | -0.88110800 |
| H | 1.91502700  | 0.84752600  | 0.00003000  |

**Cp\*Rh(OAc)(OPiv)**

|    |             |             |             |
|----|-------------|-------------|-------------|
| Rh | -0.65129200 | 0.22273500  | 0.06702300  |
| C  | -1.52749800 | -1.37448400 | -1.10742300 |
| C  | -1.13011000 | -1.90473100 | 0.16483300  |
| C  | -1.82682100 | -1.17681000 | 1.19154100  |
| C  | -2.72368600 | -0.23264200 | 0.53679100  |
| C  | -2.53599900 | -0.34861900 | -0.86962600 |
| C  | 0.02498300  | 2.65084100  | -0.09569600 |
| O  | -0.43609400 | 2.17903700  | 0.99455200  |
| O  | -0.00695800 | 1.91488400  | -1.13485300 |
| O  | 1.34649400  | 0.10731200  | 0.54028500  |
| C  | 2.16817200  | -0.49329700 | -0.27495500 |
| O  | 1.84682200  | -1.14834400 | -1.26986700 |
| C  | -3.63538200 | 0.70747000  | 1.25765800  |
| H  | -4.50280900 | 0.16765800  | 1.65574300  |
| H  | -3.11727000 | 1.18237400  | 2.09436600  |
| H  | -3.99920100 | 1.49741500  | 0.59869800  |
| C  | -3.22229000 | 0.43651300  | -1.94148500 |
| H  | -4.00435700 | -0.16741500 | -2.41676400 |
| H  | -3.68660000 | 1.33935500  | -1.54090200 |
| H  | -2.51271700 | 0.73963900  | -2.71474800 |
| C  | -1.73377900 | -1.39985900 | 2.66720500  |
| H  | -1.87413300 | -0.46440200 | 3.21374500  |
| H  | -2.50367700 | -2.10622900 | 3.00215800  |
| H  | -0.75886800 | -1.80548400 | 2.94365800  |
| C  | -0.13621600 | -3.00000000 | 0.37854200  |
| H  | 0.31964600  | -2.92944000 | 1.36803600  |
| H  | -0.63477700 | -3.97413500 | 0.30243600  |
| H  | 0.65736000  | -2.94068000 | -0.36610900 |
| C  | -1.03790900 | -1.84207100 | -2.43946100 |
| H  | 0.04725600  | -1.95396100 | -2.41219300 |
| H  | -1.49946900 | -2.80255300 | -2.70030200 |
| H  | -1.28653700 | -1.12365600 | -3.22307500 |
| C  | 0.64440400  | 4.01835800  | -0.14263300 |
| H  | 1.71502100  | 3.91481800  | 0.06366600  |
| H  | 0.52740500  | 4.45728000  | -1.13506800 |
| H  | 0.20598200  | 4.66411000  | 0.62011100  |

|   |            |             |             |
|---|------------|-------------|-------------|
| C | 3.64777700 | -0.31203600 | 0.13499900  |
| C | 3.96133800 | 1.19614200  | 0.17508100  |
| C | 3.84377900 | -0.91829000 | 1.53792100  |
| C | 4.55792200 | -1.01616000 | -0.87750000 |
| H | 3.79740500 | 1.65467800  | -0.80614100 |
| H | 3.32234000 | 1.70218200  | 0.90254000  |
| H | 5.00868300 | 1.35870400  | 0.45396500  |
| H | 3.61289800 | -1.98970800 | 1.53670800  |
| H | 4.88441400 | -0.80049000 | 1.86029000  |
| H | 3.19352300 | -0.42700800 | 2.26550700  |
| H | 5.60737200 | -0.89776800 | -0.58517300 |
| H | 4.32977200 | -2.08356500 | -0.93361600 |
| H | 4.42528300 | -0.59986100 | -1.87925700 |

**INT-0**

|    |             |             |             |
|----|-------------|-------------|-------------|
| N  | 0.01654200  | 0.73713200  | 0.79908100  |
| C  | 2.21403700  | 0.04810700  | 0.21266500  |
| C  | 1.55462400  | -1.11307800 | 0.02194600  |
| C  | -2.60105800 | -1.28127100 | -0.50124900 |
| C  | -1.56454600 | -1.73930000 | -1.43037100 |
| C  | -0.93030700 | -2.91111900 | -0.86156500 |
| C  | -1.43667500 | -3.05773100 | 0.45665600  |
| C  | -2.49870900 | -2.06138900 | 0.65914300  |
| Rh | -0.45467500 | -1.09113200 | 0.26294300  |
| C  | 1.30571300  | 1.21358800  | 0.52613400  |
| O  | 1.60617600  | 2.39660900  | 0.52680900  |
| C  | -3.30264200 | -1.93269800 | 1.91369000  |
| H  | -4.04654900 | -2.73618300 | 1.98148400  |
| H  | -2.66536500 | -2.00035100 | 2.79987800  |
| H  | -3.83142200 | -0.97863300 | 1.95269700  |
| C  | -3.55751900 | -0.16449800 | -0.77384400 |
| H  | -4.43155000 | -0.53255900 | -1.32529900 |
| H  | -3.91457000 | 0.29008500  | 0.15314700  |
| H  | -3.08325200 | 0.61415700  | -1.37191400 |
| C  | -1.34191200 | -1.17428800 | -2.79571300 |
| H  | -2.14829600 | -1.48512800 | -3.47261100 |
| H  | -1.32038800 | -0.08279000 | -2.75645400 |
| H  | -0.39474100 | -1.51757100 | -3.21557000 |
| C  | 0.09728600  | -3.76598700 | -1.53370300 |
| H  | -0.38087100 | -4.53591600 | -2.15043000 |
| H  | 0.74456800  | -3.17014600 | -2.18121100 |
| H  | 0.73404900  | -4.27047900 | -0.80331000 |
| C  | -1.06812500 | -4.11322600 | 1.45045000  |
| H  | -1.77592800 | -4.95094700 | 1.40626600  |

|   |             |             |             |
|---|-------------|-------------|-------------|
| H | -0.06823100 | -4.50784900 | 1.25992000  |
| H | -1.08542900 | -3.71949300 | 2.46986100  |
| O | -0.91648500 | 1.79566200  | 0.94213100  |
| C | -1.30080900 | 2.38531000  | -0.22682100 |
| O | -1.02615300 | 1.95432800  | -1.32538800 |
| C | -2.08547900 | 3.66650000  | 0.05260800  |
| C | -3.05303500 | 3.48276800  | 1.23548700  |
| H | -2.51925900 | 3.22111900  | 2.15058100  |
| H | -3.60005100 | 4.41562100  | 1.40590100  |
| H | -3.78749600 | 2.69686500  | 1.02866800  |
| C | -1.03353700 | 4.74753200  | 0.39486700  |
| H | -0.35024400 | 4.90331800  | -0.44442000 |
| H | -1.53913500 | 5.69411200  | 0.61280600  |
| H | -0.43677400 | 4.45133500  | 1.25983600  |
| C | -2.85757100 | 4.05908500  | -1.21377900 |
| H | -2.18497100 | 4.15469000  | -2.06828200 |
| H | -3.61522300 | 3.30946700  | -1.46432800 |
| H | -3.36514600 | 5.01561800  | -1.05525500 |
| C | 3.67664800  | 0.22811900  | 0.12283000  |
| C | 4.25206700  | 1.41732500  | -0.35903700 |
| C | 4.53239800  | -0.82450000 | 0.49448100  |
| C | 5.63561100  | 1.53453100  | -0.47965300 |
| H | 3.60582000  | 2.24194400  | -0.62958600 |
| C | 5.91358600  | -0.70513400 | 0.36858000  |
| H | 4.10300900  | -1.73393500 | 0.90393900  |
| C | 6.47274700  | 0.47666000  | -0.12197200 |
| H | 6.06165800  | 2.45914400  | -0.85877000 |
| H | 6.55521300  | -1.52991700 | 0.66579100  |
| H | 7.55035600  | 0.57417300  | -0.21622100 |
| H | 2.08975800  | -2.01336200 | -0.28250300 |

**INT-1**

|    |             |             |             |
|----|-------------|-------------|-------------|
| N  | -0.21836000 | -0.12677100 | 1.02944200  |
| C  | 2.06749300  | -0.53452900 | 0.81990800  |
| C  | 2.00724900  | 0.64607200  | 0.17837000  |
| C  | 0.00572000  | 3.09562300  | 1.28386800  |
| C  | 0.94630000  | 3.53164200  | 0.28573300  |
| C  | 0.26235500  | 3.58047400  | -0.97190500 |
| C  | -1.13698300 | 3.27260400  | -0.73335100 |
| C  | -1.29599300 | 2.97681900  | 0.64286900  |
| Rh | 0.19089800  | 1.47326800  | -0.19783200 |
| C  | 0.73227300  | -1.09849100 | 1.20548700  |
| O  | 0.50815600  | -2.23797600 | 1.62335000  |
| C  | -2.57872500 | 2.63743600  | 1.33579200  |

|   |             |             |             |
|---|-------------|-------------|-------------|
| H | -3.11457400 | 3.55320900  | 1.61489900  |
| H | -3.23078000 | 2.04999800  | 0.68491500  |
| H | -2.39097000 | 2.06802100  | 2.24675100  |
| C | 0.26558500  | 2.89764500  | 2.74462100  |
| H | -0.12222500 | 3.74321700  | 3.32588000  |
| H | -0.21336600 | 1.98079000  | 3.09687600  |
| H | 1.33565400  | 2.81339800  | 2.94379000  |
| C | 2.38315300  | 3.87441200  | 0.52228000  |
| H | 2.48825100  | 4.94053100  | 0.75527400  |
| H | 2.79509300  | 3.30459700  | 1.35751200  |
| H | 2.99549800  | 3.66611700  | -0.35878800 |
| C | 0.83806400  | 3.99609400  | -2.29034100 |
| H | 0.60216400  | 5.04421100  | -2.51106800 |
| H | 1.92523500  | 3.89033600  | -2.29895600 |
| H | 0.43579900  | 3.38579600  | -3.10336900 |
| C | -2.21758200 | 3.28809900  | -1.76869500 |
| H | -2.68011300 | 4.28105300  | -1.82809700 |
| H | -1.81585400 | 3.05128000  | -2.75713700 |
| H | -2.98864300 | 2.55311700  | -1.53295300 |
| O | -1.53211600 | -0.66442500 | 1.19612600  |
| C | -1.98558300 | -0.65082100 | 2.49435300  |
| O | -1.47861400 | 0.00691000  | 3.37070400  |
| C | -3.15185400 | -1.61906100 | 2.68333800  |
| C | -3.96979200 | -1.83625500 | 1.39998400  |
| H | -3.37477600 | -2.29449700 | 0.60798800  |
| H | -4.80662800 | -2.50577100 | 1.62300500  |
| H | -4.38744900 | -0.90017800 | 1.01687200  |
| C | -2.49231600 | -2.95393500 | 3.11024600  |
| H | -1.97991100 | -2.84048600 | 4.06945300  |
| H | -3.26440900 | -3.72333900 | 3.21396700  |
| H | -1.75403100 | -3.27270500 | 2.37122600  |
| C | -4.05130500 | -1.08292700 | 3.80693300  |
| H | -3.46915800 | -0.88303100 | 4.70834600  |
| H | -4.54508200 | -0.15247400 | 3.50708600  |
| H | -4.82675900 | -1.81850900 | 4.04136500  |
| C | 0.61843500  | 0.47219500  | -2.13404000 |
| C | -0.59040000 | 0.32293800  | -1.84641600 |
| C | -1.95688200 | -0.21537800 | -2.11798300 |
| O | -2.89979200 | 0.10214100  | -1.10949900 |
| H | -2.52640800 | -0.20105700 | -0.26286700 |
| H | -2.33142400 | 0.27424400  | -3.02414200 |
| C | -1.83321600 | -1.70756100 | -2.40438300 |
| C | -1.29757700 | -2.58320100 | -1.44830200 |
| C | -2.22444600 | -2.21019800 | -3.64767800 |

|   |             |             |             |
|---|-------------|-------------|-------------|
| C | -1.16925100 | -3.93974200 | -1.73699900 |
| H | -0.97488900 | -2.21840000 | -0.48100900 |
| C | -2.08905700 | -3.56990100 | -3.93875600 |
| H | -2.63758600 | -1.53459400 | -4.39261900 |
| C | -1.56157200 | -4.43723800 | -2.98300200 |
| H | -0.75152500 | -4.60418100 | -0.98679400 |
| H | -2.39623100 | -3.94774800 | -4.90952100 |
| H | -1.45368500 | -5.49433200 | -3.20687100 |
| C | 3.31549700  | -1.26597500 | 1.12463400  |
| C | 3.39861600  | -2.15133500 | 2.21314900  |
| C | 4.46196900  | -1.07651400 | 0.33241400  |
| C | 4.59371300  | -2.80785500 | 2.50235500  |
| H | 2.51623600  | -2.32865300 | 2.81408600  |
| C | 5.65547400  | -1.72988200 | 0.62666700  |
| H | 4.40757800  | -0.42103700 | -0.53071700 |
| C | 5.72782100  | -2.60012700 | 1.71621600  |
| H | 4.63779600  | -3.48672300 | 3.34928800  |
| H | 6.52709000  | -1.56890100 | -0.00178200 |
| H | 6.65585700  | -3.11624700 | 1.94405500  |
| H | 2.89994600  | 1.16907900  | -0.15960500 |
| C | 1.85395200  | 0.19838200  | -2.83635900 |
| C | 2.46101900  | -1.18984300 | -2.70839800 |
| C | 1.79209500  | -0.79508500 | -3.98956600 |
| H | 2.54783800  | 1.02857700  | -2.93164900 |
| H | 1.94488000  | -1.88314200 | -2.05409200 |
| H | 3.54318800  | -1.25827900 | -2.68080900 |
| H | 2.40722700  | -0.58257900 | -4.85827500 |
| H | 0.82267800  | -1.23108000 | -4.20887800 |

**TS-1**

|    |             |             |             |
|----|-------------|-------------|-------------|
| N  | -0.05820500 | 0.18206400  | 1.06900600  |
| C  | 2.03204500  | -0.71822300 | 0.56023000  |
| C  | 1.96069200  | 0.08027600  | -0.54296600 |
| C  | 0.54245800  | 3.37106200  | 0.50461000  |
| C  | 1.46179900  | 3.36894800  | -0.57454800 |
| C  | 0.71109200  | 3.20834600  | -1.80667000 |
| C  | -0.69094000 | 3.19811600  | -1.47652900 |
| C  | -0.80402100 | 3.24385600  | -0.05564600 |
| Rh | 0.32300100  | 1.41396100  | -0.55895300 |
| C  | 0.72192500  | -0.92221400 | 1.26461000  |
| O  | 0.40493600  | -1.93545200 | 1.89763700  |
| C  | -2.07503700 | 3.28968700  | 0.73411000  |
| H  | -2.43299500 | 4.32316100  | 0.82614500  |
| H  | -2.85699000 | 2.70289300  | 0.24732400  |

|   |             |             |             |
|---|-------------|-------------|-------------|
| H | -1.92153900 | 2.89983100  | 1.74161400  |
| C | 0.84650300  | 3.48402000  | 1.96518000  |
| H | 0.55360600  | 4.47107500  | 2.34390500  |
| H | 0.30724000  | 2.72155800  | 2.53320600  |
| H | 1.91371500  | 3.35460400  | 2.15700500  |
| C | 2.95216700  | 3.47989500  | -0.48231300 |
| H | 3.27778000  | 4.51361000  | -0.64991800 |
| H | 3.31368600  | 3.16687800  | 0.49905300  |
| H | 3.44525300  | 2.85504400  | -1.23203200 |
| C | 1.29050500  | 3.20489800  | -3.18769500 |
| H | 1.37138200  | 4.22406800  | -3.58628300 |
| H | 2.29265900  | 2.76848900  | -3.19550400 |
| H | 0.66922300  | 2.62645300  | -3.87564900 |
| C | -1.83147100 | 3.14491000  | -2.44561400 |
| H | -2.20854900 | 4.15472000  | -2.64935800 |
| H | -1.51987200 | 2.71091000  | -3.39893700 |
| H | -2.64644100 | 2.53817600  | -2.04751900 |
| O | -1.41374000 | -0.10875700 | 1.44571300  |
| C | -1.75282200 | 0.29362900  | 2.70785600  |
| O | -1.08569700 | 1.04843400  | 3.37583200  |
| C | -3.03784700 | -0.39350500 | 3.16883300  |
| C | -4.01437400 | -0.65717000 | 2.01002500  |
| H | -3.59864200 | -1.34574500 | 1.27246100  |
| H | -4.92964700 | -1.10485900 | 2.41012200  |
| H | -4.29520900 | 0.26858400  | 1.49741600  |
| C | -2.57702600 | -1.74033600 | 3.77833200  |
| H | -1.95316300 | -1.57066000 | 4.66048000  |
| H | -3.45366000 | -2.32355200 | 4.07887500  |
| H | -1.98916400 | -2.31133400 | 3.05602700  |
| C | -3.70394900 | 0.48074400  | 4.24028000  |
| H | -3.00237800 | 0.71485400  | 5.04302000  |
| H | -4.05789600 | 1.42540800  | 3.81423000  |
| H | -4.56520700 | -0.04497000 | 4.66394200  |
| C | 0.66452300  | -0.54578300 | -1.83303500 |
| C | -0.53259000 | -0.12230800 | -1.62398400 |
| C | -1.97342200 | -0.40106900 | -1.91461300 |
| O | -2.83699900 | 0.32971400  | -1.04437100 |
| H | -2.49637300 | 0.19893800  | -0.14323500 |
| H | -2.21168900 | -0.03687400 | -2.92107700 |
| C | -2.25058900 | -1.89590800 | -1.86189500 |
| C | -1.86787600 | -2.65591700 | -0.74635000 |
| C | -2.89027100 | -2.52676600 | -2.93153900 |
| C | -2.12078100 | -4.02561600 | -0.71425900 |
| H | -1.35890600 | -2.19205500 | 0.09107800  |



|   |             |             |             |
|---|-------------|-------------|-------------|
| C | -3.13906100 | -3.90075300 | -2.90033100 |
| H | -3.18739400 | -1.94083100 | -3.79761500 |
| C | -2.75272800 | -4.65314600 | -1.79136400 |
| H | -1.81195800 | -4.60323600 | 0.15170700  |
| H | -3.63055200 | -4.38040700 | -3.74169100 |
| H | -2.94033300 | -5.72244400 | -1.76622700 |
| C | 3.25050000  | -1.37624200 | 1.04632900  |
| C | 3.34819500  | -1.81741800 | 2.37987100  |
| C | 4.35642700  | -1.57226200 | 0.19653800  |
| C | 4.51891800  | -2.41019500 | 2.84566600  |
| H | 2.49445900  | -1.70405600 | 3.03566300  |
| C | 5.52312100  | -2.16650100 | 0.66572000  |
| H | 4.28796200  | -1.27690900 | -0.84514200 |
| C | 5.61200300  | -2.58564800 | 1.99556200  |
| H | 4.57593000  | -2.74024000 | 3.87874800  |
| H | 6.36188100  | -2.31267800 | -0.00883300 |
| H | 6.52134300  | -3.05290400 | 2.36157700  |
| H | 2.85436400  | 0.31782200  | -1.11406400 |
| C | 1.50279400  | -1.43003000 | -2.66026900 |
| C | 1.89618600  | -2.78727000 | -2.12357200 |
| C | 0.89497700  | -2.69188400 | -3.24318400 |
| H | 2.24083500  | -0.91519300 | -3.27204400 |
| H | 1.51887200  | -3.03958400 | -1.13731600 |
| H | 2.89612700  | -3.15238400 | -2.33470000 |
| H | 1.20545800  | -2.96662000 | -4.24668700 |
| H | -0.14096800 | -2.90707000 | -3.01266100 |

**INT-2**

|    |             |             |             |
|----|-------------|-------------|-------------|
| N  | 0.06626100  | -0.22355700 | 1.28119600  |
| C  | -1.56233200 | 1.27794200  | 0.75606700  |
| C  | -1.38115700 | 1.78811000  | -0.52900700 |
| C  | -0.79628300 | -2.41973000 | -1.69571400 |
| C  | -1.66678700 | -2.62633200 | -0.54778200 |
| C  | -2.80554000 | -1.80721600 | -0.68586600 |
| C  | -2.62414400 | -1.01923500 | -1.89635300 |
| C  | -1.41599500 | -1.44314900 | -2.54390300 |
| Rh | -0.91306700 | -0.44565800 | -0.62722000 |
| C  | -0.31007300 | 1.03689000  | 1.60060500  |
| O  | 0.18795700  | 1.87749000  | 2.34005700  |
| C  | -0.91284200 | -0.99795800 | -3.88152600 |
| H  | -1.28973200 | -1.65670300 | -4.67400600 |
| H  | -1.23862800 | 0.02007400  | -4.10767900 |
| H  | 0.17778300  | -1.01787200 | -3.89544700 |
| C  | 0.33238500  | -3.32757500 | -2.06797700 |

|   |             |             |             |
|---|-------------|-------------|-------------|
| H | -0.07947300 | -4.26494000 | -2.46583400 |
| H | 0.96762200  | -2.87865600 | -2.83033200 |
| H | 0.95220800  | -3.56785100 | -1.20468300 |
| C | -1.35859100 | -3.57028100 | 0.56952500  |
| H | -1.56438400 | -4.60513000 | 0.26953600  |
| H | -0.30169400 | -3.50014500 | 0.83691200  |
| H | -1.95607900 | -3.34859300 | 1.45614800  |
| C | -4.00677900 | -1.77182800 | 0.20321800  |
| H | -4.77591800 | -2.46179100 | -0.16694500 |
| H | -3.75751000 | -2.06606500 | 1.22389400  |
| H | -4.45019600 | -0.77583200 | 0.24997500  |
| C | -3.63514000 | -0.06372600 | -2.44850600 |
| H | -4.39302400 | -0.60686200 | -3.02687200 |
| H | -4.15478500 | 0.47062200  | -1.64932800 |
| H | -3.17190900 | 0.66890100  | -3.11306800 |
| O | 1.34984800  | -0.50315800 | 1.86231900  |
| C | 2.09221000  | -1.46101400 | 1.31696900  |
| O | 1.80063000  | -2.08095500 | 0.30279200  |
| C | 3.35250800  | -1.75298000 | 2.13418300  |
| C | 3.61182800  | -0.70647300 | 3.22608400  |
| H | 2.78871900  | -0.65869800 | 3.94252600  |
| H | 4.52694200  | -0.97040300 | 3.76647300  |
| H | 3.74141100  | 0.28676200  | 2.79235900  |
| C | 3.13210900  | -3.14408600 | 2.76967400  |
| H | 2.93168500  | -3.89449000 | 2.00034000  |
| H | 4.02853400  | -3.44180400 | 3.32264600  |
| H | 2.29071500  | -3.12904300 | 3.47068200  |
| C | 4.53825100  | -1.80937400 | 1.15325900  |
| H | 4.34768400  | -2.53116200 | 0.35592600  |
| H | 4.71813000  | -0.83340600 | 0.69779900  |
| H | 5.44294800  | -2.11089700 | 1.69089900  |
| C | -0.03994100 | 2.05348000  | -1.13444600 |
| C | 0.51885800  | 0.85622600  | -1.33975700 |
| C | 1.86781200  | 0.54819800  | -1.93834800 |
| O | 2.03229100  | -0.82884800 | -2.25849900 |
| H | 1.95167600  | -1.31633800 | -1.41742400 |
| H | 1.92239200  | 1.05846900  | -2.91105400 |
| C | 3.05894000  | 1.04581900  | -1.10984800 |
| C | 4.34134100  | 0.81695700  | -1.63123900 |
| C | 2.93780000  | 1.70771400  | 0.11398400  |
| C | 5.47643700  | 1.25334500  | -0.95321000 |
| H | 4.43719500  | 0.27990900  | -2.56994000 |
| C | 4.07731100  | 2.14547000  | 0.79611900  |
| H | 1.96479700  | 1.88878400  | 0.54727900  |

|   |             |             |             |
|---|-------------|-------------|-------------|
| C | 5.34736400  | 1.92422500  | 0.26707300  |
| H | 6.46138400  | 1.06901000  | -1.37275300 |
| H | 3.95977300  | 2.65975800  | 1.74538300  |
| H | 6.23043900  | 2.26652800  | 0.79866500  |
| C | -2.87783800 | 1.16830000  | 1.42141000  |
| C | -2.99822000 | 0.40601100  | 2.59575500  |
| C | -4.02153800 | 1.81899300  | 0.92884700  |
| C | -4.22459800 | 0.28199700  | 3.24269300  |
| H | -2.12317700 | -0.10248200 | 2.98590500  |
| C | -5.25006200 | 1.68908600  | 1.57417100  |
| H | -3.95016600 | 2.44903100  | 0.04886800  |
| C | -5.35840200 | 0.91722500  | 2.73234900  |
| H | -4.29549500 | -0.31271600 | 4.14841900  |
| H | -6.12074800 | 2.20349900  | 1.17860800  |
| H | -6.31420900 | 0.82189500  | 3.23806400  |
| H | -2.26117000 | 2.07879400  | -1.09864100 |
| C | 0.48136300  | 3.42133700  | -1.36518200 |
| C | -0.42419400 | 4.62776700  | -1.22705400 |
| C | 0.61829100  | 4.36309000  | -0.17848800 |
| H | 1.27080500  | 3.48488800  | -2.10931900 |
| H | -1.46288800 | 4.45546200  | -0.95910000 |
| H | -0.27614600 | 5.45269400  | -1.91684500 |
| H | 1.49863700  | 4.99705900  | -0.14748100 |
| H | 0.29810600  | 3.97969200  | 0.78590900  |

**TS-2**

|    |             |             |             |
|----|-------------|-------------|-------------|
| N  | -0.15153500 | 0.05994200  | 1.29524800  |
| C  | -1.70647000 | 1.63810600  | 0.48862600  |
| C  | -1.48757700 | 1.92732600  | -0.81910900 |
| C  | -0.52657000 | -2.85251200 | -1.37372300 |
| C  | -1.38683100 | -2.98297400 | -0.18952900 |
| C  | -2.50838700 | -2.17225300 | -0.38026900 |
| C  | -2.36848300 | -1.51410800 | -1.69383200 |
| C  | -1.19150500 | -2.01187700 | -2.33791200 |
| Rh | -0.65472900 | -0.85754000 | -0.59761200 |
| C  | -0.49904200 | 1.36631400  | 1.37960700  |
| O  | 0.00884900  | 2.26479100  | 2.05161300  |
| C  | -0.72508500 | -1.72461400 | -3.73025700 |
| H  | -1.04885700 | -2.51370800 | -4.42004800 |
| H  | -1.12868900 | -0.77463900 | -4.08747100 |
| H  | 0.36380800  | -1.65518700 | -3.75198700 |
| C  | 0.69516500  | -3.67501300 | -1.61186600 |
| H  | 0.39220100  | -4.69310500 | -1.89075000 |
| H  | 1.30068500  | -3.25811700 | -2.41556000 |

|   |             |             |             |
|---|-------------|-------------|-------------|
| H | 1.30736700  | -3.73565800 | -0.71078400 |
| C | -1.01823000 | -3.78566400 | 1.01613800  |
| H | -1.10940000 | -4.85928500 | 0.81252600  |
| H | 0.01846600  | -3.58530600 | 1.29973900  |
| H | -1.65766900 | -3.54505700 | 1.86726300  |
| C | -3.64127600 | -1.93030200 | 0.56403500  |
| H | -4.53572600 | -2.47361200 | 0.23492700  |
| H | -3.39595200 | -2.26145100 | 1.57445500  |
| H | -3.89849100 | -0.87006600 | 0.61656300  |
| C | -3.40005400 | -0.62070000 | -2.30231300 |
| H | -4.15920900 | -1.22413300 | -2.81692100 |
| H | -3.90771300 | -0.02707100 | -1.54002200 |
| H | -2.95408100 | 0.05640800  | -3.03328800 |
| O | 1.04264600  | -0.16178600 | 2.07001800  |
| C | 1.89306100  | -1.06223200 | 1.59999500  |
| O | 1.72512400  | -1.70473800 | 0.56586600  |
| C | 3.09185700  | -1.28096400 | 2.52285800  |
| C | 3.26214500  | -0.14043400 | 3.53634000  |
| H | 2.39212600  | -0.04862100 | 4.18972200  |
| H | 4.14323600  | -0.33857800 | 4.15520300  |
| H | 3.40352800  | 0.81475500  | 3.02690800  |
| C | 2.83018400  | -2.61461600 | 3.25824800  |
| H | 2.70363800  | -3.43425600 | 2.54496600  |
| H | 3.67969600  | -2.84970700 | 3.90700700  |
| H | 1.93283500  | -2.55138500 | 3.88256800  |
| C | 4.34687700  | -1.40640100 | 1.64016400  |
| H | 4.23211000  | -2.21141500 | 0.91104200  |
| H | 4.54147900  | -0.47849600 | 1.09814100  |
| H | 5.21426600  | -1.62613000 | 2.27066500  |
| C | -0.16097200 | 1.84003700  | -1.48050100 |
| C | 0.44926400  | 0.63790700  | -1.47744200 |
| C | 1.84960900  | 0.40799200  | -2.00483900 |
| O | 2.14306800  | -0.98124000 | -2.19400500 |
| H | 2.12974500  | -1.36775300 | -1.30105900 |
| H | 1.91782100  | 0.83258000  | -3.01626000 |
| C | 2.96361000  | 1.04671000  | -1.16567900 |
| C | 4.28699700  | 0.84576000  | -1.58613600 |
| C | 2.73355600  | 1.79911100  | -0.01165400 |
| C | 5.35364400  | 1.39484900  | -0.87846300 |
| H | 4.47081200  | 0.24180300  | -2.46940800 |
| C | 3.80280100  | 2.34878800  | 0.70147500  |
| H | 1.72813600  | 1.96779900  | 0.34306500  |
| C | 5.11422700  | 2.15294800  | 0.27199400  |
| H | 6.37142700  | 1.23087800  | -1.22124800 |

|   |             |            |             |
|---|-------------|------------|-------------|
| H | 3.59601800  | 2.93219800 | 1.59377600  |
| H | 5.94356800  | 2.58290500 | 0.82614700  |
| C | -3.03387700 | 1.62238500 | 1.13380700  |
| C | -3.14446200 | 1.29260100 | 2.49685000  |
| C | -4.22205900 | 1.87372700 | 0.42065500  |
| C | -4.38974400 | 1.20099800 | 3.11491400  |
| H | -2.24465600 | 1.11034500 | 3.07298300  |
| C | -5.46562800 | 1.78215300 | 1.03936500  |
| H | -4.17800400 | 2.14563100 | -0.62833500 |
| C | -5.55805200 | 1.43842100 | 2.39023300  |
| H | -4.44554400 | 0.94285400 | 4.16824700  |
| H | -6.36580700 | 1.97966100 | 0.46461600  |
| H | -6.52838600 | 1.36293200 | 2.87120200  |
| H | -2.32322800 | 2.25531100 | -1.43569400 |
| C | 0.43045100  | 3.09998500 | -2.02154400 |
| C | -0.37668900 | 4.37613300 | -2.15020400 |
| C | 0.66353600  | 4.26340500 | -1.07155600 |
| H | 1.20451700  | 2.95543900 | -2.77005900 |
| H | -1.41869700 | 4.36422600 | -1.84691700 |
| H | -0.17266900 | 5.01149400 | -3.00665500 |
| H | 1.59110100  | 4.81719200 | -1.17349300 |
| H | 0.32427000  | 4.12584400 | -0.04877700 |

**INT-3**

|    |             |             |             |
|----|-------------|-------------|-------------|
| N  | -0.44370100 | 0.06397500  | 1.25322600  |
| C  | -2.09989200 | 1.44722700  | 0.24687300  |
| C  | -1.80862500 | 1.61875700  | -1.05936700 |
| C  | -0.65687900 | -3.39792500 | -0.07518600 |
| C  | -1.84400500 | -2.64532500 | -0.10945900 |
| C  | -1.89390900 | -1.92157100 | -1.37759500 |
| C  | -0.74460900 | -2.31493900 | -2.15799100 |
| C  | 0.05284300  | -3.15749600 | -1.33311300 |
| Rh | -0.11434700 | -1.17139100 | -0.38067300 |
| C  | -0.94323300 | 1.33154600  | 1.21427600  |
| O  | -0.56988900 | 2.29476400  | 1.88169500  |
| C  | 1.35615100  | -3.79141500 | -1.70471300 |
| H  | 1.19280100  | -4.81115200 | -2.07479500 |
| H  | 1.86359800  | -3.21657200 | -2.48007600 |
| H  | 2.02089200  | -3.85895000 | -0.83863400 |
| C  | -0.14485800 | -4.26497900 | 1.03330200  |
| H  | -0.21439600 | -5.32777300 | 0.77126300  |
| H  | 0.90684600  | -4.05028100 | 1.24820300  |
| H  | -0.71120400 | -4.11086700 | 1.95431100  |
| C  | -2.87535700 | -2.50759400 | 0.96477000  |

|   |             |             |             |
|---|-------------|-------------|-------------|
| H | -3.79692600 | -3.03038900 | 0.68277900  |
| H | -2.52649300 | -2.92096300 | 1.91285100  |
| H | -3.12585700 | -1.45632000 | 1.13009600  |
| C | -3.08793800 | -1.18871700 | -1.89685800 |
| H | -3.75028700 | -1.88129100 | -2.43297800 |
| H | -3.66057200 | -0.73479900 | -1.08796500 |
| H | -2.79393100 | -0.39950000 | -2.59029900 |
| C | -0.45325700 | -1.90664400 | -3.56761800 |
| H | -0.85925200 | -2.64037300 | -4.27494400 |
| H | -0.90277200 | -0.93598100 | -3.78596200 |
| H | 0.62236000  | -1.81565000 | -3.72786600 |
| O | 0.73300200  | 0.08264500  | 2.15347300  |
| C | 1.77534200  | -0.56069800 | 1.71062100  |
| O | 1.79706200  | -1.15493300 | 0.61154300  |
| C | 2.94875900  | -0.62843000 | 2.67681700  |
| C | 2.95787200  | 0.58215200  | 3.62376400  |
| H | 2.03917300  | 0.64170500  | 4.21029900  |
| H | 3.80599100  | 0.49276300  | 4.30952900  |
| H | 3.06432800  | 1.51169700  | 3.06106900  |
| C | 2.75913100  | -1.93539300 | 3.48364400  |
| H | 2.74339800  | -2.80708200 | 2.82245900  |
| H | 3.59165100  | -2.05116700 | 4.18412800  |
| H | 1.82812100  | -1.91302500 | 4.05787600  |
| C | 4.25415300  | -0.68917600 | 1.86684700  |
| H | 4.26504800  | -1.55348700 | 1.19904100  |
| H | 4.38703200  | 0.21205900  | 1.26505800  |
| H | 5.09955000  | -0.77300800 | 2.55634900  |
| C | -0.46104900 | 1.55027500  | -1.65066200 |
| C | 0.38860700  | 0.51460600  | -1.43425100 |
| C | 1.81389600  | 0.56169000  | -1.96359000 |
| O | 2.38315500  | -0.73876900 | -2.18403200 |
| H | 2.50381600  | -1.12341700 | -1.30324100 |
| H | 1.80947400  | 1.00128700  | -2.96799500 |
| C | 2.76772500  | 1.39975700  | -1.10349900 |
| C | 2.33775800  | 2.19459900  | -0.03721000 |
| C | 4.13608900  | 1.36648100  | -1.40887800 |
| C | 3.25427100  | 2.94548100  | 0.70360100  |
| H | 1.29052600  | 2.23623000  | 0.22576700  |
| C | 5.05150700  | 2.11618300  | -0.67215600 |
| H | 4.47552600  | 0.73640400  | -2.22469500 |
| C | 4.61278900  | 2.91166300  | 0.39028600  |
| H | 2.89321400  | 3.55774000  | 1.52473100  |
| H | 6.10735800  | 2.07915000  | -0.92533500 |
| H | 5.32380300  | 3.49726200  | 0.96573600  |

|   |             |            |             |
|---|-------------|------------|-------------|
| C | -3.45756500 | 1.47389200 | 0.82374400  |
| C | -3.63528500 | 1.45670900 | 2.22002500  |
| C | -4.61198300 | 1.47907800 | 0.01661400  |
| C | -4.91010500 | 1.44073400 | 2.78183700  |
| H | -2.76485500 | 1.48059900 | 2.86538600  |
| C | -5.88435600 | 1.46762900 | 0.58009200  |
| H | -4.51687000 | 1.48716300 | -1.06364300 |
| C | -6.04276600 | 1.44422600 | 1.96748700  |
| H | -5.01660800 | 1.43036700 | 3.86261900  |
| H | -6.75623200 | 1.47172200 | -0.06776000 |
| H | -7.03589800 | 1.42995200 | 2.40593300  |
| H | -2.61096700 | 1.89760300 | -1.73843300 |
| C | -0.05936500 | 2.75756300 | -2.45427700 |
| C | -0.98627800 | 3.92608200 | -2.72076700 |
| C | 0.14533000  | 4.08550700 | -1.74485200 |
| H | 0.65127900  | 2.56428800 | -3.25230000 |
| H | -1.99279500 | 3.90692100 | -2.31810300 |
| H | -0.90728500 | 4.40684200 | -3.69119400 |
| H | 1.00727500  | 4.68533300 | -2.01857400 |
| H | -0.11042700 | 4.11086300 | -0.68977100 |

**TS-3**

|    |             |             |             |
|----|-------------|-------------|-------------|
| N  | 1.00123100  | 0.09496600  | 1.08981000  |
| C  | 2.22814000  | -1.36981400 | 0.57875500  |
| C  | 1.84564200  | -1.94756700 | -0.60629600 |
| C  | 0.56107300  | 3.27618000  | -0.63932300 |
| C  | 1.80846000  | 2.62445200  | -0.61674400 |
| C  | 1.84597300  | 1.67967900  | -1.72820200 |
| C  | 0.63019300  | 1.84153000  | -2.49142500 |
| C  | -0.18738500 | 2.77143500  | -1.79226100 |
| Rh | 0.18987600  | 1.00226200  | -0.47278500 |
| C  | 1.05424500  | -1.08661300 | 1.60849900  |
| O  | 0.66027800  | -1.81894900 | 2.48894600  |
| C  | -1.54527400 | 3.25814500  | -2.18277500 |
| H  | -1.48356400 | 4.28166900  | -2.57242800 |
| H  | -1.99260200 | 2.61828500  | -2.94287800 |
| H  | -2.21122700 | 3.27132400  | -1.31499300 |
| C  | 0.02770400  | 4.28996700  | 0.32320100  |
| H  | -0.05596600 | 5.27540900  | -0.15066700 |
| H  | -0.96840500 | 4.00356400  | 0.67170200  |
| H  | 0.67108200  | 4.38848300  | 1.19919800  |
| C  | 2.89455800  | 2.76355500  | 0.40249100  |
| H  | 3.78376800  | 3.22588700  | -0.04118400 |
| H  | 2.57340900  | 3.37851000  | 1.24467100  |

|   |             |             |             |
|---|-------------|-------------|-------------|
| H | 3.18302000  | 1.78584100  | 0.79874300  |
| C | 3.03191400  | 0.86296400  | -2.13014700 |
| H | 3.58163500  | 1.34741700  | -2.94680300 |
| H | 3.71718200  | 0.73195100  | -1.29191400 |
| H | 2.73033600  | -0.13047400 | -2.47364000 |
| C | 0.30153800  | 1.14614700  | -3.77496000 |
| H | 0.60799000  | 1.75545800  | -4.63383800 |
| H | 0.82337300  | 0.18832700  | -3.83832300 |
| H | -0.77009800 | 0.95224000  | -3.83999500 |
| O | -0.94424000 | 0.82213100  | 2.44926400  |
| C | -1.85643400 | 1.08738400  | 1.66520200  |
| O | -1.71980600 | 1.19730300  | 0.37118700  |
| C | -3.27907500 | 1.39823600  | 2.18813100  |
| C | -3.51677200 | 0.62055500  | 3.49077500  |
| H | -2.73755800 | 0.83966800  | 4.22257700  |
| H | -4.49132900 | 0.88955200  | 3.91239300  |
| H | -3.51092900 | -0.45634200 | 3.30245300  |
| C | -3.31136200 | 2.91547400  | 2.46978800  |
| H | -3.15680000 | 3.48783400  | 1.54886100  |
| H | -4.28506600 | 3.19950700  | 2.88331900  |
| H | -2.53652300 | 3.19610000  | 3.18955800  |
| C | -4.35624200 | 1.03790400  | 1.15420800  |
| H | -4.24034400 | 1.62043600  | 0.23705200  |
| H | -4.31849000 | -0.02177200 | 0.89251200  |
| H | -5.34753300 | 1.25175400  | 1.56899900  |
| C | 0.55357100  | -1.90644800 | -1.23380600 |
| C | -0.31331600 | -0.83805000 | -1.16523500 |
| C | -1.72735000 | -1.01012900 | -1.69286600 |
| O | -2.35964300 | 0.21142100  | -2.06619500 |
| H | -2.45862900 | 0.70829900  | -1.23162400 |
| H | -1.68748800 | -1.58925500 | -2.62311300 |
| C | -2.62076800 | -1.77771200 | -0.71467200 |
| C | -2.27152000 | -2.01215100 | 0.61806400  |
| C | -3.87264100 | -2.20757300 | -1.17109300 |
| C | -3.15189200 | -2.67384200 | 1.47627800  |
| H | -1.31821100 | -1.68131000 | 1.00489700  |
| C | -4.75594300 | -2.86335600 | -0.31540500 |
| H | -4.15590000 | -2.01193100 | -2.20137800 |
| C | -4.39686200 | -3.10048900 | 1.01401000  |
| H | -2.85601900 | -2.84736300 | 2.50624200  |
| H | -5.72335700 | -3.19077700 | -0.68527500 |
| H | -5.08323700 | -3.61204100 | 1.68218600  |
| C | 3.60277600  | -1.22398900 | 1.07086700  |
| C | 3.85660500  | -0.96711000 | 2.43085200  |



|   |             |             |             |
|---|-------------|-------------|-------------|
| C | 4.69809800  | -1.32021700 | 0.19175500  |
| C | 5.16096900  | -0.80902300 | 2.89003700  |
| H | 3.02810000  | -0.90886500 | 3.12769100  |
| C | 6.00198400  | -1.17715500 | 0.65900400  |
| H | 4.52497200  | -1.49899400 | -0.86403100 |
| C | 6.23944900  | -0.91480100 | 2.00922700  |
| H | 5.33591700  | -0.61077200 | 3.94299800  |
| H | 6.83272300  | -1.25796400 | -0.03566200 |
| H | 7.25551200  | -0.79276300 | 2.37149500  |
| H | 2.58246300  | -2.59526400 | -1.07849400 |
| C | 0.19463000  | -3.11585900 | -2.06804300 |
| C | 0.80856800  | -4.47916600 | -1.83686500 |
| C | -0.63500700 | -4.24439800 | -1.49005800 |
| H | -0.02094500 | -2.88858200 | -3.11111700 |
| H | 1.50096300  | -4.60472900 | -1.01054300 |
| H | 1.04781100  | -5.07811100 | -2.71013100 |
| H | -1.41087100 | -4.67596000 | -2.11427600 |
| H | -0.89439400 | -4.17490400 | -0.44000000 |

#### INT-4

|    |             |             |             |
|----|-------------|-------------|-------------|
| N  | 1.12790100  | 0.24117100  | -1.05226100 |
| C  | 2.01741900  | 1.31630100  | -0.66257500 |
| C  | 1.50744100  | 2.24113400  | 0.18024300  |
| C  | 0.87877900  | -2.84714900 | 1.44708100  |
| C  | 2.03355400  | -2.06538000 | 1.29777300  |
| C  | 1.89199900  | -0.85731500 | 2.11426300  |
| C  | 0.64712500  | -0.95711700 | 2.82239400  |
| C  | -0.02490500 | -2.13599300 | 2.34991200  |
| Rh | 0.24394800  | -0.74094500 | 0.69019000  |
| C  | 0.53167500  | 0.16657400  | -2.12999700 |
| O  | -0.05183200 | 0.06894400  | -3.13449900 |
| C  | -1.33284500 | -2.66566900 | 2.84273100  |
| H  | -1.16823200 | -3.35026200 | 3.68473800  |
| H  | -1.98644200 | -1.85417200 | 3.16116200  |
| H  | -1.85096100 | -3.22225800 | 2.05848900  |
| C  | 0.59482700  | -4.16871500 | 0.80647400  |
| H  | 0.99061100  | -4.98769100 | 1.42038000  |
| H  | -0.47943300 | -4.32835800 | 0.69692300  |
| H  | 1.03242200  | -4.22949000 | -0.19031600 |
| C  | 3.20454100  | -2.37095900 | 0.42051800  |
| H  | 4.00488000  | -2.84601700 | 1.00150400  |
| H  | 2.92129700  | -3.04897100 | -0.38690800 |
| H  | 3.61569500  | -1.46428500 | -0.02821000 |
| C  | 2.96196200  | 0.15947400  | 2.36112100  |

|   |             |             |             |
|---|-------------|-------------|-------------|
| H | 3.56986000  | -0.12343300 | 3.22996300  |
| H | 3.62863200  | 0.25675100  | 1.50254900  |
| H | 2.52729500  | 1.14208500  | 2.55720500  |
| C | 0.14472900  | -0.01867100 | 3.87296500  |
| H | 0.48692600  | -0.34033700 | 4.86437200  |
| H | 0.51008800  | 0.99546400  | 3.69881000  |
| H | -0.94586100 | 0.00749900  | 3.87429100  |
| O | -0.19088800 | -2.55258000 | -1.75106200 |
| C | -1.29805800 | -2.19553300 | -1.33988900 |
| O | -1.47399400 | -1.27281800 | -0.42839600 |
| C | -2.60691900 | -2.79987000 | -1.88546900 |
| C | -3.43606500 | -1.67183000 | -2.52952700 |
| H | -2.87393800 | -1.18496500 | -3.33364200 |
| H | -4.35620900 | -2.08169000 | -2.96014100 |
| H | -3.70568500 | -0.91117600 | -1.79462500 |
| C | -2.28282000 | -3.87833500 | -2.92601000 |
| H | -1.68055900 | -4.67916500 | -2.48869600 |
| H | -3.20993800 | -4.31238100 | -3.31624200 |
| H | -1.71486400 | -3.45853000 | -3.75961600 |
| C | -3.39474200 | -3.41449600 | -0.71279300 |
| H | -2.82103400 | -4.21293100 | -0.22771100 |
| H | -3.63685900 | -2.65879100 | 0.03802100  |
| H | -4.33084300 | -3.85264100 | -1.07526000 |
| C | 0.15667500  | 2.25882300  | 0.72579300  |
| C | -0.57047700 | 1.12128500  | 0.93342200  |
| C | -2.02077700 | 1.21784400  | 1.39751500  |
| O | -2.58760600 | -0.04172600 | 1.75197400  |
| H | -2.45168600 | -0.62380700 | 0.97914000  |
| H | -2.05894200 | 1.80558800  | 2.32470800  |
| C | -2.90520600 | 1.92135700  | 0.37363600  |
| C | -3.85866400 | 2.85308400  | 0.79217900  |
| C | -2.80772500 | 1.62166000  | -0.99003800 |
| C | -4.69142700 | 3.48712700  | -0.13081200 |
| H | -3.94064300 | 3.09138900  | 1.84979700  |
| C | -3.64099000 | 2.24853700  | -1.91517600 |
| H | -2.08453900 | 0.88704700  | -1.32010900 |
| C | -4.58231400 | 3.18834100  | -1.48978800 |
| H | -5.42319600 | 4.21398800  | 0.21036200  |
| H | -3.55320200 | 2.00189900  | -2.96941400 |
| H | -5.22725100 | 3.68166500  | -2.21102800 |
| C | 3.39416600  | 1.22805600  | -1.16197300 |
| C | 3.76200500  | 0.25713500  | -2.11247100 |
| C | 4.39719000  | 2.10059800  | -0.69079000 |
| C | 5.07075200  | 0.17599600  | -2.58595800 |

|   |             |             |             |
|---|-------------|-------------|-------------|
| H | 3.02662600  | -0.45235800 | -2.47225200 |
| C | 5.69954900  | 2.01697600  | -1.16789400 |
| H | 4.15887900  | 2.84261600  | 0.06280200  |
| C | 6.04701200  | 1.05508400  | -2.12102900 |
| H | 5.32433600  | -0.58353200 | -3.31922600 |
| H | 6.45125400  | 2.70222400  | -0.78768000 |
| H | 7.06638400  | 0.98949000  | -2.48778800 |
| H | 2.15703600  | 3.06286300  | 0.45821500  |
| C | -0.41291100 | 3.61271800  | 1.06287400  |
| C | 0.25773800  | 4.92065100  | 0.69339800  |
| C | -0.99832400 | 4.50107100  | -0.01610100 |
| H | -0.96008400 | 3.64274000  | 2.00265000  |
| H | 1.18331700  | 4.90170400  | 0.12758200  |
| H | 0.20249700  | 5.73028500  | 1.41480800  |
| H | -1.93203800 | 5.01045300  | 0.19447700  |
| H | -0.90779100 | 4.14450300  | -1.03699300 |

#### TS-4

|    |             |             |             |
|----|-------------|-------------|-------------|
| N  | -0.87997900 | -0.62117400 | -1.31977200 |
| C  | -1.04069900 | -1.97169700 | -0.92352100 |
| C  | -0.05566400 | -2.60334500 | -0.23075100 |
| C  | -1.86166300 | 1.70385600  | 2.07500800  |
| C  | -2.63115700 | 0.58370100  | 1.68468200  |
| C  | -1.91875600 | -0.61765600 | 2.10927800  |
| C  | -0.71761300 | -0.21328400 | 2.76330500  |
| C  | -0.63349400 | 1.22609800  | 2.69562000  |
| Rh | -0.61286200 | 0.48363500  | 0.66544800  |
| C  | 0.32326800  | -0.16439400 | -1.53718000 |
| O  | 0.99937300  | 0.46274100  | -2.27508600 |
| C  | 0.42414300  | 2.08212800  | 3.31602600  |
| H  | 0.23102900  | 2.21947600  | 4.38783700  |
| H  | 1.41467000  | 1.64539500  | 3.18426200  |
| H  | 0.44970200  | 3.06650000  | 2.84614200  |
| C  | -2.21653300 | 3.14064700  | 1.87605500  |
| H  | -2.71217500 | 3.52934700  | 2.77433600  |
| H  | -1.32270800 | 3.74190500  | 1.70101200  |
| H  | -2.87966100 | 3.26782500  | 1.02112600  |
| C  | -3.93322300 | 0.62048700  | 0.95055200  |
| H  | -4.76797400 | 0.78665700  | 1.64278000  |
| H  | -3.92288400 | 1.42205200  | 0.20899800  |
| H  | -4.11543700 | -0.31818500 | 0.42321000  |
| C  | -2.45231300 | -2.01114700 | 2.05367200  |
| H  | -2.99978500 | -2.23470300 | 2.97792700  |
| H  | -3.13577900 | -2.15118500 | 1.21625200  |

|   |             |             |             |
|---|-------------|-------------|-------------|
| H | -1.64718200 | -2.74087900 | 1.95207600  |
| C | 0.25972900  | -1.11819500 | 3.44249500  |
| H | -0.07005900 | -1.32216900 | 4.46866500  |
| H | 0.35067000  | -2.07157700 | 2.91938300  |
| H | 1.24945300  | -0.66123700 | 3.49528800  |
| O | -2.02112400 | 2.47455800  | -1.23458500 |
| C | -0.85235600 | 2.83073400  | -1.09121900 |
| O | 0.02487600  | 2.19977500  | -0.34723000 |
| C | -0.28456500 | 4.10305000  | -1.75518300 |
| C | 0.95574800  | 3.73304200  | -2.58998700 |
| H | 0.70424500  | 3.00328100  | -3.36484900 |
| H | 1.35502700  | 4.62908200  | -3.07790100 |
| H | 1.73882100  | 3.29960900  | -1.96464000 |
| C | -1.35705300 | 4.73476300  | -2.65035000 |
| H | -2.25102300 | 4.98737200  | -2.07466200 |
| H | -0.96763200 | 5.64857500  | -3.11228300 |
| H | -1.65987500 | 4.04604600  | -3.44313700 |
| C | 0.12088700  | 5.08748900  | -0.63971100 |
| H | -0.74437600 | 5.37022000  | -0.02958400 |
| H | 0.87771100  | 4.64662700  | 0.01413600  |
| H | 0.53275900  | 6.00309400  | -1.07756500 |
| C | 1.16836000  | -1.93562900 | 0.18036100  |
| C | 1.23662400  | -0.55316300 | 0.28311400  |
| C | 2.50719500  | 0.16096900  | 0.74859200  |
| O | 2.38601800  | 1.57525600  | 0.78067200  |
| H | 1.65873900  | 1.86862900  | 0.19912500  |
| H | 2.63865500  | -0.14838000 | 1.80048700  |
| C | 3.80635500  | -0.21917000 | 0.04151500  |
| C | 4.89611700  | -0.65213600 | 0.80328700  |
| C | 3.95902700  | -0.10586800 | -1.34454700 |
| C | 6.10544700  | -0.99877800 | 0.19971400  |
| H | 4.79317600  | -0.72556500 | 1.88375100  |
| C | 5.16633400  | -0.44922200 | -1.95182500 |
| H | 3.13177800  | 0.24647300  | -1.94657500 |
| C | 6.24193900  | -0.90348800 | -1.18562000 |
| H | 6.93856500  | -1.33639800 | 0.80972100  |
| H | 5.26702000  | -0.36250700 | -3.03004000 |
| H | 7.17941400  | -1.17317200 | -1.66304300 |
| C | -2.33207700 | -2.55430600 | -1.31253800 |
| C | -3.32526400 | -1.72423900 | -1.86495400 |
| C | -2.62789400 | -3.91610000 | -1.11500200 |
| C | -4.57629600 | -2.24089200 | -2.19729200 |
| H | -3.09842700 | -0.67547800 | -2.01788600 |
| C | -3.87737700 | -4.42587900 | -1.44864700 |

|   |             |             |             |
|---|-------------|-------------|-------------|
| H | -1.87709100 | -4.58313100 | -0.70528300 |
| C | -4.86032900 | -3.59056400 | -1.98899100 |
| H | -5.33058200 | -1.58353400 | -2.61919400 |
| H | -4.08587000 | -5.47991600 | -1.29161200 |
| H | -5.83547800 | -3.99212600 | -2.24690500 |
| H | -0.16995500 | -3.64860700 | 0.01889100  |
| C | 2.34778400  | -2.79176200 | 0.50430400  |
| C | 2.39580400  | -4.29180400 | 0.29744300  |
| C | 3.17993500  | -3.39656700 | -0.61451600 |
| H | 2.94059500  | -2.42922800 | 1.33722200  |
| H | 1.53207200  | -4.80008500 | -0.11745200 |
| H | 2.93129200  | -4.86901200 | 1.04494600  |
| H | 4.25787000  | -3.32762600 | -0.51880100 |
| H | 2.80398600  | -3.25355500 | -1.62219700 |

**INT-5**

|    |             |             |             |
|----|-------------|-------------|-------------|
| N  | -0.13346200 | -0.70744900 | 0.48152000  |
| C  | -0.11708100 | -1.95889500 | -0.05915200 |
| C  | 0.99906900  | -2.76330000 | 0.03839000  |
| C  | -3.09868400 | 2.32298300  | 0.58367100  |
| C  | -3.73945000 | 1.10112500  | 0.18891800  |
| C  | -3.39868400 | 0.06948700  | 1.14098500  |
| C  | -2.53836900 | 0.66438500  | 2.13977200  |
| C  | -2.35084800 | 2.04465100  | 1.79754100  |
| Rh | -1.58582600 | 0.81371300  | 0.20046000  |
| C  | 0.92906600  | -0.27390900 | 1.25716900  |
| O  | 0.81115700  | 0.80350900  | 1.91313800  |
| C  | -1.47299200 | 2.99764900  | 2.53992500  |
| H  | -1.90339100 | 3.22434000  | 3.52226300  |
| H  | -0.48827500 | 2.54327800  | 2.67601400  |
| H  | -1.35005500 | 3.93278200  | 1.99189400  |
| C  | -3.17940100 | 3.64876500  | -0.10561200 |
| H  | -3.89716400 | 4.30827300  | 0.39658400  |
| H  | -2.20566200 | 4.14368600  | -0.10738900 |
| H  | -3.49691000 | 3.53444600  | -1.14404600 |
| C  | -4.57571900 | 0.89470000  | -1.03214800 |
| H  | -5.63492300 | 1.05873000  | -0.80034000 |
| H  | -4.28738300 | 1.58422300  | -1.82767200 |
| H  | -4.46106200 | -0.12334100 | -1.40939200 |
| C  | -3.95487000 | -1.31621900 | 1.17248800  |
| H  | -4.89304600 | -1.32740300 | 1.74203200  |
| H  | -4.15880600 | -1.69538800 | 0.17079800  |
| H  | -3.26241500 | -2.00966000 | 1.64910400  |
| C  | -1.94601000 | -0.02313700 | 3.32689300  |

|   |             |             |             |
|---|-------------|-------------|-------------|
| H | -2.54475200 | 0.18038000  | 4.22291600  |
| H | -1.91493900 | -1.10348800 | 3.17586800  |
| H | -0.92441300 | 0.32371700  | 3.48737600  |
| O | -1.07948500 | 0.79753300  | -1.93151900 |
| C | -0.05137200 | 1.52776700  | -1.70960500 |
| O | 0.05984400  | 2.03451400  | -0.55134400 |
| C | 1.05648100  | 1.66349600  | -2.73864800 |
| C | 2.07100500  | 0.54622200  | -2.38996600 |
| H | 1.60482600  | -0.44186300 | -2.45548700 |
| H | 2.91045200  | 0.58215600  | -3.09081400 |
| H | 2.46564600  | 0.67645100  | -1.38155700 |
| C | 0.50400200  | 1.45675100  | -4.15596800 |
| H | -0.23351400 | 2.22466700  | -4.41165200 |
| H | 1.32128600  | 1.51580200  | -4.88188900 |
| H | 0.02349500  | 0.48059100  | -4.25327500 |
| C | 1.72926900  | 3.03805000  | -2.60372400 |
| H | 1.02955800  | 3.84569400  | -2.84480000 |
| H | 2.09918000  | 3.18711500  | -1.58882700 |
| H | 2.57695700  | 3.10333400  | -3.29325900 |
| C | 2.17328200  | -2.30613300 | 0.68751800  |
| C | 2.14299300  | -1.06343900 | 1.29720800  |
| C | 3.34825400  | -0.40459200 | 1.97178600  |
| O | 3.00933400  | 0.22647000  | 3.18765000  |
| H | 2.15121900  | 0.66300700  | 2.98861900  |
| H | 4.08357200  | -1.17226300 | 2.22813800  |
| C | 4.01110300  | 0.53995100  | 0.96381800  |
| C | 4.85450000  | 0.02746300  | -0.02975000 |
| C | 3.75779000  | 1.91401200  | 0.99155500  |
| C | 5.43293600  | 0.86922900  | -0.97894600 |
| H | 5.05245800  | -1.03992800 | -0.06637600 |
| C | 4.33326800  | 2.75764100  | 0.04014300  |
| H | 3.10820100  | 2.31204200  | 1.76068200  |
| C | 5.17121800  | 2.24020700  | -0.94895900 |
| H | 6.08780400  | 0.45543400  | -1.74086000 |
| H | 4.12714900  | 3.82388900  | 0.07322400  |
| H | 5.61873200  | 2.89921900  | -1.68730400 |
| C | -1.35011700 | -2.54518300 | -0.66049900 |
| C | -2.00849800 | -2.00647200 | -1.77421600 |
| C | -1.84644900 | -3.73213800 | -0.09618900 |
| C | -3.14586900 | -2.62991100 | -2.29061500 |
| H | -1.62360100 | -1.10890000 | -2.23762300 |
| C | -2.98415500 | -4.35238400 | -0.61209200 |
| H | -1.33606600 | -4.15753500 | 0.76249800  |
| C | -3.64331000 | -3.79898800 | -1.71064700 |

|   |             |             |             |
|---|-------------|-------------|-------------|
| H | -3.63642800 | -2.20434800 | -3.16181800 |
| H | -3.35573500 | -5.26418000 | -0.15378200 |
| H | -4.52853500 | -4.27935400 | -2.11690300 |
| H | 0.95715800  | -3.74678400 | -0.41081600 |
| C | 3.39202600  | -3.16452300 | 0.67436000  |
| C | 3.31988000  | -4.66304900 | 0.46699700  |
| C | 3.85894900  | -3.79336200 | -0.62987900 |
| H | 4.18857500  | -2.84352500 | 1.33330900  |
| H | 2.34476300  | -5.12016400 | 0.33633300  |
| H | 4.01897800  | -5.26949400 | 1.03417500  |
| H | 4.92478600  | -3.80794600 | -0.83607700 |
| H | 3.23259800  | -3.62223400 | -1.49974100 |

**TS-5**

|    |             |             |             |
|----|-------------|-------------|-------------|
| N  | 0.18037300  | 0.54316100  | 1.04284400  |
| C  | 0.38006300  | 1.91436900  | 0.96899200  |
| C  | 1.51935000  | 2.42606600  | 0.40375000  |
| C  | -2.85472800 | -0.03450000 | -2.22286400 |
| C  | -2.41751000 | 1.34750400  | -2.05937200 |
| C  | -1.03525600 | 1.40838500  | -2.36999700 |
| C  | -0.57201300 | 0.06110500  | -2.67328000 |
| C  | -1.71503400 | -0.80510600 | -2.65155700 |
| Rh | -1.41034900 | -0.03255400 | -0.65383900 |
| C  | 1.28089300  | -0.29596300 | 0.78184500  |
| O  | 1.32556900  | -1.42704400 | 1.29187800  |
| C  | -1.70886300 | -2.26126200 | -2.97834300 |
| H  | -1.87333900 | -2.39573400 | -4.05464800 |
| H  | -0.74978000 | -2.71213300 | -2.71812500 |
| H  | -2.49617600 | -2.78370900 | -2.43438800 |
| C  | -4.25322300 | -0.53255400 | -2.06666200 |
| H  | -4.74291000 | -0.59724300 | -3.04633400 |
| H  | -4.24917300 | -1.51281800 | -1.58794800 |
| H  | -4.83393100 | 0.14246900  | -1.43574700 |
| C  | -3.31105300 | 2.46651700  | -1.63078700 |
| H  | -4.01865000 | 2.72246900  | -2.42783600 |
| H  | -3.88322700 | 2.17059300  | -0.74756200 |
| H  | -2.74103200 | 3.35753600  | -1.36714700 |
| C  | -0.18419900 | 2.62672100  | -2.46940000 |
| H  | 0.24347400  | 2.69108400  | -3.47601000 |
| H  | -0.76215000 | 3.53314200  | -2.28599200 |
| H  | 0.64485600  | 2.59417000  | -1.75925200 |
| C  | 0.80368900  | -0.31995200 | -3.11916600 |
| H  | 0.80619000  | -0.53302200 | -4.19546700 |
| H  | 1.50992900  | 0.49018300  | -2.93166100 |

|   |             |             |             |
|---|-------------|-------------|-------------|
| H | 1.16746700  | -1.20386300 | -2.58742600 |
| O | -3.18712200 | -2.65089700 | 0.03737000  |
| C | -1.98131200 | -2.80859000 | 0.25453600  |
| O | -1.05056200 | -1.91989500 | 0.04980700  |
| C | -1.42119000 | -4.13174300 | 0.82282900  |
| C | -0.84600000 | -3.84518400 | 2.22425500  |
| H | -1.62411800 | -3.46515700 | 2.89466100  |
| H | -0.44915900 | -4.77079100 | 2.65717600  |
| H | -0.05069500 | -3.10103700 | 2.17001100  |
| C | -2.54589800 | -5.17013600 | 0.90968300  |
| H | -2.97595900 | -5.37446700 | -0.07510100 |
| H | -2.15456100 | -6.10809600 | 1.31881400  |
| H | -3.35479800 | -4.81909400 | 1.55491900  |
| C | -0.30045300 | -4.64012800 | -0.10266300 |
| H | -0.68439700 | -4.85543100 | -1.10677500 |
| H | 0.49566800  | -3.89993000 | -0.19162800 |
| H | 0.12576000  | -5.56700000 | 0.29635800  |
| C | 2.49213400  | 1.56764700  | -0.20429400 |
| C | 2.33216200  | 0.20617400  | -0.09107100 |
| C | 3.26799700  | -0.82081200 | -0.72344500 |
| O | 2.60521000  | -2.05893800 | -0.95281400 |
| H | 2.13988100  | -2.25697100 | -0.11419100 |
| H | 3.53377200  | -0.45858500 | -1.72257300 |
| C | 4.56599500  | -0.99454700 | 0.05566600  |
| C | 5.79458400  | -0.85390900 | -0.59587400 |
| C | 4.55387100  | -1.30429300 | 1.42232000  |
| C | 6.99543500  | -1.01032000 | 0.09882200  |
| H | 5.81123300  | -0.62617700 | -1.65953100 |
| C | 5.75122700  | -1.46641700 | 2.11606300  |
| H | 3.60211800  | -1.42559600 | 1.92893500  |
| C | 6.97549700  | -1.31620600 | 1.45896500  |
| H | 7.94187100  | -0.89710900 | -0.42222000 |
| H | 5.73027400  | -1.70867400 | 3.17473600  |
| H | 7.90663700  | -1.43921800 | 2.00431800  |
| C | -0.65867100 | 2.81679300  | 1.52189600  |
| C | -1.26166900 | 2.56982700  | 2.76412400  |
| C | -1.02016600 | 3.97925800  | 0.82283700  |
| C | -2.22317000 | 3.44136700  | 3.27106800  |
| H | -0.97516000 | 1.69674200  | 3.33600300  |
| C | -1.98038200 | 4.85178000  | 1.33082000  |
| H | -0.54995900 | 4.19092100  | -0.13043800 |
| C | -2.59315700 | 4.58101300  | 2.55482300  |
| H | -2.67780900 | 3.23307200  | 4.23493200  |
| H | -2.25159400 | 5.74109300  | 0.76933000  |



|   |             |             |             |
|---|-------------|-------------|-------------|
| H | -3.34460700 | 5.25679100  | 2.95156400  |
| H | 1.66865600  | 3.49839700  | 0.42183500  |
| C | 3.65536200  | 2.15878400  | -0.91608500 |
| C | 3.55024600  | 3.48477600  | -1.65189600 |
| C | 4.33864000  | 3.40451200  | -0.38058400 |
| H | 4.33184000  | 1.43853100  | -1.35633700 |
| H | 2.59560000  | 4.00054200  | -1.62969000 |
| H | 4.08406600  | 3.57550600  | -2.59259700 |
| H | 5.42190900  | 3.43257900  | -0.43364800 |
| H | 3.92256900  | 3.85719300  | 0.51365200  |
| O | -1.53771700 | -0.45139800 | 2.57954100  |
| C | -2.67941100 | -0.24141900 | 2.04396300  |
| O | -2.83778600 | 0.26154700  | 0.89523000  |
| C | -3.90479900 | -0.65170300 | 2.80977400  |
| H | -4.22353800 | -1.61381700 | 2.39438300  |
| H | -3.68732500 | -0.76383100 | 3.87212300  |
| H | -4.70910800 | 0.06826900  | 2.64739700  |
| H | -0.69217700 | -0.01311100 | 1.88573000  |

**INT-ii**

|    |             |             |             |
|----|-------------|-------------|-------------|
| N  | -0.50707300 | -0.94984400 | 1.21180700  |
| C  | -2.31356300 | 0.36284300  | 0.50913800  |
| C  | -1.82257100 | 0.02698500  | -0.69612800 |
| C  | -0.01387800 | -3.44451700 | -0.75459000 |
| C  | -1.30432400 | -2.99661000 | -1.23977800 |
| C  | -1.08979000 | -2.31519300 | -2.49681100 |
| C  | 0.31708900  | -2.25274000 | -2.71820300 |
| C  | 0.98054000  | -2.98949700 | -1.65496900 |
| Rh | -0.17980600 | -1.15885900 | -0.79483300 |
| C  | -1.49898600 | -0.11551000 | 1.67571100  |
| O  | -1.67081900 | 0.18178800  | 2.85654500  |
| C  | 2.44982200  | -3.27115300 | -1.59434000 |
| H  | 2.70034900  | -4.14353900 | -2.21062000 |
| H  | 3.03448500  | -2.42541400 | -1.96135800 |
| H  | 2.77702600  | -3.48212500 | -0.57371500 |
| C  | 0.18498500  | -4.21544500 | 0.51299600  |
| H  | -0.20815500 | -5.23396000 | 0.41292600  |
| H  | 1.24162600  | -4.28506600 | 0.77836800  |
| H  | -0.33617200 | -3.72631200 | 1.33990300  |
| C  | -2.61525200 | -3.32125300 | -0.59401700 |
| H  | -2.89481600 | -4.36717100 | -0.76922200 |
| H  | -2.55552600 | -3.15848600 | 0.48512400  |
| H  | -3.41503700 | -2.68567000 | -0.97748800 |
| C  | -2.14937200 | -1.76882900 | -3.40055200 |

|   |             |             |             |
|---|-------------|-------------|-------------|
| H | -2.40035700 | -2.49308000 | -4.18428200 |
| H | -3.06447500 | -1.54617100 | -2.84763000 |
| H | -1.81880400 | -0.84569600 | -3.88347300 |
| C | 1.01189200  | -1.62510500 | -3.88564000 |
| H | 1.27895400  | -2.37533500 | -4.63958700 |
| H | 0.37773700  | -0.87464000 | -4.36162500 |
| H | 1.93573600  | -1.13472100 | -3.56463900 |
| O | 0.48426600  | -1.23577500 | 2.18080100  |
| C | 1.12979100  | -0.14390800 | 2.70869200  |
| O | 1.08189200  | 0.96831300  | 2.24319400  |
| C | 1.88857300  | -0.55154300 | 3.97083400  |
| C | 2.72192300  | 0.64463600  | 4.44759400  |
| H | 2.08394700  | 1.50828800  | 4.64672400  |
| H | 3.25584000  | 0.38148500  | 5.36616800  |
| H | 3.45553700  | 0.94238600  | 3.69314500  |
| C | 0.83561900  | -0.92766900 | 5.03662600  |
| H | 0.26015900  | -1.80094300 | 4.72312800  |
| H | 1.33632200  | -1.15249300 | 5.98447900  |
| H | 0.13175100  | -0.10667700 | 5.19313900  |
| C | 2.80113600  | -1.75907400 | 3.68236300  |
| H | 2.22354500  | -2.61781400 | 3.33347400  |
| H | 3.55310300  | -1.51488400 | 2.92405300  |
| H | 3.33067600  | -2.04711200 | 4.59632600  |
| C | 1.61768000  | 0.04138900  | -0.58135400 |
| C | 0.78631800  | 0.74290800  | -1.20038200 |
| C | 0.27274800  | 1.96946900  | -1.84844200 |
| O | 0.09235700  | 1.77351300  | -3.25378800 |
| H | 0.92998200  | 1.42921200  | -3.59416400 |
| H | -0.73180800 | 2.17575600  | -1.46736100 |
| C | 1.17839100  | 3.14882600  | -1.50551600 |
| C | 1.66487100  | 3.99561500  | -2.50177200 |
| C | 1.50023900  | 3.39699700  | -0.16327300 |
| C | 2.48564500  | 5.07560400  | -2.16612400 |
| H | 1.38596600  | 3.81537900  | -3.53419600 |
| C | 2.31251500  | 4.48054100  | 0.16683000  |
| H | 1.12874200  | 2.73656700  | 0.61502000  |
| C | 2.81287600  | 5.31944200  | -0.83321500 |
| H | 2.86296500  | 5.72804400  | -2.94831100 |
| H | 2.55624000  | 4.66735100  | 1.20853600  |
| H | 3.44881400  | 6.16017300  | -0.57230500 |
| C | -3.53572300 | 1.16747600  | 0.72216000  |
| C | -4.33177700 | 0.99142800  | 1.86679500  |
| C | -3.94182800 | 2.11433400  | -0.23392900 |
| C | -5.50525800 | 1.72501900  | 2.03214800  |

|   |             |             |             |
|---|-------------|-------------|-------------|
| H | -4.00921200 | 0.29238400  | 2.62746400  |
| C | -5.11637300 | 2.84324800  | -0.06761400 |
| H | -3.32101800 | 2.28988500  | -1.10758200 |
| C | -5.90675800 | 2.64960600  | 1.06702500  |
| H | -6.10818200 | 1.57406900  | 2.92316500  |
| H | -5.40806200 | 3.57259800  | -0.81805900 |
| H | -6.81985200 | 3.22202700  | 1.20195200  |
| H | -2.29639700 | 0.32549700  | -1.62937400 |
| C | 2.87254500  | -0.34998700 | 0.02671900  |
| C | 4.17254600  | -0.05942700 | -0.71377200 |
| C | 3.82793800  | 0.72204200  | 0.51697000  |
| H | 2.84031500  | -1.26660200 | 0.60439900  |
| H | 4.08776600  | 0.44487400  | -1.67110600 |
| H | 4.95274700  | -0.81265100 | -0.66023900 |
| H | 4.36552100  | 0.50874200  | 1.43503300  |
| H | 3.50985400  | 1.75100500  | 0.40156900  |

**TS-1i**

|    |             |             |             |
|----|-------------|-------------|-------------|
| N  | 0.85799000  | -0.79082100 | 1.15197100  |
| C  | -1.24083900 | -1.70142600 | 0.72695100  |
| C  | -0.98312800 | -1.28333500 | -0.54469000 |
| C  | 3.10293300  | -1.19693500 | -1.14377900 |
| C  | 2.27906000  | -2.37135300 | -1.39563800 |
| C  | 1.47939500  | -2.09504500 | -2.54038000 |
| C  | 1.78014200  | -0.75409400 | -2.99187000 |
| C  | 2.82467800  | -0.22554600 | -2.15165300 |
| Rh | 0.96964200  | -0.62993500 | -0.90981000 |
| C  | -0.28861300 | -1.21106700 | 1.77403800  |
| O  | -0.49114800 | -1.19882600 | 2.98923700  |
| C  | 3.49800500  | 1.10148900  | -2.31924700 |
| H  | 4.31855500  | 1.03393800  | -3.04400300 |
| H  | 2.79963300  | 1.86254500  | -2.67505400 |
| H  | 3.91893700  | 1.45443200  | -1.37496800 |
| C  | 4.11771100  | -1.09351100 | -0.04835100 |
| H  | 5.03118800  | -1.63703200 | -0.31974900 |
| H  | 4.38789600  | -0.05462400 | 0.14963100  |
| H  | 3.72973600  | -1.51490800 | 0.88057100  |
| C  | 2.30099600  | -3.62312600 | -0.57535400 |
| H  | 3.19967900  | -4.21774600 | -0.77969600 |
| H  | 2.28652500  | -3.38245200 | 0.49110000  |
| H  | 1.42976400  | -4.24736500 | -0.78414000 |
| C  | 0.47547000  | -3.00825000 | -3.17242400 |
| H  | 0.93066300  | -3.58307200 | -3.98769300 |
| H  | 0.06952700  | -3.71657000 | -2.44693000 |

|   |             |             |             |
|---|-------------|-------------|-------------|
| H | -0.36033100 | -2.44300400 | -3.59301800 |
| C | 1.20404300  | -0.08920600 | -4.20434800 |
| H | 1.71913300  | -0.41565200 | -5.11633100 |
| H | 0.14111100  | -0.31509900 | -4.31563700 |
| H | 1.31128900  | 0.99730600  | -4.14085200 |
| O | 1.74610400  | -0.09655200 | 2.00563800  |
| C | 1.25350900  | 1.04565900  | 2.58396000  |
| O | 0.19278900  | 1.54940000  | 2.30870000  |
| C | 2.24904000  | 1.56885100  | 3.61967300  |
| C | 1.73053400  | 2.90860500  | 4.15697700  |
| H | 0.74237800  | 2.79205600  | 4.60724300  |
| H | 2.41957200  | 3.29651700  | 4.91403100  |
| H | 1.64343900  | 3.64742600  | 3.35509600  |
| C | 2.33669700  | 0.53087100  | 4.75823600  |
| H | 2.73357300  | -0.41777200 | 4.39069200  |
| H | 2.99230200  | 0.90562000  | 5.55161700  |
| H | 1.34782200  | 0.33700100  | 5.18233700  |
| C | 3.63105200  | 1.75710500  | 2.96363000  |
| H | 4.02266800  | 0.80976100  | 2.58764300  |
| H | 3.57673600  | 2.46467100  | 2.12823200  |
| H | 4.33809700  | 2.15848700  | 3.69708500  |
| C | 0.17805200  | 1.24971200  | -0.61944000 |
| C | -0.89922800 | 0.60479400  | -0.92442300 |
| C | -2.15559500 | 0.87802600  | -1.70497600 |
| O | -1.88400000 | 0.97377100  | -3.10491500 |
| H | -1.10011000 | 1.53344400  | -3.19490500 |
| H | -2.85580800 | 0.04305800  | -1.62207900 |
| C | -2.82102700 | 2.12073500  | -1.12300400 |
| C | -3.19404300 | 3.18834700  | -1.94022600 |
| C | -3.06966800 | 2.18231800  | 0.25519700  |
| C | -3.79491800 | 4.32053900  | -1.38415400 |
| H | -3.02006800 | 3.12197600  | -3.00859400 |
| C | -3.68014900 | 3.30725300  | 0.80503500  |
| H | -2.75793700 | 1.36349100  | 0.89636000  |
| C | -4.03804500 | 4.38310000  | -0.01275500 |
| H | -4.07558400 | 5.15065900  | -2.02579500 |
| H | -3.86265100 | 3.34905600  | 1.87435200  |
| H | -4.50503200 | 5.26334000  | 0.41869900  |
| C | -2.36373500 | -2.58070100 | 1.08263600  |
| C | -2.31568800 | -3.38450800 | 2.23822200  |
| C | -3.51090700 | -2.65701500 | 0.26922900  |
| C | -3.36505400 | -4.24684000 | 2.54584600  |
| H | -1.45849800 | -3.30652800 | 2.89397500  |
| C | -4.55632600 | -3.52086100 | 0.57965500  |

|   |             |             |             |
|---|-------------|-------------|-------------|
| H | -3.59220900 | -2.01821900 | -0.60476300 |
| C | -4.48736500 | -4.32494200 | 1.71959000  |
| H | -3.30626900 | -4.86008000 | 3.44050400  |
| H | -5.43233700 | -3.55723900 | -0.06163700 |
| H | -5.30507300 | -4.99562200 | 1.96632500  |
| H | -1.56246700 | -1.67012800 | -1.37810500 |
| C | 0.85945200  | 2.52253100  | -0.46155900 |
| C | 0.51463300  | 3.70845900  | -1.36674400 |
| C | 0.14554900  | 3.74061600  | 0.08355000  |
| H | 1.90715400  | 2.43700200  | -0.19096600 |
| H | -0.29355800 | 3.57322900  | -2.07845300 |
| H | 1.34008800  | 4.31907400  | -1.72100400 |
| H | 0.71742200  | 4.37269700  | 0.75469100  |
| H | -0.89649300 | 3.61932400  | 0.34813400  |

**INT-2i**

|    |             |             |             |
|----|-------------|-------------|-------------|
| N  | 0.33259200  | 1.18378400  | 0.84170600  |
| C  | 1.10756000  | -0.85422800 | 1.40003700  |
| C  | 0.59373200  | -1.78386300 | 0.49603300  |
| C  | 2.64310800  | 1.57127800  | -1.52284400 |
| C  | 3.36382600  | 0.39202400  | -1.25832100 |
| C  | 2.74948200  | -0.67987100 | -2.03225000 |
| C  | 1.71966800  | -0.12311900 | -2.85197600 |
| C  | 1.58831900  | 1.26573000  | -2.48534200 |
| Rh | 1.09802600  | 0.06991700  | -0.72312100 |
| C  | 0.24721700  | 0.33050400  | 1.88215100  |
| O  | -0.27594300 | 0.41509200  | 2.98301900  |
| C  | 0.71825400  | 2.30062800  | -3.12999500 |
| H  | 1.30114000  | 2.92998900  | -3.81450900 |
| H  | -0.08617900 | 1.84547000  | -3.71121200 |
| H  | 0.26459700  | 2.95265800  | -2.37913000 |
| C  | 2.84906100  | 2.92385200  | -0.91575300 |
| H  | 3.21733100  | 3.63420200  | -1.66565100 |
| H  | 1.90937700  | 3.31340000  | -0.51369500 |
| H  | 3.57259100  | 2.88859800  | -0.09927200 |
| C  | 4.54775000  | 0.22850300  | -0.35966500 |
| H  | 5.47835500  | 0.22999000  | -0.94109300 |
| H  | 4.60739900  | 1.03303500  | 0.37457900  |
| H  | 4.50541000  | -0.71147800 | 0.19492400  |
| C  | 3.23353200  | -2.09740400 | -2.04484800 |
| H  | 4.11067200  | -2.20457100 | -2.69515500 |
| H  | 3.52716000  | -2.41660000 | -1.04126200 |
| H  | 2.46250100  | -2.78080700 | -2.40743400 |
| C  | 0.94027400  | -0.85257500 | -3.90231800 |

|   |             |             |             |
|---|-------------|-------------|-------------|
| H | 1.47794100  | -0.84659700 | -4.85824600 |
| H | 0.77473000  | -1.89387900 | -3.61576400 |
| H | -0.03866400 | -0.39877300 | -4.06385300 |
| O | -0.40958700 | 2.38737000  | 0.84285900  |
| C | -1.77132000 | 2.27589100  | 0.95861400  |
| O | -2.35679000 | 1.23342700  | 1.09669100  |
| C | -2.41904900 | 3.65862300  | 0.85546000  |
| C | -3.93119500 | 3.49466000  | 1.05628700  |
| H | -4.15101400 | 3.06943300  | 2.03867300  |
| H | -4.42336300 | 4.46936700  | 0.97888600  |
| H | -4.35763400 | 2.82508400  | 0.30542800  |
| C | -1.83168900 | 4.58995500  | 1.93349200  |
| H | -0.75625100 | 4.72362600  | 1.79789000  |
| H | -2.31546600 | 5.57083000  | 1.87742800  |
| H | -2.00070800 | 4.18308700  | 2.93507200  |
| C | -2.12807700 | 4.22382000  | -0.55088900 |
| H | -1.05577400 | 4.37104600  | -0.70209100 |
| H | -2.49714100 | 3.54665400  | -1.32856800 |
| H | -2.63021900 | 5.18881700  | -0.67503800 |
| C | -0.80675300 | -0.68311100 | -0.93286800 |
| C | -0.76548500 | -1.75046100 | -0.11643400 |
| C | -1.68754700 | -2.93582800 | 0.08643400  |
| O | -1.64439100 | -3.81323700 | -1.05245300 |
| H | -1.63746100 | -3.24381800 | -1.83283600 |
| H | -1.26175600 | -3.53374300 | 0.90304400  |
| C | -3.10552600 | -2.56050600 | 0.49287100  |
| C | -4.21266500 | -3.15323900 | -0.11774400 |
| C | -3.30149800 | -1.62779700 | 1.51947100  |
| C | -5.50589200 | -2.79236000 | 0.26612500  |
| H | -4.04866800 | -3.89236900 | -0.89399100 |
| C | -4.59252200 | -1.27415300 | 1.90556200  |
| H | -2.45089400 | -1.14171400 | 1.98491100  |
| C | -5.69924300 | -1.84989100 | 1.27609700  |
| H | -6.36081400 | -3.24957100 | -0.22420700 |
| H | -4.73005200 | -0.53218700 | 2.68593100  |
| H | -6.70500300 | -1.56527800 | 1.57173000  |
| C | 2.42871700  | -1.01493400 | 2.05221300  |
| C | 2.99331000  | 0.07117600  | 2.74298400  |
| C | 3.15357200  | -2.21802800 | 2.00247900  |
| C | 4.24503000  | -0.03602000 | 3.34325300  |
| H | 2.44323500  | 1.00333900  | 2.80263800  |
| C | 4.40720000  | -2.32368900 | 2.60205700  |
| H | 2.73267900  | -3.08764900 | 1.50992600  |
| C | 4.96195400  | -1.23158300 | 3.27181100  |

|   |             |             |             |
|---|-------------|-------------|-------------|
| H | 4.66040100  | 0.81699800  | 3.87142400  |
| H | 4.94598200  | -3.26534400 | 2.55456000  |
| H | 5.93654900  | -1.31584500 | 3.74252600  |
| H | 1.19974300  | -2.66246300 | 0.27700200  |
| C | -1.78073100 | -0.10333200 | -1.87561000 |
| C | -2.89867500 | -0.88329300 | -2.56502600 |
| C | -3.24264100 | 0.15716000  | -1.54744600 |
| H | -1.34908600 | 0.66797900  | -2.50153100 |
| H | -3.06314000 | -1.91389000 | -2.27208900 |
| H | -3.06922700 | -0.68047300 | -3.61873100 |
| H | -3.65313600 | 1.10382400  | -1.88688900 |
| H | -3.59810100 | -0.17147000 | -0.58137800 |

**INT-4i**

|    |             |             |             |
|----|-------------|-------------|-------------|
| N  | -1.39205600 | 1.07071100  | -0.65905800 |
| C  | -2.70464100 | -0.76666500 | -0.88178900 |
| C  | -1.97010000 | -1.79187400 | -0.39125700 |
| C  | 0.96832400  | 2.14007900  | 2.27464500  |
| C  | -0.36881000 | 2.63649700  | 2.13042400  |
| C  | -1.24977300 | 1.52758100  | 2.25600700  |
| C  | -0.46086700 | 0.33656700  | 2.51887800  |
| C  | 0.92567900  | 0.73293200  | 2.55589700  |
| Rh | 0.06947000  | 0.89467800  | 0.46134400  |
| C  | -1.96207400 | 0.32683900  | -1.62135500 |
| O  | -2.01995200 | 0.54402800  | -2.82672900 |
| C  | 2.09498400  | -0.09159900 | 2.99503400  |
| H  | 2.26955700  | 0.03963000  | 4.07045900  |
| H  | 1.94729700  | -1.15521800 | 2.80902200  |
| H  | 3.00929400  | 0.20906200  | 2.47724500  |
| C  | 2.21380300  | 2.96298600  | 2.20771100  |
| H  | 2.56211300  | 3.20160000  | 3.22034000  |
| H  | 3.01533400  | 2.41746100  | 1.70272100  |
| H  | 2.04044700  | 3.89022300  | 1.66322300  |
| C  | -0.75506800 | 4.05183200  | 1.84702600  |
| H  | -0.48332000 | 4.70625100  | 2.68364600  |
| H  | -0.24253000 | 4.40362300  | 0.94835400  |
| H  | -1.83136600 | 4.13775700  | 1.68618200  |
| C  | -2.73867000 | 1.57895200  | 2.13266300  |
| H  | -3.16661100 | 2.19105500  | 2.93387600  |
| H  | -3.02874000 | 2.01456600  | 1.17225000  |
| H  | -3.18028200 | 0.58332500  | 2.18738600  |
| C  | -1.02926600 | -0.99214900 | 2.90300300  |
| H  | -1.56173300 | -0.91199600 | 3.85805600  |
| H  | -1.73578200 | -1.35440600 | 2.15106900  |

|   |             |             |             |
|---|-------------|-------------|-------------|
| H | -0.24463300 | -1.74040500 | 3.01418300  |
| O | 1.08389000  | 3.55969300  | -0.69647600 |
| C | 1.80290100  | 2.65030400  | -1.09340800 |
| O | 1.67891800  | 1.38746800  | -0.73173000 |
| C | 2.95349500  | 2.87739200  | -2.09602900 |
| C | 2.48740300  | 2.33773700  | -3.46583300 |
| H | 1.56832700  | 2.83516000  | -3.78948700 |
| H | 3.26084900  | 2.52233000  | -4.21876400 |
| H | 2.29634800  | 1.26160800  | -3.43659400 |
| C | 3.23731300  | 4.38158000  | -2.19995000 |
| H | 3.55469100  | 4.78981200  | -1.23568900 |
| H | 4.03547400  | 4.55960600  | -2.92816800 |
| H | 2.34545100  | 4.92744600  | -2.51361300 |
| C | 4.21931700  | 2.12898800  | -1.63781300 |
| H | 4.54611700  | 2.47579800  | -0.65088800 |
| H | 4.05604000  | 1.05079900  | -1.58380500 |
| H | 5.03542200  | 2.31757600  | -2.34324300 |
| C | -0.51448500 | -1.96860100 | -0.47626600 |
| C | 0.42961000  | -1.05469800 | -0.15424500 |
| C | 1.93467300  | -1.30070600 | -0.27684500 |
| O | 2.37200400  | -1.04591100 | -1.61118900 |
| H | 2.19964000  | -0.09340700 | -1.71537400 |
| H | 2.42869800  | -0.56911600 | 0.37490100  |
| C | 2.45868000  | -2.64945600 | 0.18875000  |
| C | 1.91311100  | -3.30635200 | 1.29740900  |
| C | 3.58417000  | -3.20149100 | -0.43137400 |
| C | 2.47254000  | -4.49078100 | 1.77495900  |
| H | 1.01812200  | -2.90883600 | 1.76305700  |
| C | 4.14263500  | -4.38931900 | 0.04215200  |
| H | 4.00385500  | -2.69523400 | -1.29217600 |
| C | 3.59200000  | -5.03905100 | 1.14760600  |
| H | 2.02722200  | -4.98983400 | 2.63106500  |
| H | 5.01202700  | -4.80839400 | -0.45651600 |
| H | 4.02763600  | -5.96368000 | 1.51415200  |
| C | -4.16602200 | -0.64806500 | -0.74755300 |
| C | -4.92380100 | 0.02463200  | -1.72191400 |
| C | -4.82882400 | -1.18943200 | 0.36842100  |
| C | -6.30546900 | 0.13757500  | -1.58492500 |
| H | -4.41729800 | 0.43827200  | -2.58667900 |
| C | -6.21043200 | -1.07897300 | 0.49806700  |
| H | -4.25193200 | -1.68586800 | 1.14294600  |
| C | -6.95470400 | -0.41370000 | -0.47871200 |
| H | -6.87802100 | 0.65539300  | -2.34854100 |
| H | -6.70579500 | -1.50153100 | 1.36730400  |



|   |             |             |             |
|---|-------------|-------------|-------------|
| H | -8.03161800 | -0.32205200 | -0.37511600 |
| H | -2.51098900 | -2.66780300 | -0.03248900 |
| C | -0.20768800 | -3.37121300 | -0.96095600 |
| C | -0.78781600 | -3.81333900 | -2.29161900 |
| C | 0.69868600  | -3.64876400 | -2.12887000 |
| H | -0.21337400 | -4.12444900 | -0.17473500 |
| H | -1.31501000 | -3.06406700 | -2.87521300 |
| H | -1.20389400 | -4.81393600 | -2.36100800 |
| H | 1.31948900  | -4.53669400 | -2.06500900 |
| H | 1.17797500  | -2.79657100 | -2.59405700 |

**TS-4i**

|    |             |             |             |
|----|-------------|-------------|-------------|
| N  | -1.72761100 | 0.43022200  | -0.21998600 |
| C  | -2.19865700 | -1.53227200 | -0.71085300 |
| C  | -1.13213400 | -2.31560600 | -0.40435200 |
| C  | 0.43003200  | 2.45583800  | 2.22567400  |
| C  | -0.97300900 | 2.22890200  | 2.38186800  |
| C  | -1.13986200 | 0.85134800  | 2.74190600  |
| C  | 0.16843500  | 0.24918000  | 2.87981900  |
| C  | 1.14902900  | 1.24909900  | 2.56209800  |
| Rh | -0.12842400 | 0.79092400  | 0.74663800  |
| C  | -1.91710500 | -0.16033200 | -1.38727100 |
| O  | -2.01767200 | 0.11613200  | -2.56387800 |
| C  | 2.63344000  | 1.12736600  | 2.71846500  |
| H  | 2.93885300  | 1.41574300  | 3.73201200  |
| H  | 2.98129600  | 0.10688800  | 2.54410900  |
| H  | 3.16187400  | 1.78084500  | 2.01976700  |
| C  | 1.04675500  | 3.74878600  | 1.79763700  |
| H  | 1.26116700  | 4.37638200  | 2.67135000  |
| H  | 1.98520400  | 3.58227900  | 1.26461000  |
| H  | 0.37133500  | 4.29232600  | 1.13577400  |
| C  | -2.05732300 | 3.23389700  | 2.15351900  |
| H  | -2.01632500 | 4.03052100  | 2.90559200  |
| H  | -1.95498200 | 3.67699100  | 1.15987400  |
| H  | -3.04134200 | 2.76480700  | 2.21407700  |
| C  | -2.44454300 | 0.16131800  | 2.99113700  |
| H  | -2.83786900 | 0.42979600  | 3.97863700  |
| H  | -3.18547100 | 0.43993100  | 2.23934400  |
| H  | -2.32998100 | -0.92375100 | 2.95594600  |
| C  | 0.42132600  | -1.12781200 | 3.41027400  |
| H  | 0.13536300  | -1.18548700 | 4.46720800  |
| H  | -0.15492400 | -1.87974500 | 2.86475900  |
| H  | 1.47628400  | -1.39106400 | 3.33629300  |
| O  | -1.00650700 | 3.26316900  | -0.89148400 |

|   |             |             |             |
|---|-------------|-------------|-------------|
| C | 0.01847300  | 2.80205400  | -1.38611700 |
| O | 0.69428000  | 1.78745000  | -0.89381500 |
| C | 0.63307200  | 3.36513400  | -2.68529500 |
| C | 0.42308100  | 2.31304600  | -3.79648100 |
| H | -0.63178200 | 2.04095000  | -3.88419200 |
| H | 0.76483000  | 2.71776300  | -4.75529000 |
| H | 0.98442800  | 1.39653100  | -3.59823400 |
| C | -0.08721400 | 4.66663100  | -3.05981500 |
| H | 0.02908800  | 5.42173500  | -2.27689300 |
| H | 0.32885800  | 5.06691900  | -3.99055500 |
| H | -1.15647600 | 4.49454900  | -3.19790400 |
| C | 2.13664700  | 3.63211700  | -2.48428900 |
| H | 2.30456500  | 4.34700500  | -1.67083800 |
| H | 2.68292400  | 2.71559700  | -2.25054000 |
| H | 2.56287600  | 4.05926700  | -3.39819700 |
| C | 0.28567400  | -1.98366800 | -0.49129900 |
| C | 0.86408100  | -0.82323000 | -0.08313700 |
| C | 2.32773500  | -0.47041200 | -0.36018000 |
| O | 2.46198000  | -0.05004400 | -1.71612300 |
| H | 1.86046400  | 0.71823400  | -1.76610700 |
| H | 2.57340300  | 0.38903400  | 0.27458400  |
| C | 3.37181700  | -1.52096800 | -0.03201700 |
| C | 3.25252600  | -2.32991400 | 1.10313100  |
| C | 4.52533800  | -1.62185700 | -0.81553700 |
| C | 4.26109900  | -3.22953200 | 1.44748500  |
| H | 2.34512900  | -2.28144200 | 1.69439600  |
| C | 5.53366200  | -2.52366200 | -0.47397400 |
| H | 4.61160600  | -0.99739800 | -1.69660500 |
| C | 5.40780200  | -3.33029600 | 0.65822000  |
| H | 4.14656100  | -3.85742800 | 2.32664600  |
| H | 6.42087900  | -2.59724000 | -1.09653400 |
| H | 6.19318900  | -4.03253300 | 0.92119200  |
| C | -3.61709900 | -1.90863000 | -0.54449300 |
| C | -4.58506800 | -0.93789600 | -0.24052900 |
| C | -4.02458500 | -3.24377800 | -0.70019800 |
| C | -5.91942200 | -1.29986500 | -0.06936400 |
| H | -4.27973200 | 0.09659700  | -0.12786100 |
| C | -5.35980500 | -3.60037200 | -0.52823000 |
| H | -3.29815600 | -4.00009600 | -0.97978800 |
| C | -6.31268800 | -2.63146600 | -0.20809900 |
| H | -6.65393600 | -0.53697700 | 0.17059500  |
| H | -5.65795900 | -4.63679300 | -0.65529400 |
| H | -7.35364500 | -2.91121200 | -0.07892500 |
| H | -1.34139900 | -3.35780500 | -0.16355800 |

|   |             |             |             |
|---|-------------|-------------|-------------|
| C | 1.06828000  | -3.16359600 | -1.03923300 |
| C | 0.59511300  | -3.84114200 | -2.31145400 |
| C | 1.88252500  | -3.06389700 | -2.30125600 |
| H | 1.46793400  | -3.82601600 | -0.27396200 |
| H | -0.25169500 | -3.40009800 | -2.82975300 |
| H | 0.63607600  | -4.92528100 | -2.35903500 |
| H | 2.82201000  | -3.60648400 | -2.32052600 |
| H | 1.91066000  | -2.09770600 | -2.78917000 |

**TS-3ii**

|    |             |             |             |
|----|-------------|-------------|-------------|
| N  | 0.08024200  | -0.43700600 | -0.64130400 |
| C  | -2.18426300 | -1.20501400 | -0.45680000 |
| C  | -1.98583300 | -1.42187200 | 0.91126200  |
| C  | -0.25533500 | 3.55255200  | -0.25033100 |
| C  | -1.46741800 | 2.86068200  | -0.37734600 |
| C  | -1.77756700 | 2.25766600  | 0.92220500  |
| C  | -0.78183400 | 2.68878800  | 1.87247600  |
| C  | 0.20654700  | 3.39764200  | 1.13846600  |
| Rh | 0.11934300  | 1.35016600  | 0.36107900  |
| C  | -1.09013400 | -0.86257000 | -1.34241800 |
| O  | -1.07263400 | -0.89793800 | -2.57741100 |
| C  | 1.46615600  | 3.99819100  | 1.68270200  |
| H  | 1.31962600  | 5.05824000  | 1.92525300  |
| H  | 1.78846500  | 3.48281300  | 2.58972700  |
| H  | 2.27885400  | 3.93663800  | 0.95352200  |
| C  | 0.51057900  | 4.28169300  | -1.31029900 |
| H  | 0.52277300  | 5.36155400  | -1.11857000 |
| H  | 1.55196600  | 3.94497300  | -1.34510700 |
| H  | 0.07501900  | 4.12075900  | -2.29863300 |
| C  | -2.29729000 | 2.65518800  | -1.60531200 |
| H  | -3.27691300 | 3.13575900  | -1.49899200 |
| H  | -1.81155800 | 3.06754000  | -2.49179000 |
| H  | -2.47172000 | 1.59008400  | -1.78774400 |
| C  | -3.07251300 | 1.60079600  | 1.27074300  |
| H  | -3.75746500 | 2.33635000  | 1.71218200  |
| H  | -3.55405500 | 1.17346400  | 0.39179800  |
| H  | -2.92509500 | 0.79613600  | 1.99410300  |
| C  | -0.79078800 | 2.38325300  | 3.33740600  |
| H  | -1.38776100 | 3.12097400  | 3.88833700  |
| H  | -1.22479500 | 1.39709700  | 3.52175800  |
| H  | 0.21992200  | 2.38550900  | 3.75121400  |
| O  | 1.21266100  | -0.55089500 | -1.57973200 |
| C  | 2.18599400  | 0.29148200  | -1.36349700 |
| O  | 2.13973300  | 1.15744100  | -0.46421400 |

|   |             |             |             |
|---|-------------|-------------|-------------|
| C | 3.32827700  | 0.21029600  | -2.36112300 |
| C | 3.42968200  | -1.19016300 | -2.98517700 |
| H | 2.50483500  | -1.46605100 | -3.49546600 |
| H | 4.24504600  | -1.19398900 | -3.71511700 |
| H | 3.64159800  | -1.94546200 | -2.22602400 |
| C | 2.98430500  | 1.25506900  | -3.45294100 |
| H | 2.90725600  | 2.25969800  | -3.02696000 |
| H | 3.77863900  | 1.25838900  | -4.20517600 |
| H | 2.04015600  | 1.00870900  | -3.94690600 |
| C | 4.64067400  | 0.59159800  | -1.65771800 |
| H | 4.57302600  | 1.58164500  | -1.20127000 |
| H | 4.88802300  | -0.13504700 | -0.88013200 |
| H | 5.45179500  | 0.60081400  | -2.39155900 |
| C | -0.83318600 | -1.25292900 | 1.68812200  |
| C | 0.28197000  | -0.50068700 | 1.24674800  |
| C | 1.65570500  | -0.85527100 | 1.81357200  |
| O | 2.45970200  | 0.26610600  | 2.15830600  |
| H | 2.60005100  | 0.77947200  | 1.34792200  |
| H | 1.44680600  | -1.32379000 | 2.77861700  |
| C | 2.42335500  | -1.89802100 | 0.99731800  |
| C | 1.76602000  | -2.91003200 | 0.28628300  |
| C | 3.82222700  | -1.89502900 | 1.03015600  |
| C | 2.49390300  | -3.89883400 | -0.37373800 |
| H | 0.68343500  | -2.91374200 | 0.23587600  |
| C | 4.55159900  | -2.88336200 | 0.36581500  |
| H | 4.32825700  | -1.11680100 | 1.59003800  |
| C | 3.88995900  | -3.89183300 | -0.33583200 |
| H | 1.96751200  | -4.67118600 | -0.92638500 |
| H | 5.63713700  | -2.86683300 | 0.40307800  |
| H | 4.45528800  | -4.66240100 | -0.85127300 |
| C | -3.54266400 | -1.39602900 | -1.02039100 |
| C | -3.77121400 | -1.74886400 | -2.36726700 |
| C | -4.67847200 | -1.22971800 | -0.19816600 |
| C | -5.06449900 | -1.93412600 | -2.85088500 |
| H | -2.92116300 | -1.86915600 | -3.02301900 |
| C | -5.96896100 | -1.42159100 | -0.68493100 |
| H | -4.55424200 | -0.92729100 | 0.83559200  |
| C | -6.17327900 | -1.77542000 | -2.01857700 |
| H | -5.20419100 | -2.21067800 | -3.89247100 |
| H | -6.81689500 | -1.28064100 | -0.02019900 |
| H | -7.17872500 | -1.91832100 | -2.40344900 |
| H | -2.82515900 | -1.87512300 | 1.42698600  |
| C | -0.76876500 | -1.90852700 | 3.04667000  |
| C | -1.67026500 | -3.05250800 | 3.44450100  |

|   |             |             |            |
|---|-------------|-------------|------------|
| C | -0.19811100 | -3.30134600 | 3.26071800 |
| H | -0.54782500 | -1.21919800 | 3.86167800 |
| H | -2.33975000 | -3.47148700 | 2.70158100 |
| H | -2.07440500 | -3.04744400 | 4.45191400 |
| H | 0.42086100  | -3.47284800 | 4.13654800 |
| H | 0.11020300  | -3.85214300 | 2.37901700 |

**INT-4ii**

|    |             |             |             |
|----|-------------|-------------|-------------|
| N  | 0.20487000  | -0.46769000 | -0.33516900 |
| C  | -2.01529400 | -1.44519800 | -0.32986700 |
| C  | -1.88089100 | -1.42418000 | 1.08760500  |
| C  | -0.56613600 | 3.49450700  | -0.76285400 |
| C  | -1.69768900 | 2.67123400  | -0.68786900 |
| C  | -1.88457700 | 2.29821100  | 0.71852300  |
| C  | -0.92166600 | 3.01440700  | 1.51637400  |
| C  | -0.04026400 | 3.65777800  | 0.60333700  |
| Rh | 0.08980800  | 1.51792100  | 0.21579500  |
| C  | -0.93952900 | -1.03013300 | -1.13957500 |
| O  | -0.78728300 | -0.96381800 | -2.36048300 |
| C  | 1.15343700  | 4.49124900  | 0.95509500  |
| H  | 0.88628300  | 5.55460300  | 1.00231900  |
| H  | 1.56514100  | 4.20267200  | 1.92482500  |
| H  | 1.94366900  | 4.38228600  | 0.20755000  |
| C  | 0.07406500  | 4.07459700  | -1.98541200 |
| H  | -0.06249200 | 5.16220800  | -2.02902500 |
| H  | 1.15113200  | 3.87889600  | -1.99351200 |
| H  | -0.34845300 | 3.64388500  | -2.89546500 |
| C  | -2.55153500 | 2.15470500  | -1.80146900 |
| H  | -3.57091300 | 2.55192600  | -1.72517300 |
| H  | -2.14998900 | 2.43229300  | -2.77760800 |
| H  | -2.62216800 | 1.06298300  | -1.77094600 |
| C  | -3.07349500 | 1.55910300  | 1.24147400  |
| H  | -3.87645100 | 2.26923400  | 1.47813800  |
| H  | -3.45514900 | 0.85049300  | 0.50605700  |
| H  | -2.83392500 | 1.00180100  | 2.14837700  |
| C  | -0.86466400 | 3.05198800  | 3.01201900  |
| H  | -1.42889700 | 3.90844900  | 3.40426700  |
| H  | -1.29770100 | 2.14648100  | 3.44289500  |
| H  | 0.16360900  | 3.13477700  | 3.37169500  |
| O  | 1.41209300  | -0.75598900 | -1.11047600 |
| C  | 2.22353700  | 0.26489300  | -1.30175700 |
| O  | 2.07961200  | 1.34539100  | -0.70709500 |
| C  | 3.30079400  | 0.01724200  | -2.33850000 |
| C  | 3.37080600  | -1.46337900 | -2.74341400 |

|   |             |             |             |
|---|-------------|-------------|-------------|
| H | 2.42006700  | -1.80338100 | -3.15931500 |
| H | 4.14758700  | -1.58217500 | -3.50477400 |
| H | 3.62114700  | -2.09914400 | -1.89185300 |
| C | 2.88650300  | 0.88157300  | -3.55597900 |
| H | 2.84349300  | 1.94085800  | -3.28961800 |
| H | 3.62539400  | 0.74991500  | -4.35187700 |
| H | 1.90827300  | 0.57326000  | -3.93633200 |
| C | 4.64804100  | 0.49810900  | -1.76984500 |
| H | 4.59443300  | 1.54260700  | -1.45373700 |
| H | 4.94712300  | -0.11219900 | -0.91361500 |
| H | 5.41674700  | 0.40666200  | -2.54242200 |
| C | -0.80352200 | -0.97767300 | 1.80552800  |
| C | 0.35554000  | -0.42279900 | 1.11435200  |
| C | 1.71991600  | -0.70877600 | 1.77803100  |
| O | 2.58369400  | 0.41057000  | 1.93583500  |
| H | 2.50364300  | 0.97728800  | 1.15602100  |
| H | 1.45709800  | -0.98011800 | 2.80015100  |
| C | 2.43898200  | -1.92145700 | 1.18963800  |
| C | 1.72307600  | -3.06220200 | 0.80364200  |
| C | 3.83198700  | -1.92446400 | 1.08265300  |
| C | 2.39119300  | -4.17676600 | 0.30057000  |
| H | 0.63950000  | -3.06990500 | 0.87467500  |
| C | 4.50139700  | -3.04364100 | 0.58163300  |
| H | 4.37877000  | -1.04458000 | 1.40143400  |
| C | 3.78352200  | -4.17214000 | 0.18492200  |
| H | 1.82222900  | -5.04874900 | -0.00797300 |
| H | 5.58498100  | -3.03214300 | 0.50356500  |
| H | 4.30210700  | -5.04109300 | -0.20877300 |
| C | -3.29609800 | -1.83431200 | -0.95313200 |
| C | -3.37584200 | -2.28555100 | -2.28781500 |
| C | -4.50357000 | -1.75794700 | -0.22615900 |
| C | -4.59591100 | -2.65145600 | -2.85046100 |
| H | -2.46942400 | -2.33675800 | -2.87524400 |
| C | -5.72060900 | -2.12890200 | -0.79260800 |
| H | -4.49898700 | -1.38472700 | 0.79261900  |
| C | -5.77800900 | -2.58111600 | -2.11096400 |
| H | -4.62066500 | -2.99950800 | -3.87970400 |
| H | -6.62920200 | -2.05340800 | -0.20116900 |
| H | -6.72656500 | -2.86735800 | -2.55542500 |
| H | -2.72207000 | -1.80442900 | 1.65415400  |
| C | -0.77975000 | -0.99676700 | 3.30037600  |
| C | -1.74820400 | -1.81629100 | 4.11424700  |
| C | -0.29524400 | -2.20877500 | 4.08474300  |
| H | -0.50153700 | -0.04273300 | 3.74718200  |

|   |             |             |            |
|---|-------------|-------------|------------|
| H | -2.44953700 | -2.46149500 | 3.59649300 |
| H | -2.14422600 | -1.37228300 | 5.02209400 |
| H | 0.31004200  | -2.04485300 | 4.97155600 |
| H | -0.02629100 | -3.08843100 | 3.50815900 |

**TS-4ii**

|    |             |             |             |
|----|-------------|-------------|-------------|
| N  | 0.91144300  | -1.02278200 | -1.04782600 |
| C  | 2.77702800  | 0.33795000  | -1.00770000 |
| C  | 2.09466200  | 1.45625900  | -0.65973200 |
| C  | -1.00870200 | -2.06251500 | 2.28576500  |
| C  | 0.23454200  | -2.67262500 | 1.95339600  |
| C  | 1.24181200  | -1.64108800 | 1.96110200  |
| C  | 0.62523600  | -0.40794800 | 2.37704400  |
| C  | -0.78676700 | -0.66110100 | 2.55090600  |
| Rh | -0.22757400 | -0.93388500 | 0.41363400  |
| C  | 2.08773600  | -0.87887200 | -1.61666600 |
| O  | 2.57886600  | -1.59063100 | -2.50428700 |
| C  | -1.80975100 | 0.28197000  | 3.10033900  |
| H  | -1.85916600 | 0.19601700  | 4.19302800  |
| H  | -1.58608500 | 1.32058100  | 2.85509500  |
| H  | -2.80368600 | 0.05557500  | 2.70715400  |
| C  | -2.33176200 | -2.75217700 | 2.37635900  |
| H  | -2.58337300 | -2.94848000 | 3.42574200  |
| H  | -3.12431700 | -2.12841100 | 1.95517400  |
| H  | -2.32015600 | -3.69326100 | 1.82827500  |
| C  | 0.44341100  | -4.10830000 | 1.60238600  |
| H  | 0.24231900  | -4.75101900 | 2.46746500  |
| H  | -0.23511800 | -4.38877800 | 0.79265100  |
| H  | 1.46849300  | -4.28812300 | 1.27436000  |
| C  | 2.70011500  | -1.85447800 | 1.70670900  |
| H  | 3.14674000  | -2.41488000 | 2.53620200  |
| H  | 2.86658500  | -2.42234700 | 0.78836500  |
| H  | 3.23187600  | -0.90910100 | 1.60983000  |
| C  | 1.35701100  | 0.85555900  | 2.69633500  |
| H  | 2.03530300  | 0.69016500  | 3.54110900  |
| H  | 1.95145500  | 1.19305500  | 1.84407100  |
| H  | 0.66687200  | 1.65461000  | 2.96797300  |
| O  | -1.69992900 | -3.41677000 | -0.64230900 |
| C  | -2.33746600 | -2.41672500 | -0.95708800 |
| O  | -2.02569000 | -1.18832600 | -0.59924700 |
| C  | -3.60054500 | -2.48580200 | -1.84216300 |
| C  | -3.20002400 | -2.00687600 | -3.25474200 |
| H  | -2.38992000 | -2.62079300 | -3.65977100 |
| H  | -4.05859800 | -2.08439300 | -3.93011300 |

|   |             |             |             |
|---|-------------|-------------|-------------|
| H | -2.86753400 | -0.96513600 | -3.25248900 |
| C | -4.08934400 | -3.93859400 | -1.90656300 |
| H | -4.36901800 | -4.30388200 | -0.91375900 |
| H | -4.96753700 | -4.00671900 | -2.55721000 |
| H | -3.30998500 | -4.59684400 | -2.29493600 |
| C | -4.70768300 | -1.57880100 | -1.27323700 |
| H | -4.98010700 | -1.88232900 | -0.25609000 |
| H | -4.40068700 | -0.53138200 | -1.24539700 |
| H | -5.60549600 | -1.65669100 | -1.89538600 |
| C | 0.66609400  | 1.80399900  | -0.67916300 |
| C | -0.37030800 | 1.06945000  | -0.21295600 |
| C | -1.83093200 | 1.51879500  | -0.19524500 |
| O | -2.44111600 | 1.30303800  | -1.46499600 |
| H | -2.42168500 | 0.33220000  | -1.54642900 |
| H | -2.34957800 | 0.88034000  | 0.53036600  |
| C | -2.09240400 | 2.94084500  | 0.27529600  |
| C | -1.35544300 | 3.51324200  | 1.31843600  |
| C | -3.16075700 | 3.66057000  | -0.26827000 |
| C | -1.67274200 | 4.78054700  | 1.80580200  |
| H | -0.50178300 | 2.97942800  | 1.72107700  |
| C | -3.47664700 | 4.93057900  | 0.21563400  |
| H | -3.72648400 | 3.21759800  | -1.07878400 |
| C | -2.73645400 | 5.49635600  | 1.25452900  |
| H | -1.08239400 | 5.21215500  | 2.60919100  |
| H | -4.30460100 | 5.48034000  | -0.22289600 |
| H | -2.98289700 | 6.48544800  | 1.62868200  |
| C | 4.23801100  | 0.24230500  | -0.78034500 |
| C | 5.08917200  | -0.43798100 | -1.67110000 |
| C | 4.80931400  | 0.84868300  | 0.35596600  |
| C | 6.46058900  | -0.49482500 | -1.43004700 |
| H | 4.65404800  | -0.91614000 | -2.53818300 |
| C | 6.18090900  | 0.79514900  | 0.58749100  |
| H | 4.16802300  | 1.35613500  | 1.07011700  |
| C | 7.01430000  | 0.12022400  | -0.30631200 |
| H | 7.10173100  | -1.02082600 | -2.13126500 |
| H | 6.59688700  | 1.27010600  | 1.47128000  |
| H | 8.08389900  | 0.07115800  | -0.12537400 |
| H | 2.71655100  | 2.31313400  | -0.39895900 |
| C | 0.49827600  | 3.22164100  | -1.18983000 |
| C | 1.00610600  | 3.54647700  | -2.58106500 |
| C | -0.46872900 | 3.58232500  | -2.28324700 |
| H | 0.67363100  | 3.98815200  | -0.43682100 |
| H | 1.38095000  | 2.72035500  | -3.17822100 |
| H | 1.53833100  | 4.48194600  | -2.72462000 |



|   |             |            |             |
|---|-------------|------------|-------------|
| H | -0.96261800 | 4.54531800 | -2.20375400 |
| H | -1.09439700 | 2.78624100 | -2.66692100 |

**INT-5ii**

|    |             |             |             |
|----|-------------|-------------|-------------|
| N  | 0.67183300  | -0.96579700 | -1.24133600 |
| C  | 2.71526200  | 0.34002300  | -0.89485900 |
| C  | 2.03986500  | 1.49779700  | -0.67042600 |
| C  | -0.90579600 | -1.97714800 | 2.33819000  |
| C  | 0.36251700  | -2.53370300 | 1.97254900  |
| C  | 1.34266400  | -1.47138100 | 2.00028700  |
| C  | 0.66731600  | -0.26942300 | 2.39323700  |
| C  | -0.73251200 | -0.58062200 | 2.59525800  |
| Rh | -0.17564800 | -0.94442800 | 0.41847900  |
| C  | 2.03816500  | -0.94922400 | -1.22227600 |
| O  | 2.63854000  | -2.00138300 | -1.48134800 |
| C  | -1.78542900 | 0.34086300  | 3.12500400  |
| H  | -1.81095000 | 0.30379900  | 4.22116200  |
| H  | -1.61477800 | 1.37711000  | 2.83209800  |
| H  | -2.77623100 | 0.05579500  | 2.76365600  |
| C  | -2.18953200 | -2.73571200 | 2.44680900  |
| H  | -2.32483600 | -3.10182100 | 3.47192800  |
| H  | -3.04370500 | -2.10002100 | 2.20320800  |
| H  | -2.19415600 | -3.58266000 | 1.76164100  |
| C  | 0.63172300  | -3.96058900 | 1.62699100  |
| H  | 0.59427500  | -4.58281900 | 2.53007100  |
| H  | -0.11698500 | -4.31818000 | 0.91735800  |
| H  | 1.61714100  | -4.07297400 | 1.17194800  |
| C  | 2.81664300  | -1.65493400 | 1.82509500  |
| H  | 3.21786600  | -2.23738400 | 2.66267100  |
| H  | 3.05444900  | -2.18635800 | 0.89978300  |
| H  | 3.33944600  | -0.69899000 | 1.79803900  |
| C  | 1.33800100  | 1.02859800  | 2.70436200  |
| H  | 1.83701500  | 0.95938100  | 3.67863200  |
| H  | 2.09125700  | 1.27344000  | 1.95444500  |
| H  | 0.62280000  | 1.84910800  | 2.75079700  |
| O  | -1.59331200 | -3.51263600 | -0.57653800 |
| C  | -2.22509800 | -2.53333600 | -0.96744000 |
| O  | -1.93573500 | -1.29103600 | -0.66354500 |
| C  | -3.45924500 | -2.66500500 | -1.88621000 |
| C  | -3.04420200 | -2.19472700 | -3.29640900 |
| H  | -2.20320800 | -2.78552500 | -3.67218800 |
| H  | -3.88297600 | -2.31330000 | -3.99076600 |
| H  | -2.74710600 | -1.14265600 | -3.30116800 |
| C  | -3.89805500 | -4.13394900 | -1.93659900 |

|   |             |             |             |
|---|-------------|-------------|-------------|
| H | -4.18744200 | -4.49198300 | -0.94411200 |
| H | -4.75799400 | -4.24326800 | -2.60607500 |
| H | -3.08796600 | -4.77209800 | -2.29486100 |
| C | -4.60965800 | -1.78779900 | -1.35674500 |
| H | -4.89295300 | -2.08488700 | -0.34065100 |
| H | -4.33715800 | -0.73050300 | -1.33853900 |
| H | -5.49115300 | -1.90428100 | -1.99631600 |
| C | 0.61562700  | 1.84767100  | -0.64454500 |
| C | -0.40229700 | 1.08253400  | -0.19344700 |
| C | -1.88728800 | 1.44207300  | -0.21490600 |
| O | -2.42998500 | 1.17282200  | -1.50184000 |
| H | -2.35645900 | 0.19958100  | -1.56603600 |
| H | -2.38518400 | 0.77991700  | 0.50398900  |
| C | -2.24767100 | 2.85590200  | 0.21618400  |
| C | -1.56715800 | 3.50963000  | 1.24889600  |
| C | -3.35253100 | 3.48559700  | -0.36527100 |
| C | -1.97424500 | 4.76818200  | 1.68980600  |
| H | -0.68632200 | 3.04839900  | 1.68117000  |
| C | -3.75929400 | 4.74647700  | 0.07205800  |
| H | -3.87486300 | 2.98094700  | -1.16879600 |
| C | -3.07417400 | 5.39369700  | 1.10117500  |
| H | -1.42556200 | 5.26338600  | 2.48592100  |
| H | -4.61503100 | 5.22504000  | -0.39558900 |
| H | -3.39090600 | 6.37587800  | 1.43874800  |
| C | 4.19764100  | 0.32832200  | -0.81717700 |
| C | 4.98477900  | -0.38239200 | -1.73954300 |
| C | 4.84927300  | 1.05646200  | 0.19328900  |
| C | 6.37503300  | -0.34921900 | -1.65503800 |
| H | 4.50127100  | -0.95987000 | -2.51597500 |
| C | 6.23955500  | 1.08895700  | 0.27537400  |
| H | 4.25677400  | 1.59283500  | 0.92890200  |
| C | 7.00922600  | 0.38391300  | -0.65048000 |
| H | 6.96632800  | -0.89997600 | -2.38045900 |
| H | 6.71982100  | 1.65649200  | 1.06705500  |
| H | 8.09301800  | 0.40134900  | -0.58674600 |
| H | 2.67295100  | 2.37712900  | -0.56265300 |
| C | 0.41522500  | 3.26563000  | -1.13738400 |
| C | 0.91849300  | 3.61681000  | -2.52507700 |
| C | -0.55755100 | 3.60831000  | -2.23095300 |
| H | 0.56775900  | 4.03004200  | -0.37746200 |
| H | 1.31600900  | 2.80732300  | -3.13039600 |
| H | 1.42554800  | 4.56762900  | -2.65817900 |
| H | -1.07901400 | 4.55593400  | -2.14540500 |
| H | -1.15714300 | 2.79703300  | -2.62557800 |

**TS-5ii**

|    |             |             |             |
|----|-------------|-------------|-------------|
| N  | 0.62973300  | -0.85133900 | -1.25700800 |
| C  | 2.71717800  | 0.39942600  | -0.90352100 |
| C  | 2.05878200  | 1.55780700  | -0.64204600 |
| C  | -0.87481100 | -2.02939400 | 2.31953700  |
| C  | 0.38992000  | -2.57285500 | 1.92698000  |
| C  | 1.36662900  | -1.50699100 | 1.96589800  |
| C  | 0.69340900  | -0.31610000 | 2.39448600  |
| C  | -0.70412700 | -0.63593300 | 2.60335800  |
| Rh | -0.17801600 | -0.94643300 | 0.43316600  |
| C  | 1.99723400  | -0.84886800 | -1.27957800 |
| O  | 2.55834400  | -1.90102000 | -1.61776400 |
| C  | -1.76080500 | 0.26915700  | 3.15390800  |
| H  | -1.80944500 | 0.18434800  | 4.24662300  |
| H  | -1.57761700 | 1.31554700  | 2.90966500  |
| H  | -2.74581700 | 0.00799800  | 2.75957800  |
| C  | -2.15582000 | -2.79247600 | 2.42785500  |
| H  | -2.28558100 | -3.16618100 | 3.45094400  |
| H  | -3.01222500 | -2.15668800 | 2.19254300  |
| H  | -2.16165500 | -3.63381000 | 1.73601200  |
| C  | 0.66086800  | -3.99082200 | 1.54785900  |
| H  | 0.64283600  | -4.63186000 | 2.43829600  |
| H  | -0.09765400 | -4.33753200 | 0.84351600  |
| H  | 1.63911200  | -4.08845800 | 1.07411100  |
| C  | 2.83672900  | -1.68290000 | 1.75298300  |
| H  | 3.25660800  | -2.29600100 | 2.55887700  |
| H  | 3.05326500  | -2.18082400 | 0.80390500  |
| H  | 3.35975300  | -0.72695400 | 1.74936500  |
| C  | 1.36100800  | 0.98078700  | 2.71844300  |
| H  | 1.85692300  | 0.90545600  | 3.69382000  |
| H  | 2.11570800  | 1.23339000  | 1.97255800  |
| H  | 0.64407800  | 1.79994000  | 2.76856400  |
| O  | -1.59265400 | -3.50684200 | -0.61073000 |
| C  | -2.23358000 | -2.52129000 | -0.97067700 |
| O  | -1.94943300 | -1.28525800 | -0.64015900 |
| C  | -3.47297200 | -2.64107100 | -1.88493500 |
| C  | -3.04918500 | -2.19349900 | -3.30019100 |
| H  | -2.21907800 | -2.80360300 | -3.66907400 |
| H  | -3.88993500 | -2.30352200 | -3.99360200 |
| H  | -2.73283800 | -1.14696300 | -3.31680800 |
| C  | -3.93521500 | -4.10341600 | -1.92097100 |
| H  | -4.23296500 | -4.44587400 | -0.92526700 |
| H  | -4.79557000 | -4.20656200 | -2.59094500 |

|   |             |             |             |
|---|-------------|-------------|-------------|
| H | -3.13429900 | -4.75780800 | -2.27006500 |
| C | -4.60962900 | -1.74020000 | -1.36697500 |
| H | -4.89860600 | -2.02108300 | -0.34792500 |
| H | -4.32031600 | -0.68736800 | -1.35976000 |
| H | -5.49231100 | -1.84974800 | -2.00623900 |
| C | 0.63429100  | 1.89257200  | -0.61773000 |
| C | -0.37766700 | 1.09298700  | -0.20954300 |
| C | -1.86915800 | 1.43163900  | -0.25001800 |
| O | -2.38592000 | 1.18015600  | -1.54980300 |
| H | -2.32276900 | 0.20707900  | -1.61757100 |
| H | -2.36962600 | 0.74964600  | 0.44712700  |
| C | -2.25451200 | 2.82950900  | 0.20940400  |
| C | -1.61383100 | 3.45337000  | 1.28530400  |
| C | -3.34731200 | 3.46755800  | -0.38489700 |
| C | -2.04707800 | 4.69245800  | 1.75487500  |
| H | -0.74376700 | 2.98412300  | 1.73111800  |
| C | -3.78078300 | 4.70900900  | 0.08193800  |
| H | -3.84009500 | 2.98468500  | -1.21985700 |
| C | -3.13469800 | 5.32733800  | 1.15307100  |
| H | -1.52935200 | 5.16501100  | 2.58478000  |
| H | -4.62701700 | 5.19475300  | -0.39547500 |
| H | -3.47236400 | 6.29417700  | 1.51383400  |
| C | 4.19660600  | 0.34855800  | -0.81877400 |
| C | 4.97095700  | -0.36939700 | -1.74689500 |
| C | 4.86135000  | 1.04700700  | 0.20476300  |
| C | 6.36124000  | -0.37370700 | -1.65329000 |
| H | 4.47688600  | -0.92230900 | -2.53420100 |
| C | 6.25111300  | 1.04258800  | 0.29493300  |
| H | 4.27879100  | 1.58829500  | 0.94464700  |
| C | 7.00798900  | 0.32951100  | -0.63577200 |
| H | 6.94245000  | -0.92974300 | -2.38280800 |
| H | 6.74122800  | 1.58730100  | 1.09652400  |
| H | 8.09148100  | 0.31831800  | -0.56570300 |
| H | 2.69253800  | 2.43177100  | -0.50281400 |
| C | 0.41633800  | 3.32358700  | -1.06191400 |
| C | 0.95357500  | 3.73931900  | -2.41857700 |
| C | -0.53036800 | 3.68122000  | -2.17353700 |
| H | 0.52243700  | 4.06208500  | -0.26943100 |
| H | 1.39199600  | 2.96438300  | -3.04064500 |
| H | 1.43752600  | 4.70782600  | -2.50036300 |
| H | -1.08019600 | 4.61085400  | -2.07121900 |
| H | -1.09460100 | 2.86957400  | -2.61691100 |

|    |             |             |             |
|----|-------------|-------------|-------------|
| N  | -0.24973400 | 0.26147500  | 0.88189700  |
| C  | 1.01688800  | 2.30094000  | 1.04171500  |
| C  | -0.17233700 | 2.95354600  | 0.72916800  |
| C  | 0.71025400  | -3.63613100 | -0.34711500 |
| C  | 1.78317900  | -3.45317600 | 0.58191300  |
| C  | 1.19650500  | -3.12776700 | 1.87485200  |
| C  | -0.22566000 | -3.10394100 | 1.72315000  |
| C  | -0.53689900 | -3.39708400 | 0.33457500  |
| Rh | 0.67080400  | -1.59541500 | 0.43256500  |
| C  | 0.94494100  | 0.88013700  | 1.05564100  |
| O  | 1.91971400  | 0.02532300  | 1.12568200  |
| C  | -1.89823500 | -3.54556200 | -0.27591800 |
| H  | -2.05320900 | -4.57504400 | -0.61825500 |
| H  | -2.68368200 | -3.31444600 | 0.44593200  |
| H  | -2.02829100 | -2.87514900 | -1.12996800 |
| C  | 0.84611100  | -3.97059300 | -1.79742400 |
| H  | 0.85985400  | -5.05951400 | -1.92921100 |
| H  | 0.00460600  | -3.57040300 | -2.36693900 |
| H  | 1.76498200  | -3.54944700 | -2.20597700 |
| C  | 3.24134700  | -3.58425700 | 0.27876500  |
| H  | 3.53629400  | -4.64019300 | 0.24425900  |
| H  | 3.46531200  | -3.11289700 | -0.67976400 |
| H  | 3.84324900  | -3.08910600 | 1.04325300  |
| C  | 1.97283200  | -2.86041000 | 3.12451900  |
| H  | 2.34136900  | -3.79845800 | 3.55625700  |
| H  | 2.83202700  | -2.21859800 | 2.91589700  |
| H  | 1.35865300  | -2.35848400 | 3.87411800  |
| C  | -1.22762200 | -2.82526900 | 2.79855500  |
| H  | -1.54574900 | -3.76045600 | 3.27474800  |
| H  | -0.80933000 | -2.17625900 | 3.57001300  |
| H  | -2.11649700 | -2.33462900 | 2.39649200  |
| O  | 2.68644500  | -1.26356300 | -1.99368200 |
| C  | 1.67140700  | -0.59480100 | -2.17776700 |
| O  | 0.59186200  | -0.65961700 | -1.43403600 |
| C  | 1.55386700  | 0.43922600  | -3.31697100 |
| C  | 1.30749800  | 1.82341500  | -2.68166100 |
| H  | 2.11834300  | 2.09633900  | -1.99845300 |
| H  | 1.25144100  | 2.58960400  | -3.46281700 |
| H  | 0.37269800  | 1.83437200  | -2.11698400 |
| C  | 2.85040600  | 0.45315300  | -4.13478000 |
| H  | 3.04705300  | -0.52740800 | -4.57629100 |
| H  | 2.77633800  | 1.19075900  | -4.94119600 |
| H  | 3.70642900  | 0.70802800  | -3.50547500 |
| C  | 0.36206000  | 0.06716300  | -4.22056600 |

|   |             |             |             |
|---|-------------|-------------|-------------|
| H | 0.48279300  | -0.93814900 | -4.63930200 |
| H | -0.58230600 | 0.10048900  | -3.67224400 |
| H | 0.29279500  | 0.77152100  | -5.05670200 |
| C | -1.37155300 | 2.29054700  | 0.39317600  |
| C | -1.36502900 | 0.89746500  | 0.47114600  |
| C | -2.41678300 | -0.06610800 | -0.05043400 |
| O | -2.17703500 | -0.31309500 | -1.43336400 |
| H | -1.20662900 | -0.40337400 | -1.55277900 |
| H | -2.23918400 | -0.99383600 | 0.51207800  |
| C | -3.86094400 | 0.30871000  | 0.18427300  |
| C | -4.27147400 | 0.68507600  | 1.46861600  |
| C | -4.80861500 | 0.21655200  | -0.83627100 |
| C | -5.60731800 | 0.98761500  | 1.72429400  |
| H | -3.53480000 | 0.75976200  | 2.26509000  |
| C | -6.14780600 | 0.51679300  | -0.57969900 |
| H | -4.48219900 | -0.07812300 | -1.82619800 |
| C | -6.55137200 | 0.90641200  | 0.69756000  |
| H | -5.91168900 | 1.28865800  | 2.72253100  |
| H | -6.87688000 | 0.44795400  | -1.38201500 |
| H | -7.59276700 | 1.14316500  | 0.89416800  |
| C | 2.28625700  | 3.03174000  | 1.23300600  |
| C | 3.50999200  | 2.49095800  | 0.79872700  |
| C | 2.28784000  | 4.30837800  | 1.82013700  |
| C | 4.69004800  | 3.22010700  | 0.93336200  |
| H | 3.52395400  | 1.50162300  | 0.35853400  |
| C | 3.47040300  | 5.03135000  | 1.95591700  |
| H | 1.35686900  | 4.72792800  | 2.18962900  |
| C | 4.67778800  | 4.49127900  | 1.50945500  |
| H | 5.62451200  | 2.79076900  | 0.58377100  |
| H | 3.44997100  | 6.01444700  | 2.41731700  |
| H | 5.60053100  | 5.05401400  | 1.61521700  |
| H | -0.15946800 | 4.03566000  | 0.64552000  |
| C | -2.55162100 | 3.07866800  | -0.08135800 |
| C | -2.34635300 | 4.19785700  | -1.07932600 |
| C | -3.04609700 | 2.93327100  | -1.49982100 |
| H | -3.32807700 | 3.24417500  | 0.66227300  |
| H | -1.34058000 | 4.36512200  | -1.45294900 |
| H | -2.93476100 | 5.10225200  | -0.96013600 |
| H | -4.11891900 | 2.95493800  | -1.65644200 |
| H | -2.51441700 | 2.23179400  | -2.13300800 |

**INT-3<sub>Ph</sub>**

|   |            |             |             |
|---|------------|-------------|-------------|
| N | 0.22084800 | -0.22981500 | -1.64212300 |
| C | 1.15871300 | -3.26571800 | 0.36077000  |

|    |             |             |             |
|----|-------------|-------------|-------------|
| C  | 2.18300400  | -2.58460100 | -0.31058500 |
| C  | 2.68584100  | -1.53003300 | 0.56941600  |
| C  | 1.99705300  | -1.64084000 | 1.83302900  |
| C  | 1.00675200  | -2.65275100 | 1.68504800  |
| Rh | 0.59496300  | -1.02331400 | 0.25009700  |
| C  | 0.51024500  | 1.05033800  | -2.02401400 |
| O  | -0.20658900 | 1.81323200  | -2.66736300 |
| C  | 0.05898700  | -3.14610100 | 2.73196200  |
| H  | 0.46900800  | -4.03711800 | 3.22393800  |
| H  | -0.12927500 | -2.38245200 | 3.48588000  |
| H  | -0.90079800 | -3.43032500 | 2.29006800  |
| C  | 0.30295700  | -4.38365300 | -0.14812700 |
| H  | 0.53347600  | -5.32315500 | 0.36828400  |
| H  | -0.75832400 | -4.17256700 | 0.01790300  |
| H  | 0.44880700  | -4.54375400 | -1.21837300 |
| C  | 2.66780400  | -2.78468600 | -1.71078600 |
| H  | 3.71500600  | -3.10803200 | -1.71556700 |
| H  | 2.07733300  | -3.53444000 | -2.24097000 |
| H  | 2.60242900  | -1.84631300 | -2.26969200 |
| C  | 3.93828900  | -0.76046000 | 0.30916200  |
| H  | 4.80957300  | -1.41091800 | 0.46520100  |
| H  | 3.97708900  | -0.38543900 | -0.71416100 |
| H  | 4.03057400  | 0.09270900  | 0.97842900  |
| C  | 2.27301700  | -0.83289000 | 3.06145900  |
| H  | 3.03430500  | -1.32056000 | 3.68276300  |
| H  | 2.63170700  | 0.16295400  | 2.79423800  |
| H  | 1.36376900  | -0.70900600 | 3.65202500  |
| O  | -1.17650500 | -0.50035900 | -2.05417300 |
| C  | -1.93039200 | -1.04329600 | -1.14025700 |
| O  | -1.52428200 | -1.31433400 | 0.00951300  |
| C  | -3.32577900 | -1.43169200 | -1.60710900 |
| C  | -3.81642200 | -0.49738200 | -2.72481800 |
| H  | -3.14740600 | -0.51501100 | -3.58712300 |
| H  | -4.81176400 | -0.81879700 | -3.04651800 |
| H  | -3.88440700 | 0.53109500  | -2.36550600 |
| C  | -3.20447800 | -2.87951200 | -2.14090700 |
| H  | -2.84843800 | -3.55914500 | -1.36076800 |
| H  | -4.18808900 | -3.22452400 | -2.47343400 |
| H  | -2.51734600 | -2.93023900 | -2.99073500 |
| C  | -4.28575600 | -1.38731500 | -0.40736000 |
| H  | -3.95575600 | -2.05802900 | 0.38914100  |
| H  | -4.36029200 | -0.37790400 | 0.00182900  |
| H  | -5.28109500 | -1.70237600 | -0.73482800 |
| C  | 0.95673000  | 1.96327800  | 0.70974400  |

|   |             |             |             |
|---|-------------|-------------|-------------|
| C | 0.24942400  | 0.85164500  | 1.02351200  |
| C | -0.93015700 | 0.94154200  | 1.98621600  |
| O | -1.18742900 | -0.28552100 | 2.68620200  |
| H | -1.54276800 | -0.89604900 | 2.02369800  |
| H | -0.66776900 | 1.63021600  | 2.79792000  |
| C | -2.22885800 | 1.45792200  | 1.35863300  |
| C | -2.30166400 | 1.96161100  | 0.05744500  |
| C | -3.39535500 | 1.43260900  | 2.13652000  |
| C | -3.51071800 | 2.44253600  | -0.45158800 |
| H | -1.42148900 | 1.98641200  | -0.56839300 |
| C | -4.60327700 | 1.90965500  | 1.62986200  |
| H | -3.34659300 | 1.02574100  | 3.14159100  |
| C | -4.66551900 | 2.42062600  | 0.33040600  |
| H | -3.53776000 | 2.83672000  | -1.46325800 |
| H | -5.49594300 | 1.88381800  | 2.24858300  |
| H | -5.60436900 | 2.79642500  | -0.06582400 |
| C | 0.56830700  | 3.31917900  | 1.24436400  |
| C | 1.25963300  | 4.62247600  | 0.90114500  |
| C | -0.08556600 | 4.32318600  | 0.30686100  |
| H | 0.13650500  | 3.30413000  | 2.24050800  |
| H | 2.11308700  | 4.60894700  | 0.23418000  |
| H | 1.32386600  | 5.36363200  | 1.69278600  |
| H | -0.96262200 | 4.85759300  | 0.65745800  |
| H | -0.11201000 | 4.04871200  | -0.74375500 |
| C | 2.93587700  | 1.48242800  | -2.50828400 |
| C | 1.89133000  | 1.45901000  | -1.57980700 |
| C | 2.07776800  | 1.94440300  | -0.27262700 |
| C | 3.33819600  | 2.46573700  | 0.06028900  |
| C | 4.38185600  | 2.48833500  | -0.86273700 |
| C | 4.18475200  | 1.99114200  | -2.15264100 |
| H | 2.75611700  | 1.12045700  | -3.51629300 |
| H | 3.49420000  | 2.84972800  | 1.06353900  |
| H | 5.34903000  | 2.88957900  | -0.57448400 |
| H | 4.99205500  | 2.01058800  | -2.87839100 |

**INT-4i<sub>ph</sub>**

|    |             |             |             |
|----|-------------|-------------|-------------|
| N  | -0.77072800 | -1.81015500 | -1.05004800 |
| C  | -2.29538200 | -0.36757800 | 2.22817200  |
| C  | -2.40779200 | -1.74403600 | 1.84430600  |
| C  | -1.09643600 | -2.29721700 | 1.86314500  |
| C  | -0.16945000 | -1.27252000 | 2.31671800  |
| C  | -0.92820200 | -0.07580800 | 2.55733900  |
| Rh | -0.87130800 | -0.59678700 | 0.33241100  |
| C  | 0.06753800  | -1.90688300 | -2.11307600 |



|   |             |             |             |
|---|-------------|-------------|-------------|
| O | -0.17811200 | -1.66761200 | -3.28639000 |
| C | -0.44140800 | 1.19181900  | 3.18737000  |
| H | -0.58250300 | 1.15827500  | 4.27510000  |
| H | 0.61750900  | 1.36815700  | 2.99467700  |
| H | -0.99385100 | 2.05720800  | 2.81235600  |
| C | -3.42207100 | 0.60854200  | 2.32780000  |
| H | -3.71528100 | 0.74027300  | 3.37665300  |
| H | -3.11989800 | 1.58693100  | 1.94401200  |
| H | -4.28575900 | 0.27337500  | 1.75515300  |
| C | -3.66580700 | -2.43546600 | 1.42855800  |
| H | -4.38260100 | -2.47315300 | 2.25694500  |
| H | -4.12533400 | -1.89874300 | 0.59459100  |
| H | -3.46331400 | -3.45995300 | 1.11135000  |
| C | -0.72182800 | -3.69931800 | 1.50244800  |
| H | -0.95039900 | -4.38224500 | 2.32898100  |
| H | -1.27029300 | -4.03002300 | 0.61781200  |
| H | 0.34300800  | -3.77629000 | 1.27612700  |
| C | 1.25444700  | -1.51895800 | 2.69800000  |
| H | 1.28958700  | -2.09158700 | 3.63343700  |
| H | 1.78687200  | -2.08853100 | 1.93459000  |
| H | 1.78905700  | -0.58331100 | 2.85976200  |
| O | -3.69439500 | -0.08184400 | -0.74856300 |
| C | -3.00652000 | 0.91233000  | -0.94751100 |
| O | -1.75424200 | 1.04597500  | -0.55123700 |
| C | -3.52675000 | 2.14423400  | -1.71708200 |
| C | -2.92378400 | 2.08618400  | -3.13787900 |
| H | -3.19514400 | 1.15309500  | -3.64013100 |
| H | -3.30445500 | 2.92142700  | -3.73511300 |
| H | -1.83278500 | 2.15495200  | -3.12013900 |
| C | -5.05723500 | 2.07180800  | -1.79950500 |
| H | -5.50730100 | 2.10248800  | -0.80243200 |
| H | -5.43879900 | 2.92218800  | -2.37426200 |
| H | -5.37928700 | 1.14668700  | -2.28112600 |
| C | -3.09408900 | 3.44389400  | -1.01360100 |
| H | -3.47922500 | 3.48299300  | 0.01166500  |
| H | -2.00753300 | 3.54217600  | -0.97325900 |
| H | -3.49698600 | 4.30721700  | -1.55345300 |
| C | 2.03361000  | -0.32821900 | -0.61787600 |
| C | 0.93419500  | 0.30741400  | -0.16758900 |
| C | 0.81493800  | 1.82825900  | -0.03350000 |
| O | 0.42009600  | 2.41284800  | -1.27308300 |
| H | -0.46792900 | 2.04014300  | -1.41374600 |
| H | 0.01213900  | 2.01950700  | 0.68954600  |
| C | 2.02117000  | 2.56819200  | 0.52215400  |

|   |            |             |             |
|---|------------|-------------|-------------|
| C | 2.80357000 | 2.02617400  | 1.54785500  |
| C | 2.29914200 | 3.86550700  | 0.08005700  |
| C | 3.84606800 | 2.75709300  | 2.11626900  |
| H | 2.62124100 | 1.00741300  | 1.87054900  |
| C | 3.34500400 | 4.59678400  | 0.64428200  |
| H | 1.69575500 | 4.28294500  | -0.71667600 |
| C | 4.12264700 | 4.04841900  | 1.66503200  |
| H | 4.44755100 | 2.31346500  | 2.90479200  |
| H | 3.55311100 | 5.59985400  | 0.28269800  |
| H | 4.93683700 | 4.61887500  | 2.10182100  |
| C | 3.29003600 | 0.38915200  | -1.06730500 |
| C | 3.80140100 | 0.12592200  | -2.46795300 |
| C | 3.27553100 | 1.48643300  | -2.09823500 |
| H | 4.05527800 | 0.48090600  | -0.29909000 |
| H | 3.18261900 | -0.49163100 | -3.11277800 |
| H | 4.86982200 | -0.01103200 | -2.60531800 |
| H | 3.97980300 | 2.30003700  | -1.95661200 |
| H | 2.30989000 | 1.78848700  | -2.48332600 |
| C | 3.51795600 | -3.81749100 | -0.43478200 |
| C | 3.30959600 | -2.45468900 | -0.23337100 |
| C | 2.18613400 | -1.80538700 | -0.77008800 |
| C | 1.30791100 | -2.56548800 | -1.55994700 |
| C | 1.52151400 | -3.93233500 | -1.77900800 |
| C | 2.62722400 | -4.56125700 | -1.21635300 |
| H | 4.38345100 | -4.29999000 | 0.00952400  |
| H | 4.02493900 | -1.88024200 | 0.34644300  |
| H | 0.82080600 | -4.48447200 | -2.39739600 |
| H | 2.79929300 | -5.61936400 | -1.38674900 |

## References

1. B. Ma, P. Wu, X. Wang, Z. Wang, H.-X. Lin and H.-X. Dai, *Angew. Chem., Int. Ed.*, 2019, **58**, 13335–13339.
2. S. K. Mandal, D. R. Jensen, J. S. Pugsley, M. S. Sigman, *J. Org. Chem.* 2003, **68**, 4600–4603
3. W. Yan, Q. Wang, Y. Chen, J. L. Petersen, X. Shi, *Org. Lett.* 2010, **12**, 3308–3311
4. V. J. Meyer, M. Niggemann, *Chem. Eur. J.* 2012, **18**, 4687–4691
5. Y. Hu, Y. Shen, S. Yu, L. Shan, Q. Sun, W. Zhang, *Syn Com.* 2013, **43**, 2817–2823
6. R. G. Parr, W. Yang, Oxford University Press: New York, 1989.
7. M. J. Frisch, G. W. Trucks, H. B. Schlegel, G. E. Scuseria, M. A. Robb, J. R. Cheeseman, G.

- Scalmani, V. Barone, B. Mennucci, G. A. Petersson, H. Nakatsuji, M. Caricato, X. Li, H. P. Hratchian, A. F. Izmaylov, J. Bloino, G. Zheng, J. L. Sonnenberg, M. Hada, M. Ehara, K. Toyota, R. Fukuda, J. Hasegawa, M. Ishida, T. Nakajima, Y. Honda, O. Kitao, H. Nakai, T. Vreven, J. A. Montgomery, Jr., J. E. Peralta, F. Ogliaro, M. Bearpark, J. J. Heyd, E. Brothers, K. N. Kudin, V. N. Staroverov, T. Keith, R. Kobayashi, J. Normand, K. Raghavachari, A. Rendell, J. C. Burant, S. S. Iyengar, J. Tomasi, M. Cossi, N. Rega, J. M. Millam, M. Klene, J. E. Knox, J. B. Cross, V. Bakken, C. Adamo, J. Jaramillo, R. Gomperts, R. E. Stratmann, O. Yazyev, A. J. Austin, R. Cammi, C. Pomelli, J. W. Ochterski, R. L. Martin, K. Morokuma, V. G. Zakrzewski, G. A. Voth, P. Salvador, J. J. Dannenberg, S. Dapprich, A. D. Daniels, O. Farkas, J. B. Foresman, J. V. Ortiz, J. Cioslowski and D. J. Fox, Gaussian 09, Revision E.01, Gaussian, Inc.: Wallingford CT, 2013.
8. (a) C. Lee, W. Yang, R. G. Parr, *Phys. Rev. B: Condens. Matter Mater. Phys.* 1988, **37**, 785. (b) A. D. Becke, *J. Chem. Phys.* 1993, **98**, 5648.
9. S. Grimme, J. Antony, S. Ehrlich, H. Krieg, *J. Chem. Phys.* 2010, **132**, 154104.
10. D. Andrae, U. Häußermann, M. Dolg, H. Stoll, H. Preuß, *Theor. Chim. Acta* 1990, **77**, 123.
11. R. Ditchfield, W. J. Hehre, J. A. Pople, *J. Chem. Phys.* 1971, **54**, 724-728.
12. (a) C. Gonzalez, H. B. Schlegel, *J. Chem. Phys.* 1989, **90**, 2154. (b) C. Gonzalez, H. B. Schlegel, *J. Phys. Chem.* 1990, **94**, 5523.
13. A. V. Marenich, C. J. Cramer, D. G. Truhlar, *J. Phys. Chem. B* 2009, **113**, 6378.
14. Y. Zhao, D. G. Truhlar, *J. Chem. Phys.* 2006, **125**, 194101.
15. C. Y. Legault, CYLView, 1.0b; UniversitédeSherbrooke: Québec, Montreal, Canada, 2009; <http://www.cylview.org>.
16. T. Lu, F. Chen, *J. Comput. Chem.* 2012, **33**, 580-592.
17. T. Lu, Q. Chen, *J. Comput. Chem.* 2022, **43**, 539-555.
18. W. Humphrey, A. Dalke, K. Schulten, *J. Mol. Graphics* 1996, **14**, 33-38.

## Copies of $^1\text{H}$ , $^{13}\text{C}$ NMR and $^{19}\text{F}$ NMR spectra

### 2-(naphthalen-2-yl)-N-(pivaloyloxy)acrylamide (1zb)

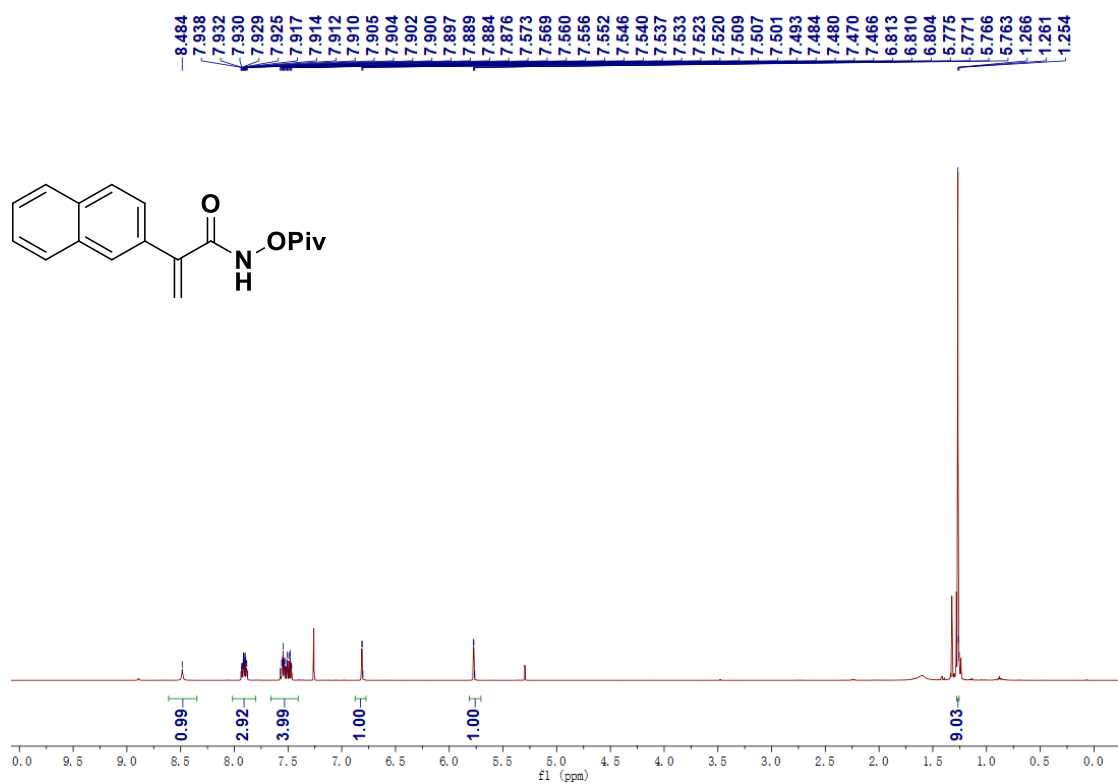

### 3-cyclopropyl-1-(4-iodophenyl)prop-2-yn-1-ol (2h)

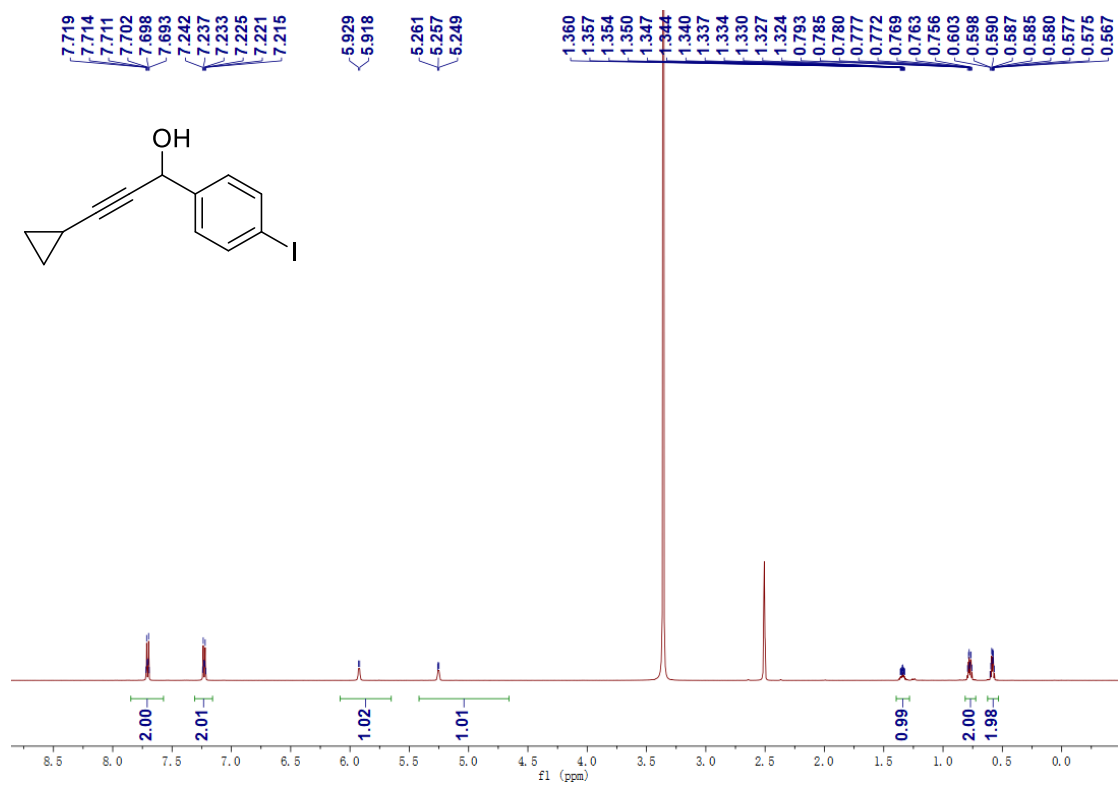

### 4-(3-cyclopropyl-1-hydroxyprop-2-yn-1-yl)benzonitrile (2i)

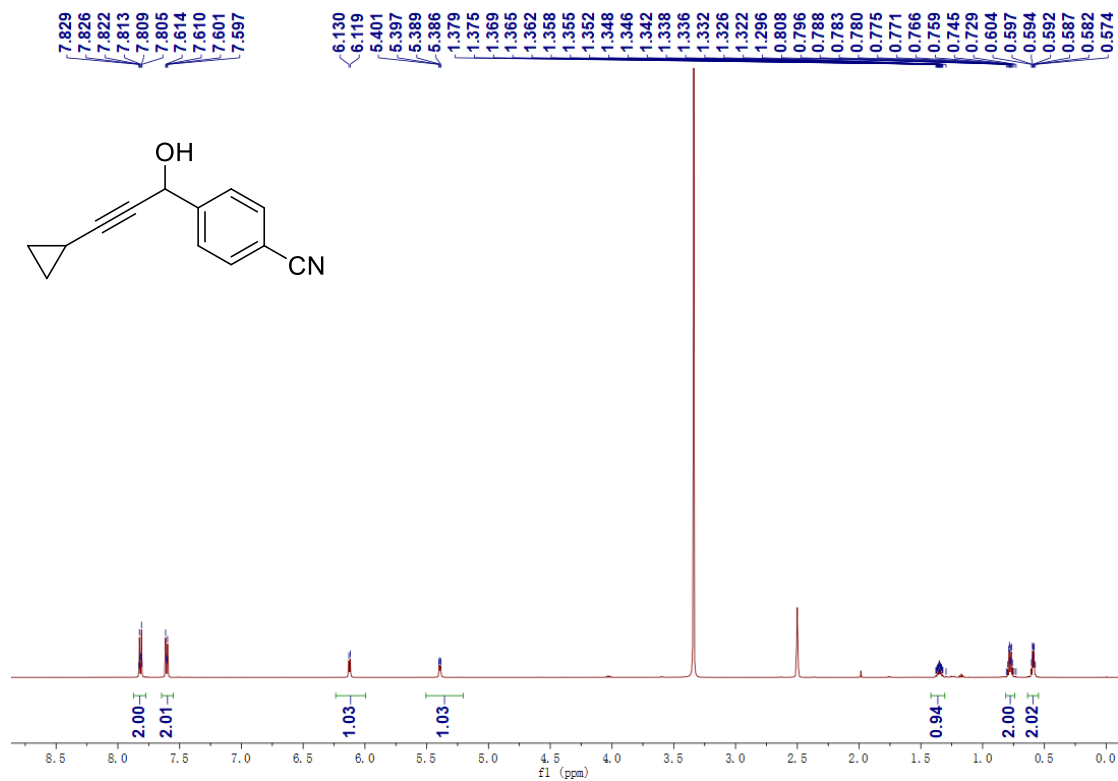

### 3-cyclopropyl-1-(4-(trifluoromethyl)phenyl)prop-2-yn-1-ol (2j)

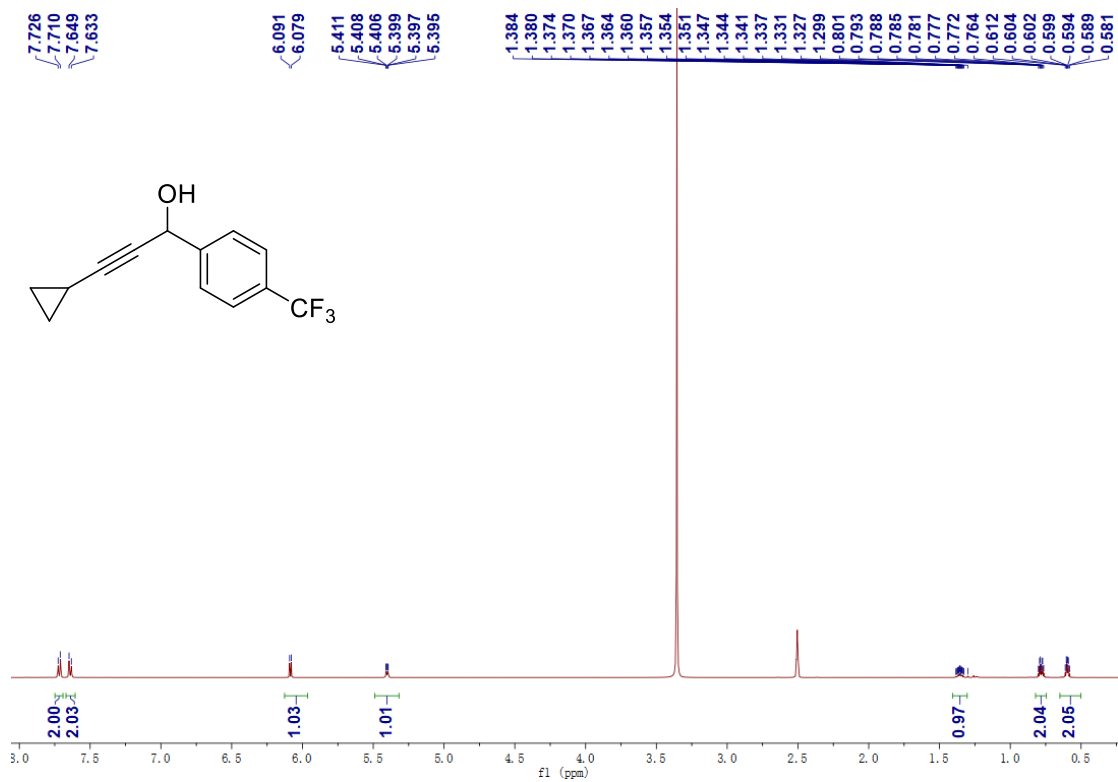

**3-cyclopropyl-1-(4-nitrophenyl)prop-2-yn-1-ol (2k)**

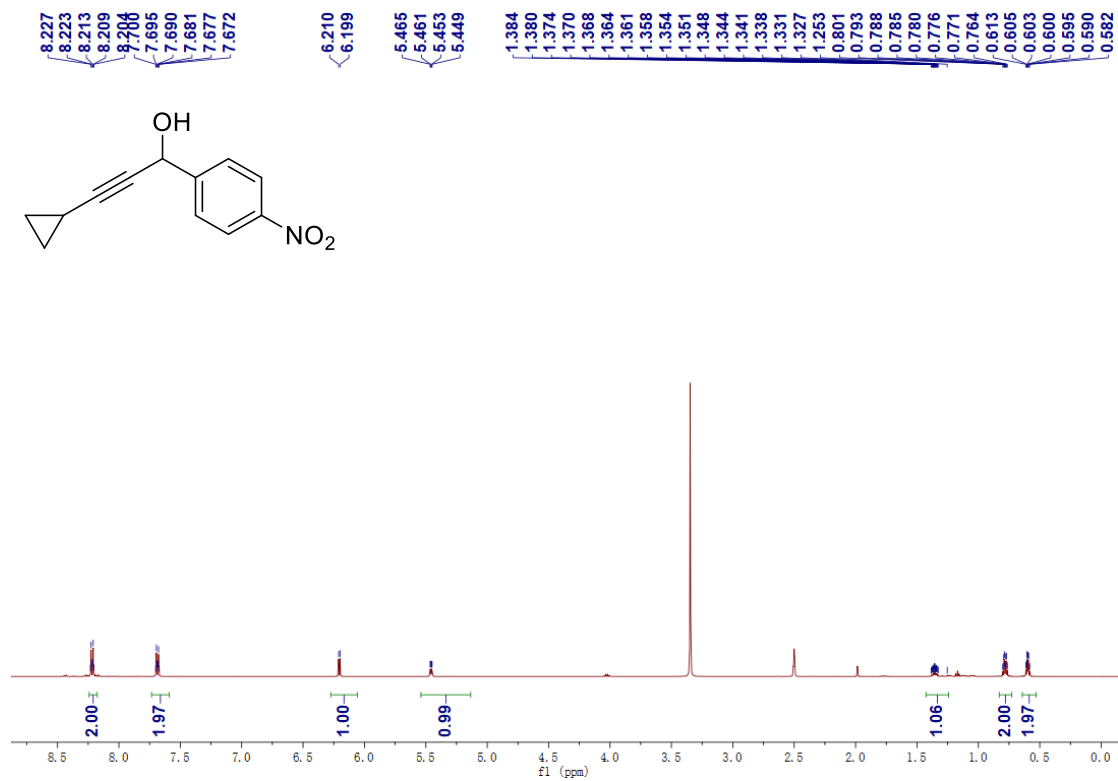

**3-cyclopropyl-1-(3-methoxyphenyl)prop-2-yn-1-ol (2l)**

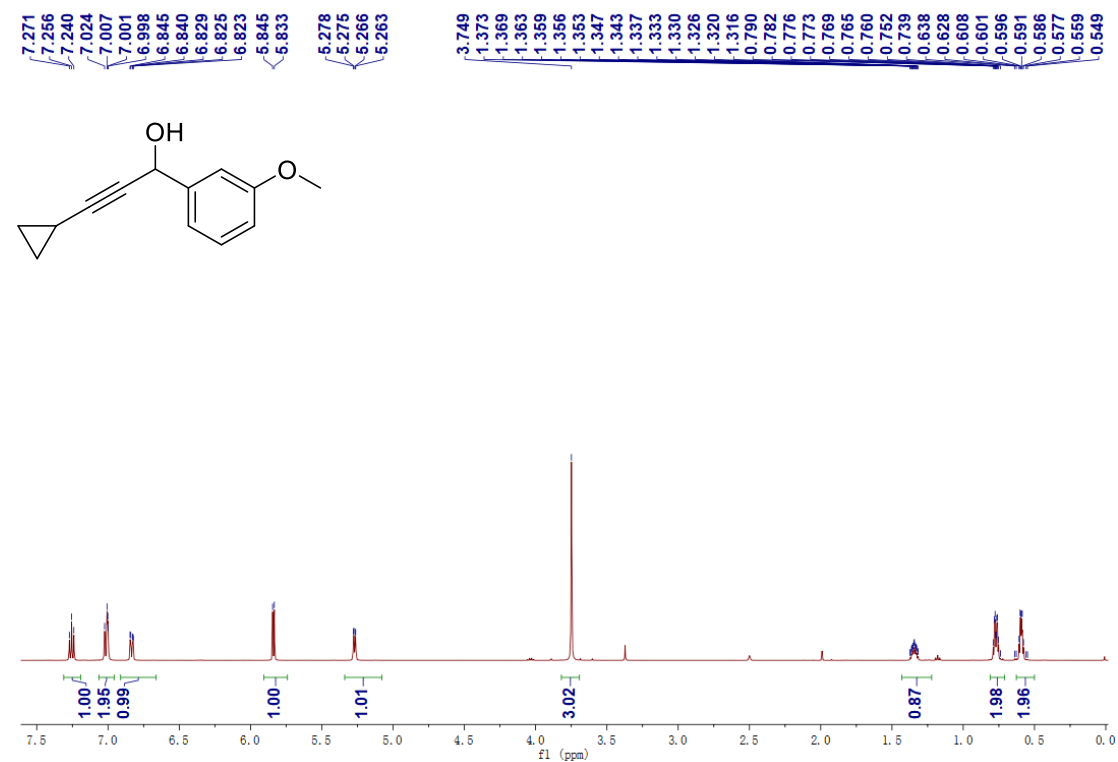

**tert-butyl 4-(3-cyclopropyl-1-hydroxyprop-2-yn-1-yl)piperidine-1-carboxylate (2n)**

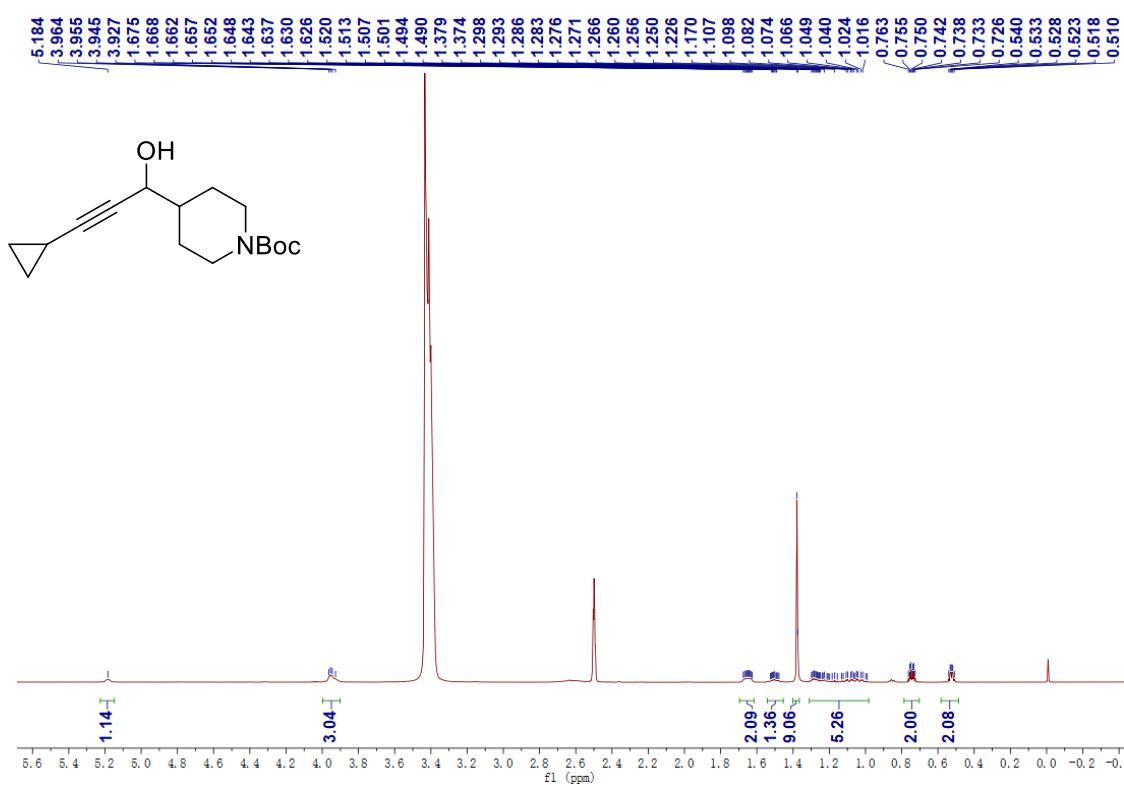

**1-(cyclopropylethynyl)cyclopentan-1-ol (2t)**

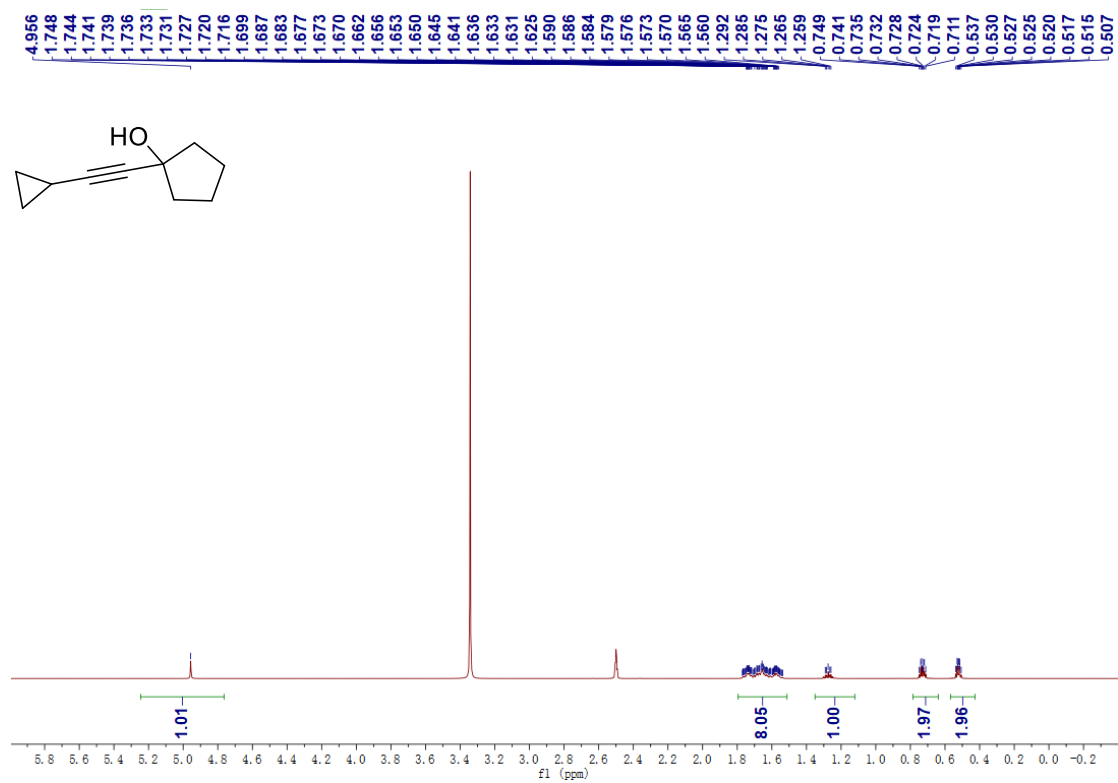

4-cyclopropyl-3-(hydroxy(phenyl)methyl)-6-phenylpyridin-2(1H)-one (3a)

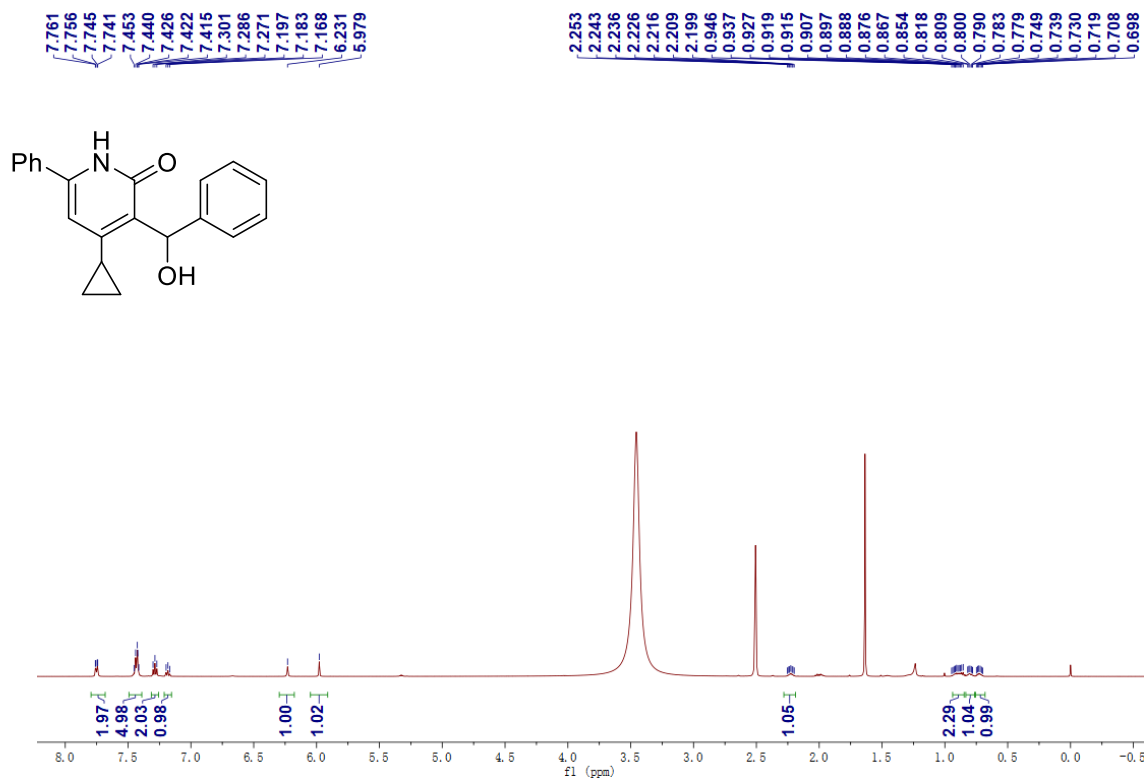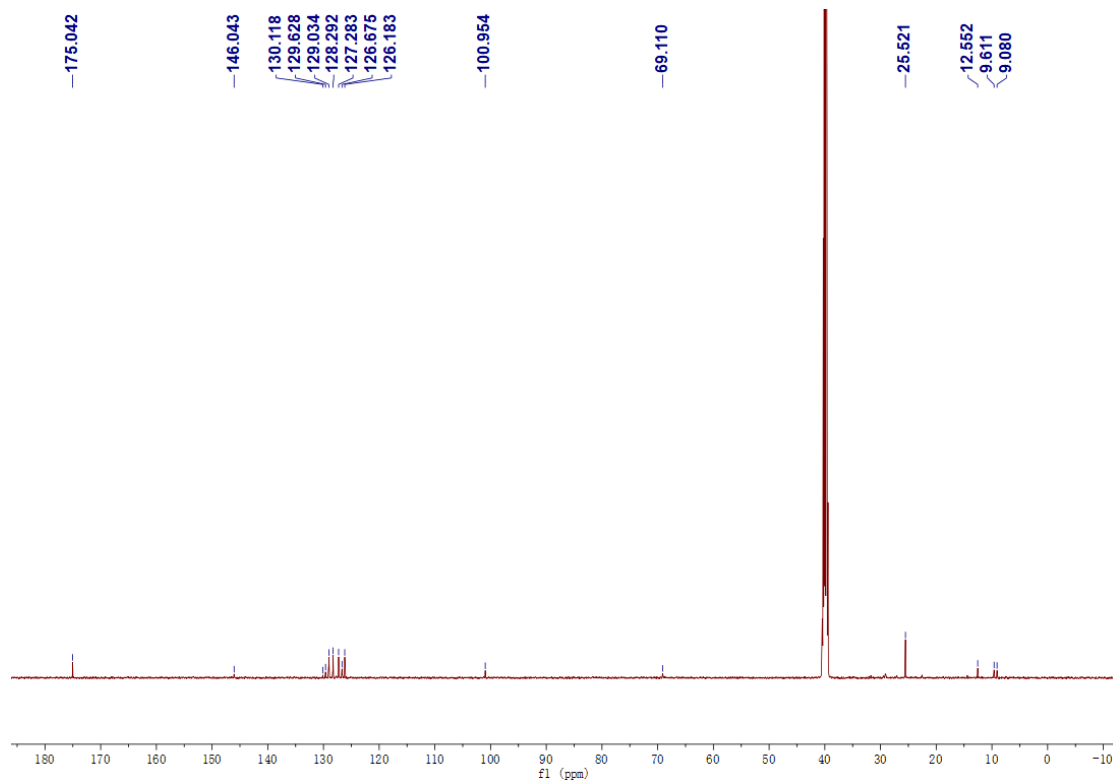



### 4-cyclopropyl-3-(hydroxy(p-tolyl)methyl)-6-phenylpyridin-2(1H)-one (3b)

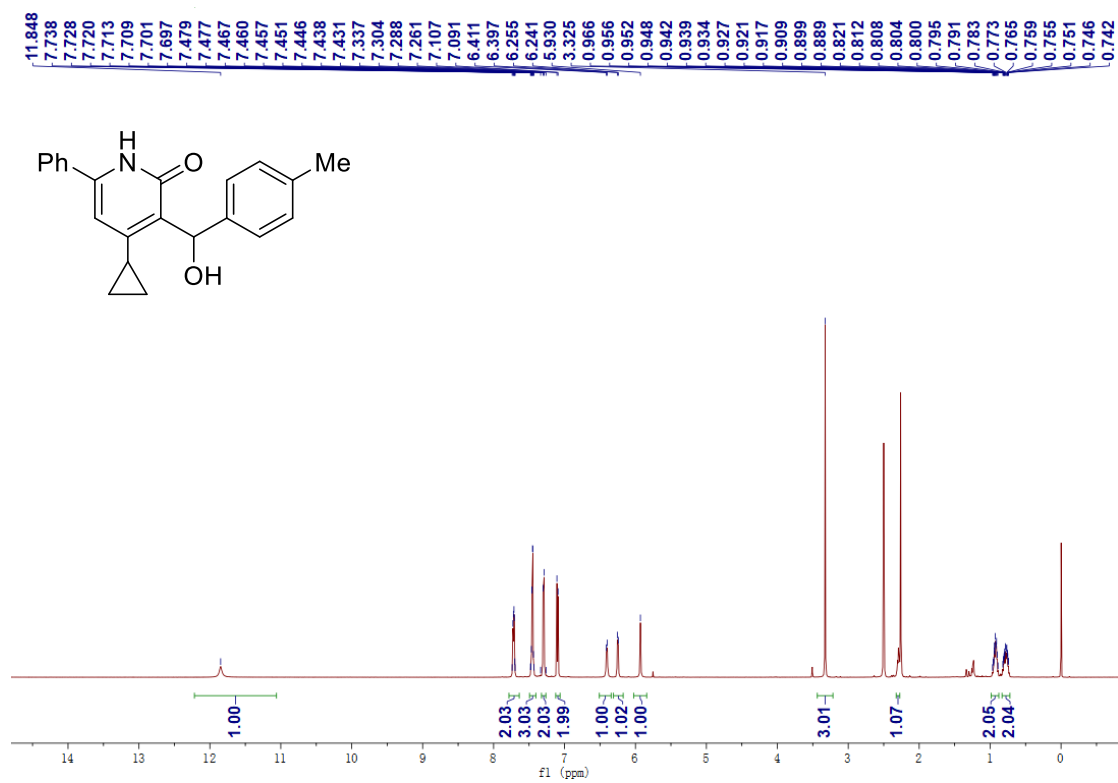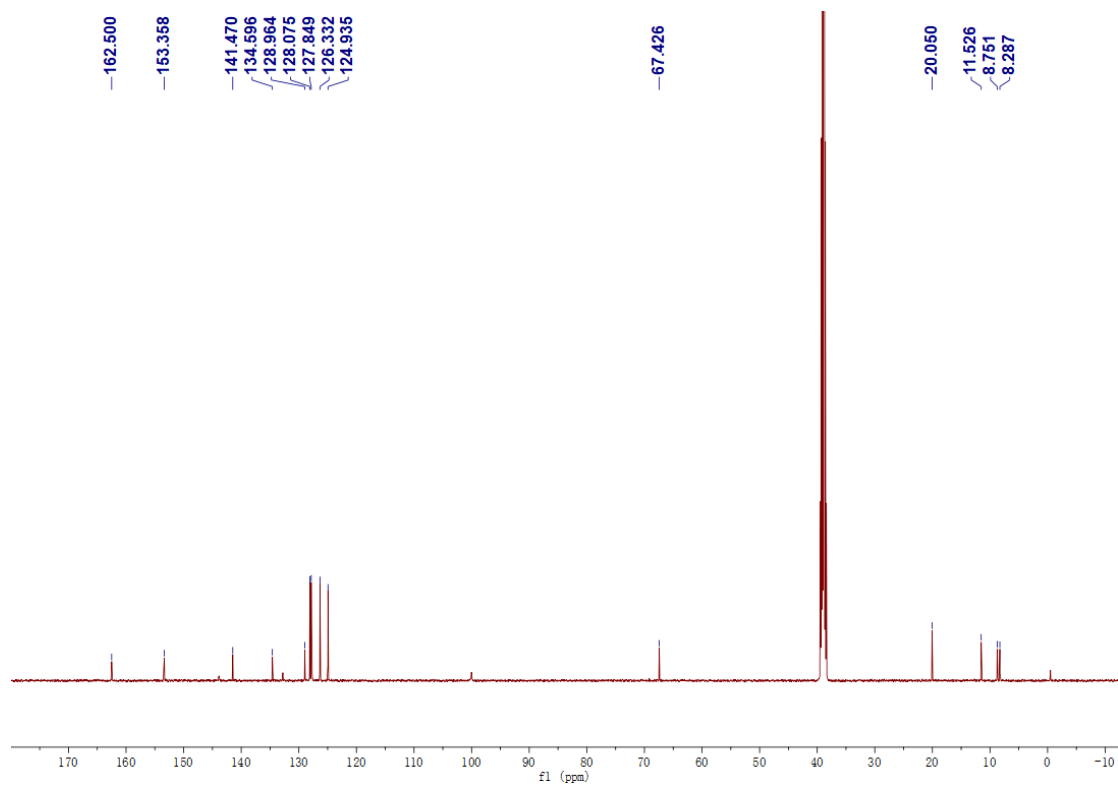

4-cyclopropyl-3-(hydroxy(4-methoxyphenyl)methyl)-6-phenylpyridin-2(1H)-one (3c)

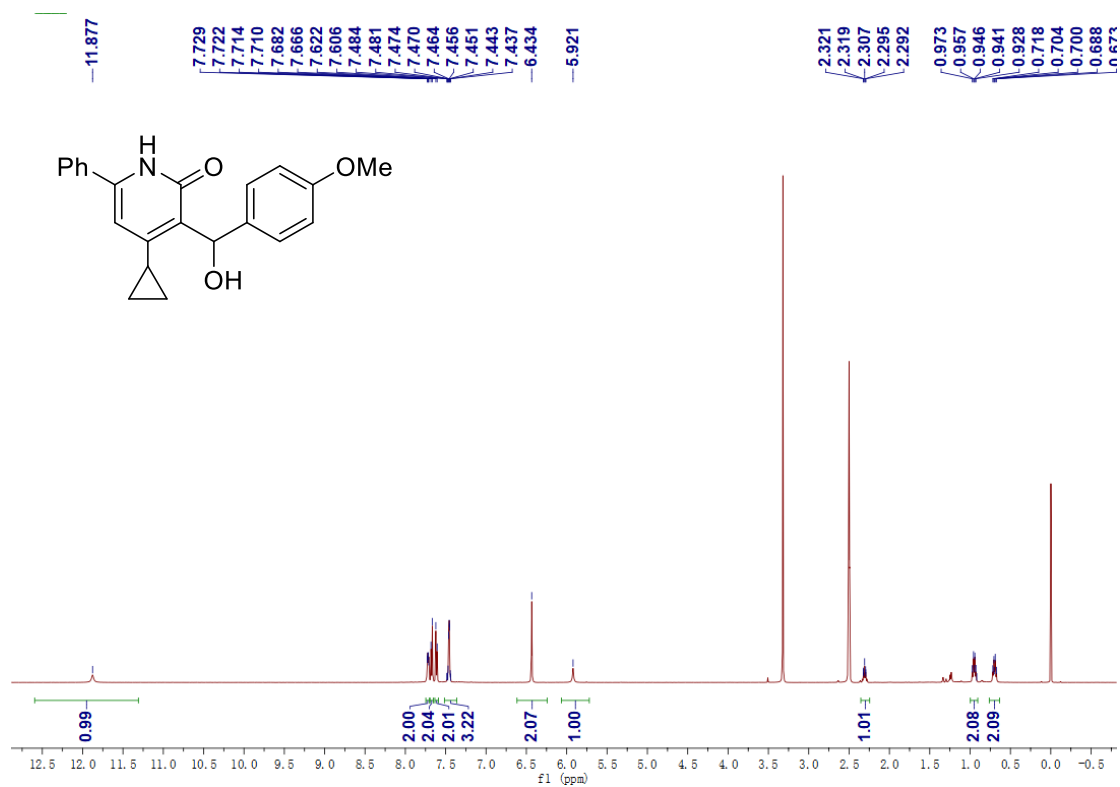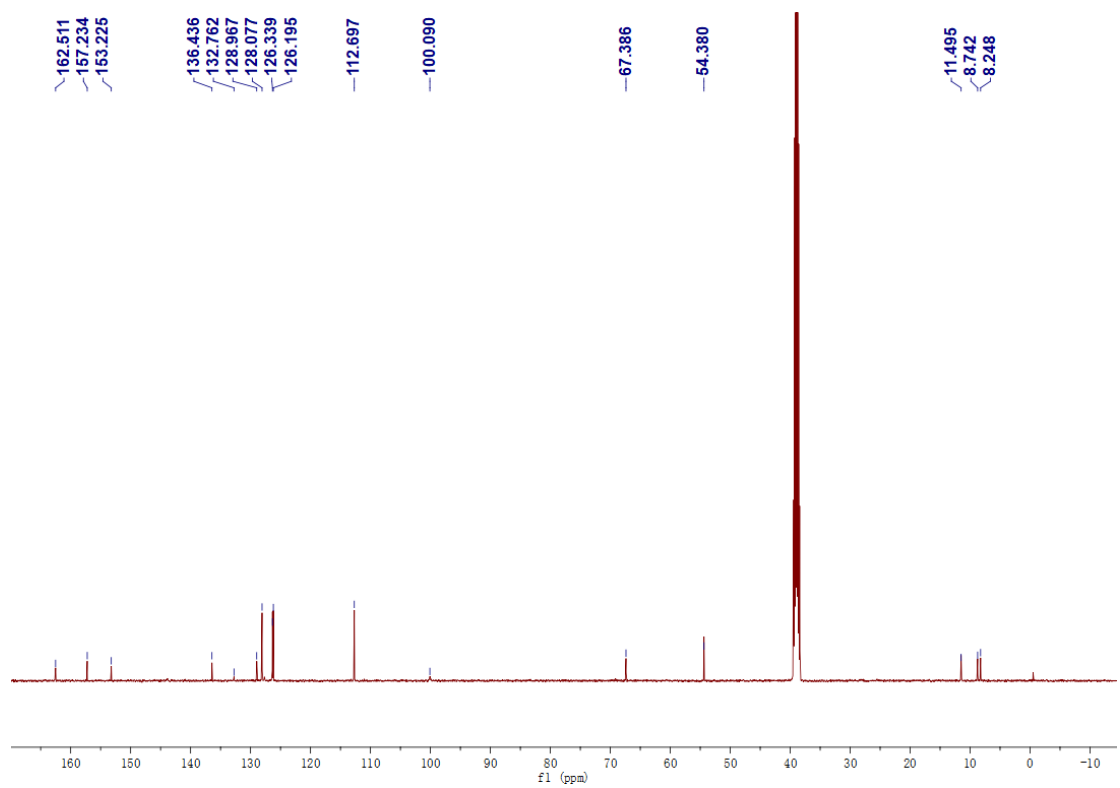

3-((4-(tert-butyl)phenyl)(hydroxy)methyl)-4-cyclopropyl-6-phenylpyridin-2(1H)-one (3d)

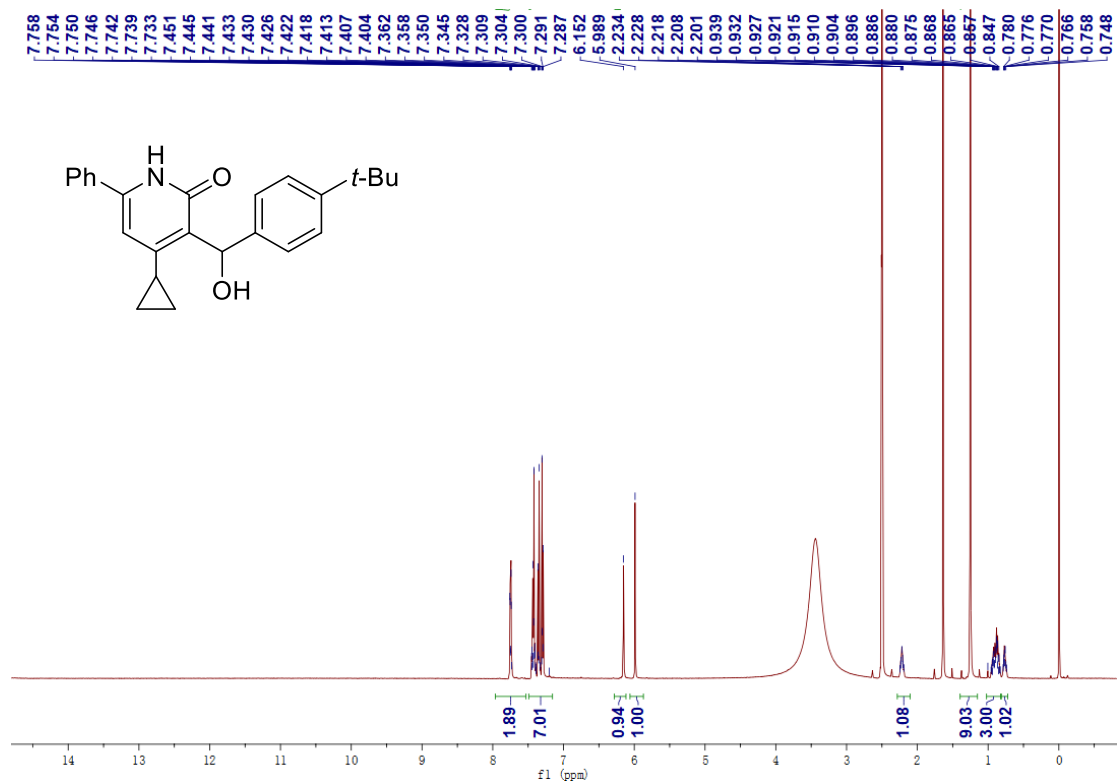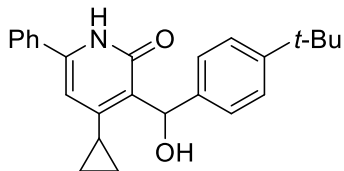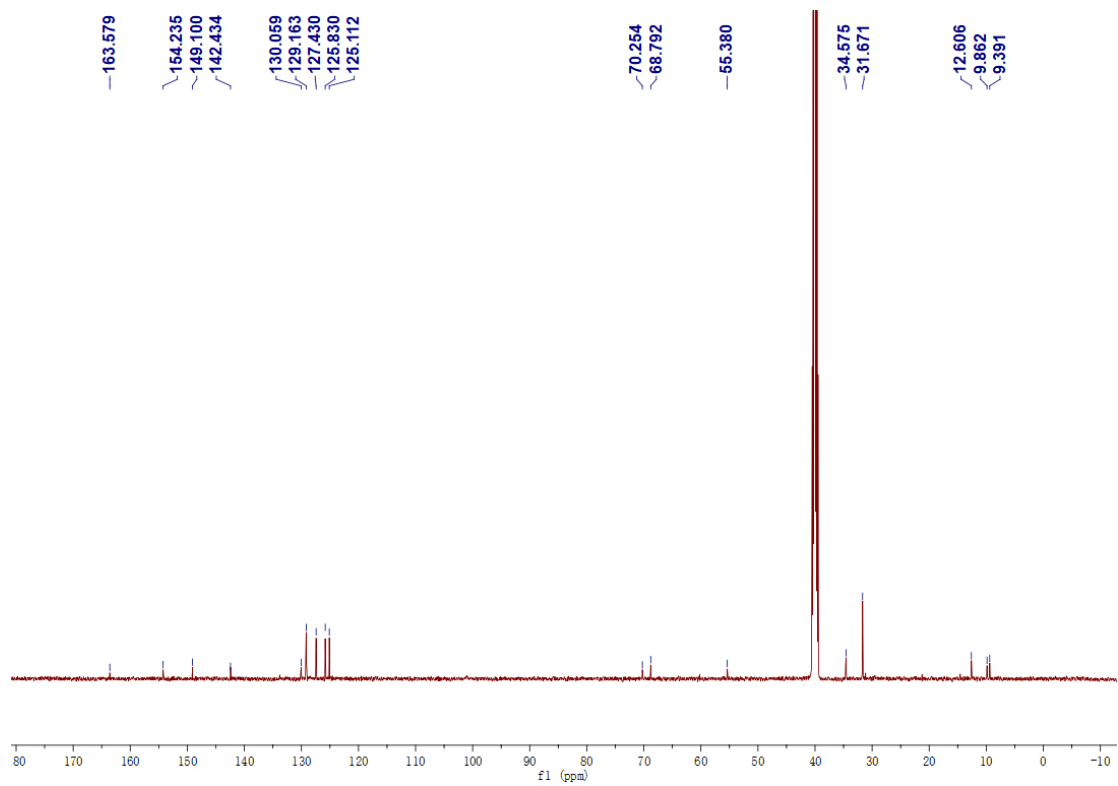

**3-cyclopropyl-3-((4-fluorophenyl)(hydroxy)methyl)-6-phenylpyridin-2(1H)-one (3e)**

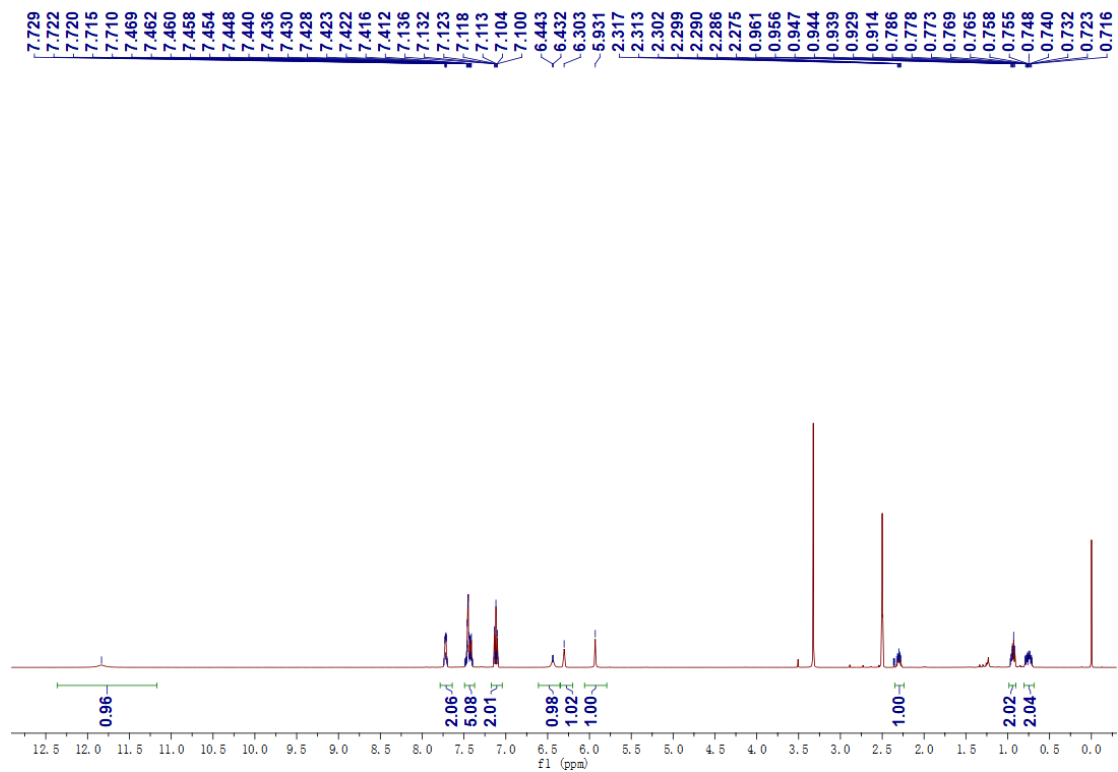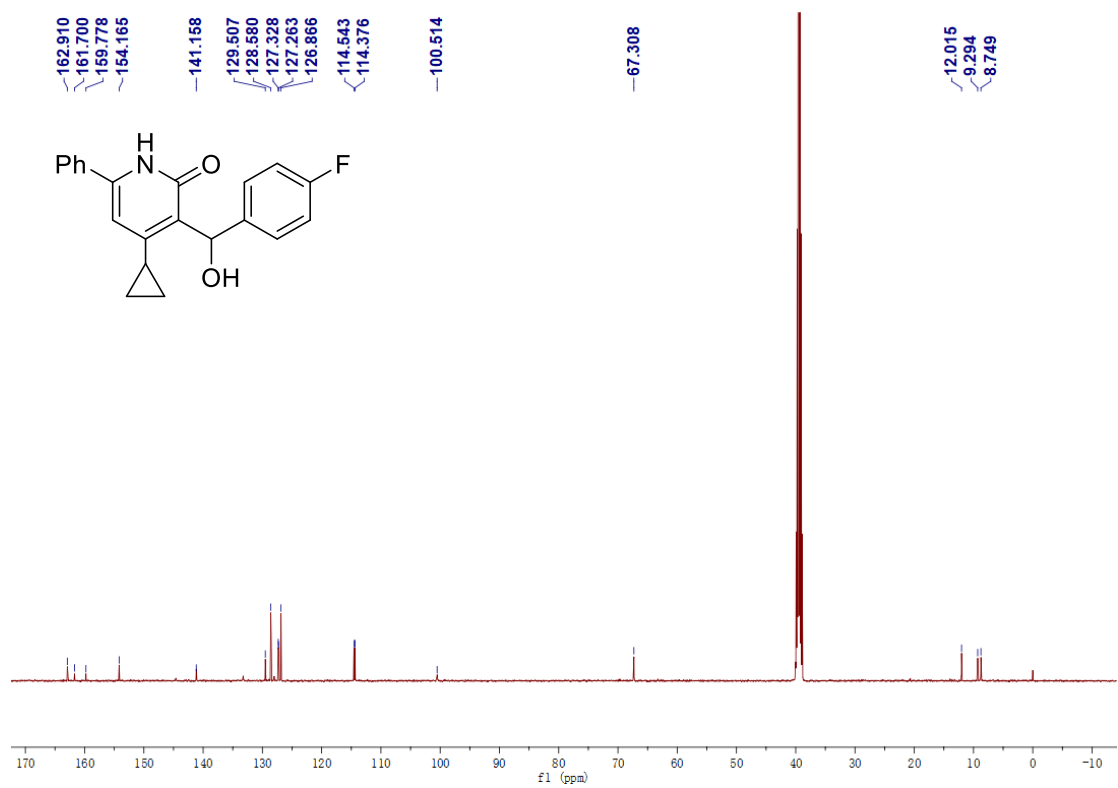

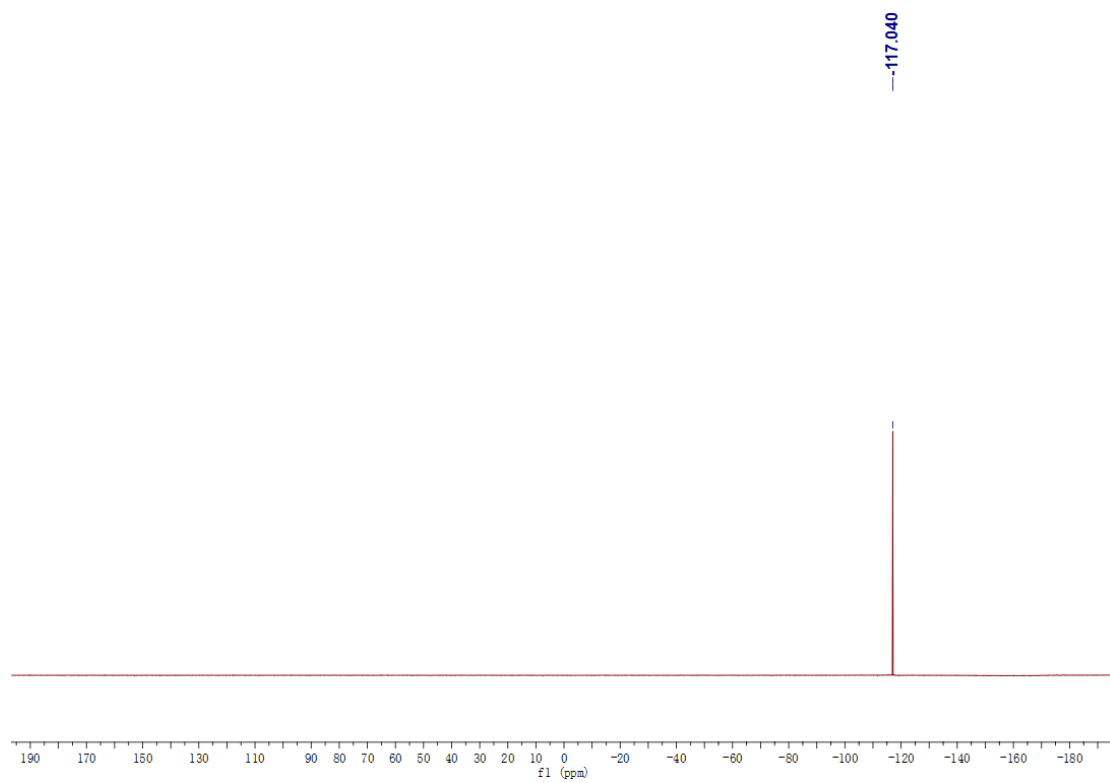

3-((4-chlorophenyl)(hydroxy)methyl)-4-cyclopropyl-6-phenylpyridin-2(1H)-one (3f)

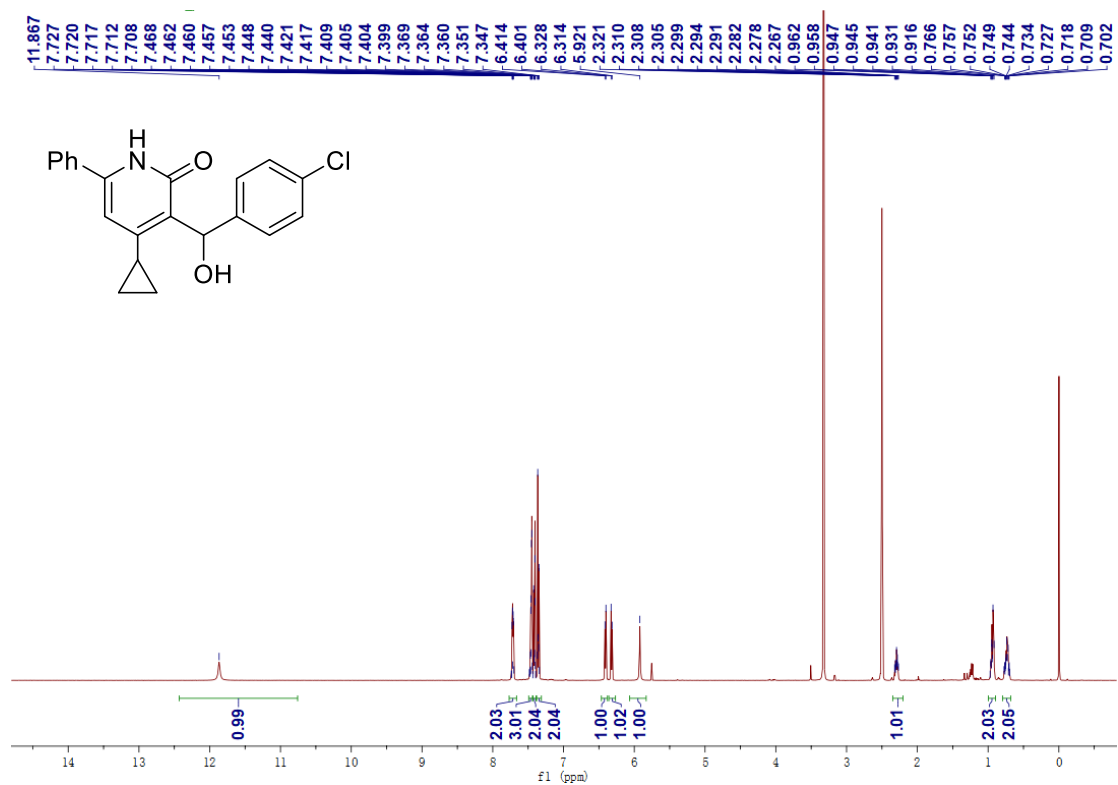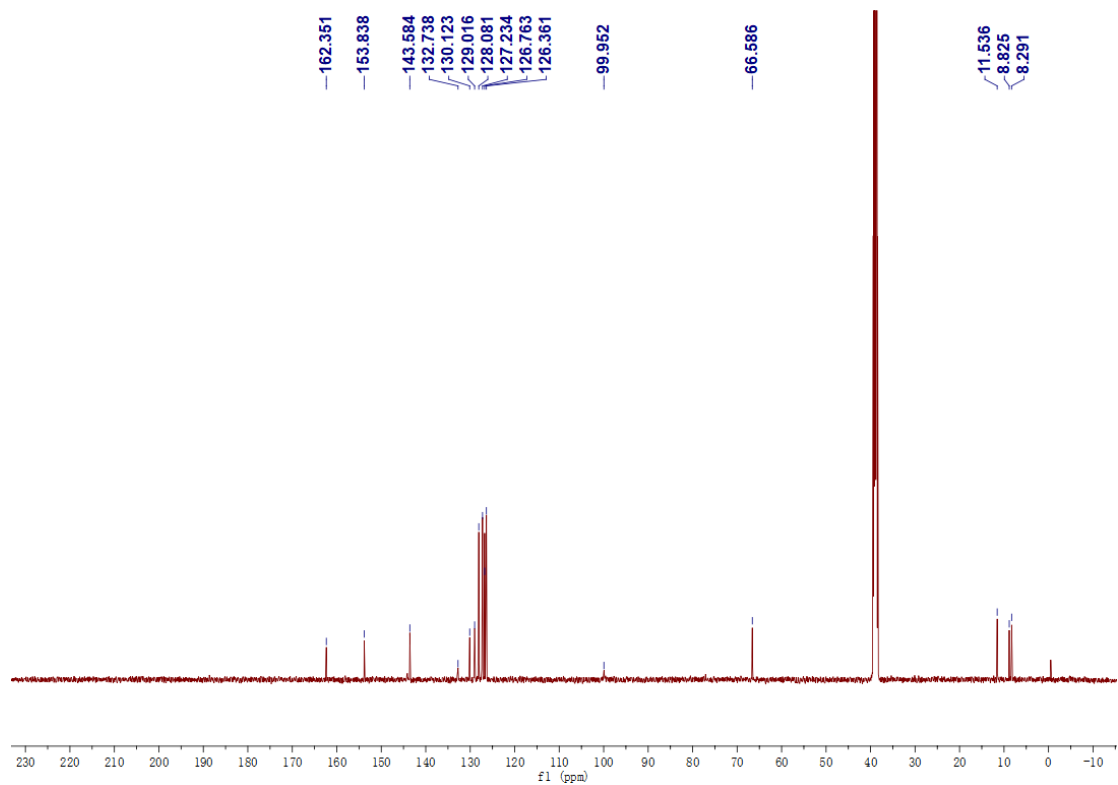

3-((4-bromophenyl)(hydroxy)methyl)-4-cyclopropyl-6-phenylpyridin-2(1H)-one (3g)

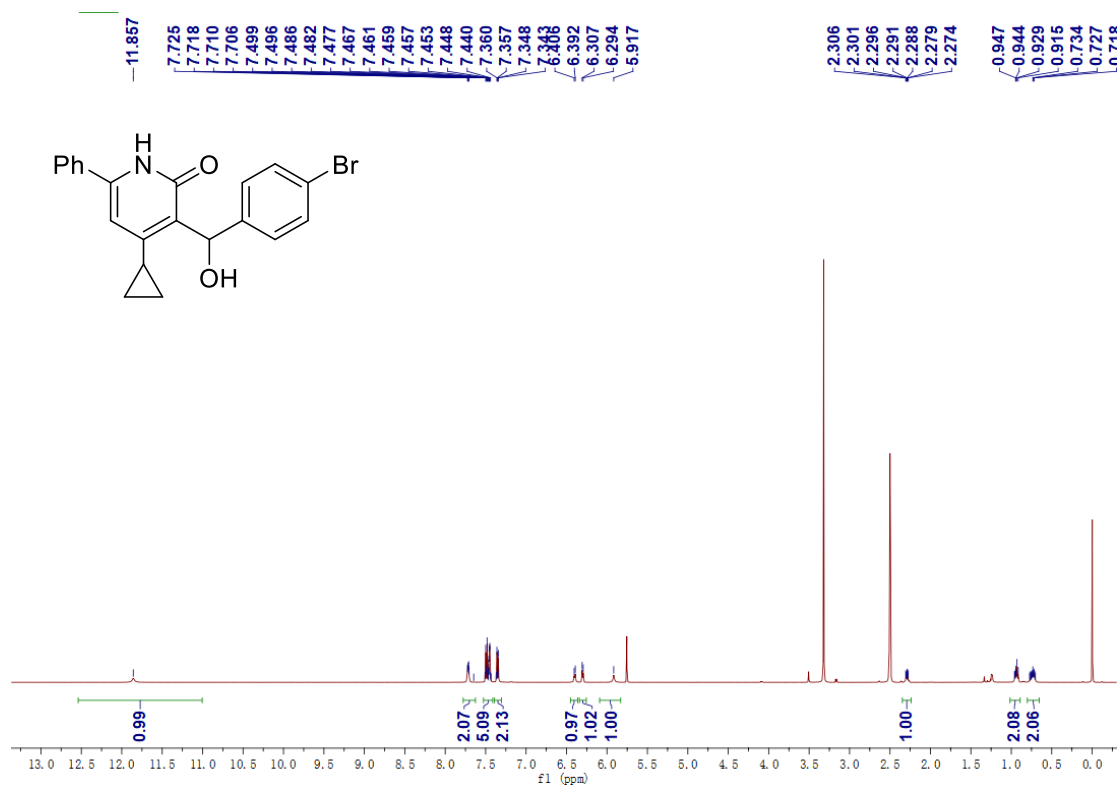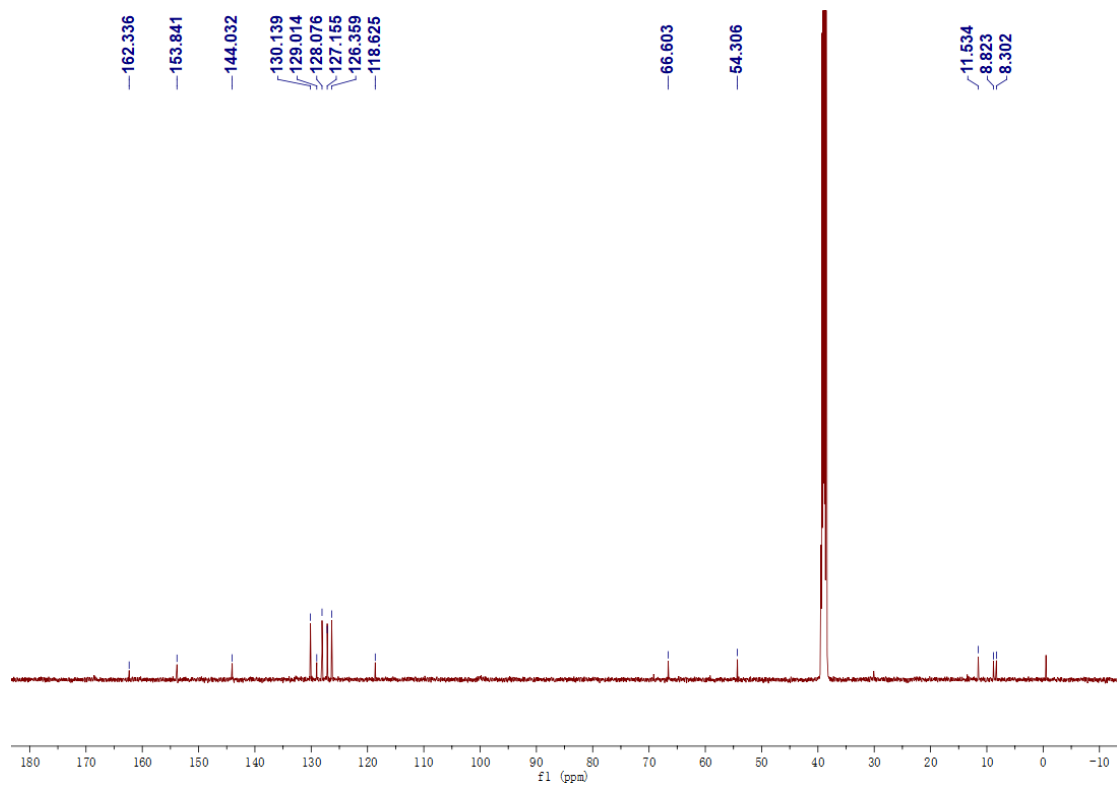

**3-cyclopropyl-3-(hydroxy(4-iodophenyl)methyl)-6-phenylpyridin-2(1H)-one (3h)**

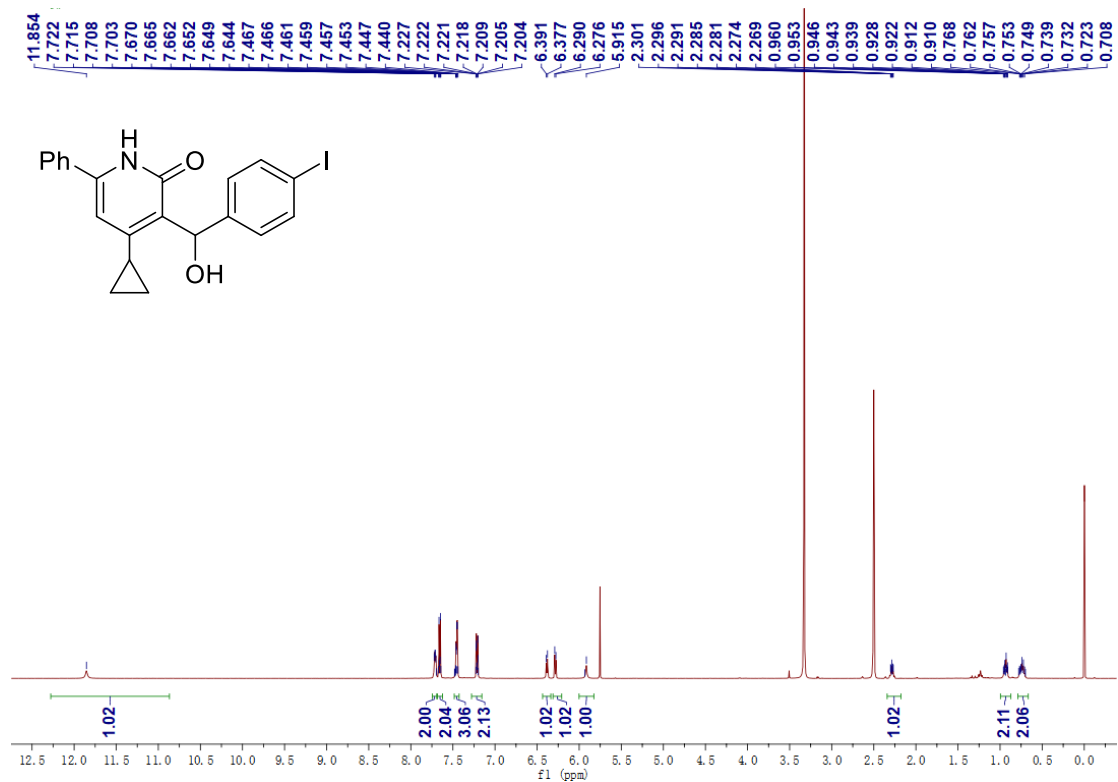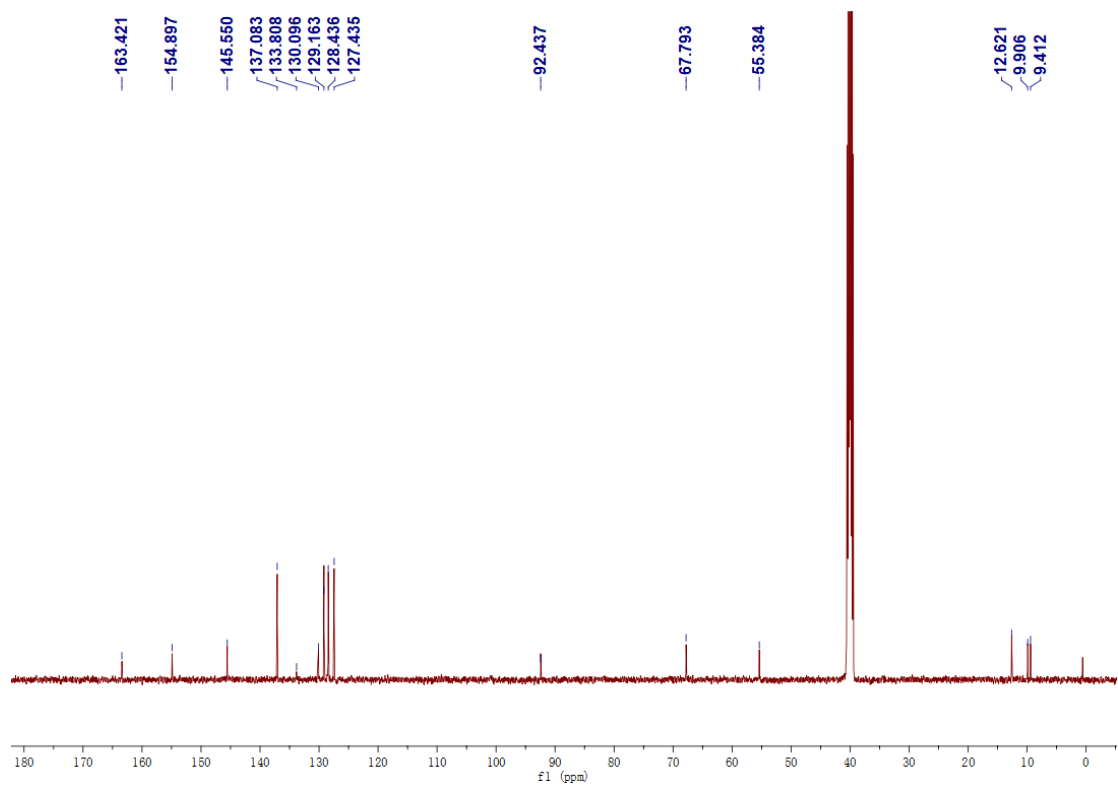



4-((4-cyclopropyl-2-oxo-6-phenyl-1,2-dihydropyridin-3-yl)(hydroxy)methyl)benzonitrile (3i)

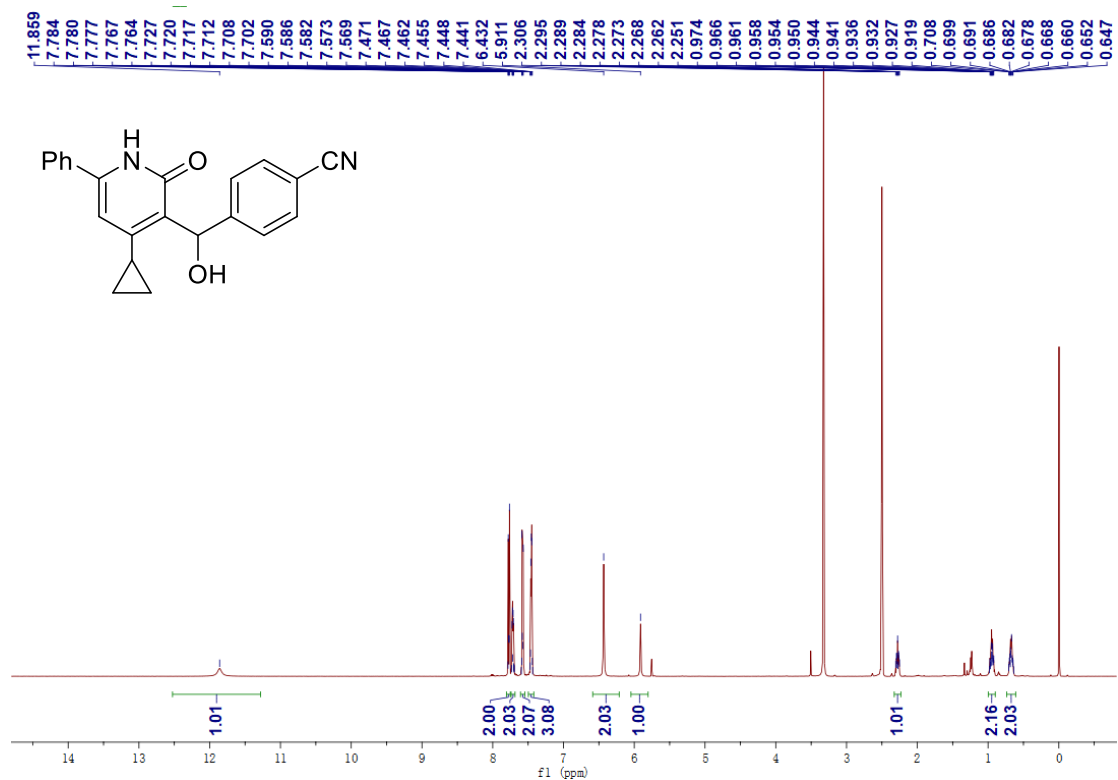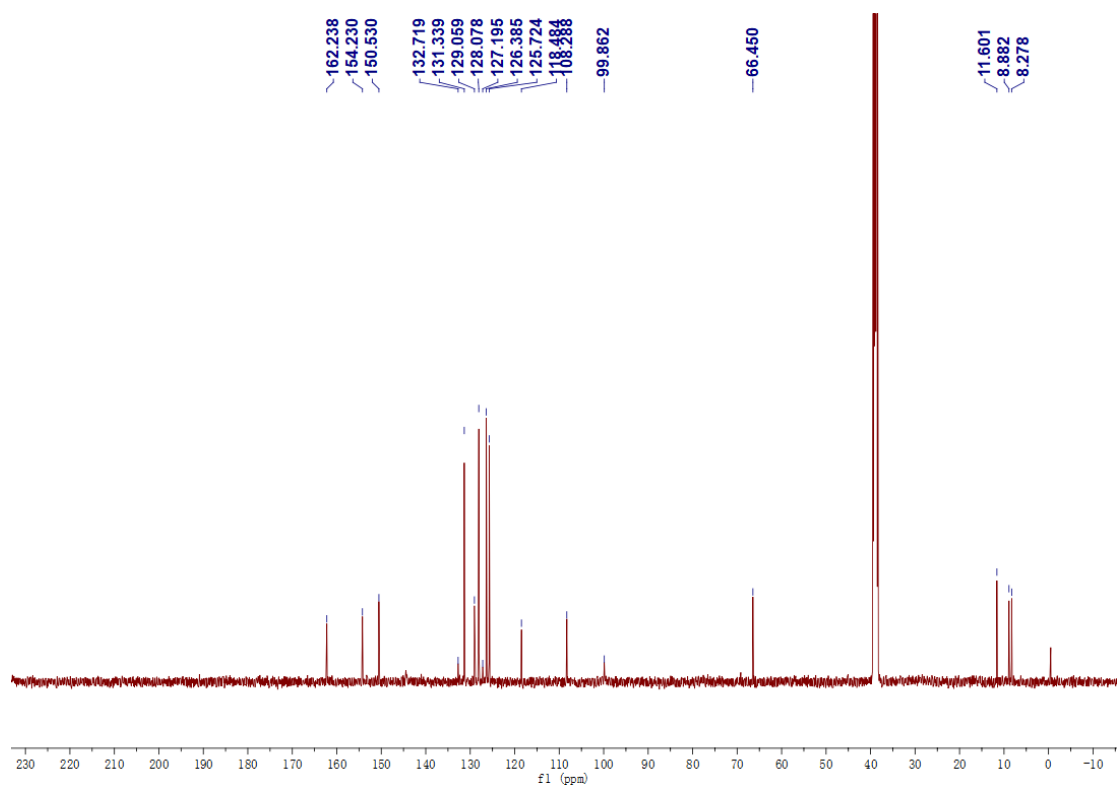

4-cyclopropyl-3-(hydroxy(4-(trifluoromethyl)phenyl)methyl)-6-phenylpyridin-2(1H)-one

(3j)

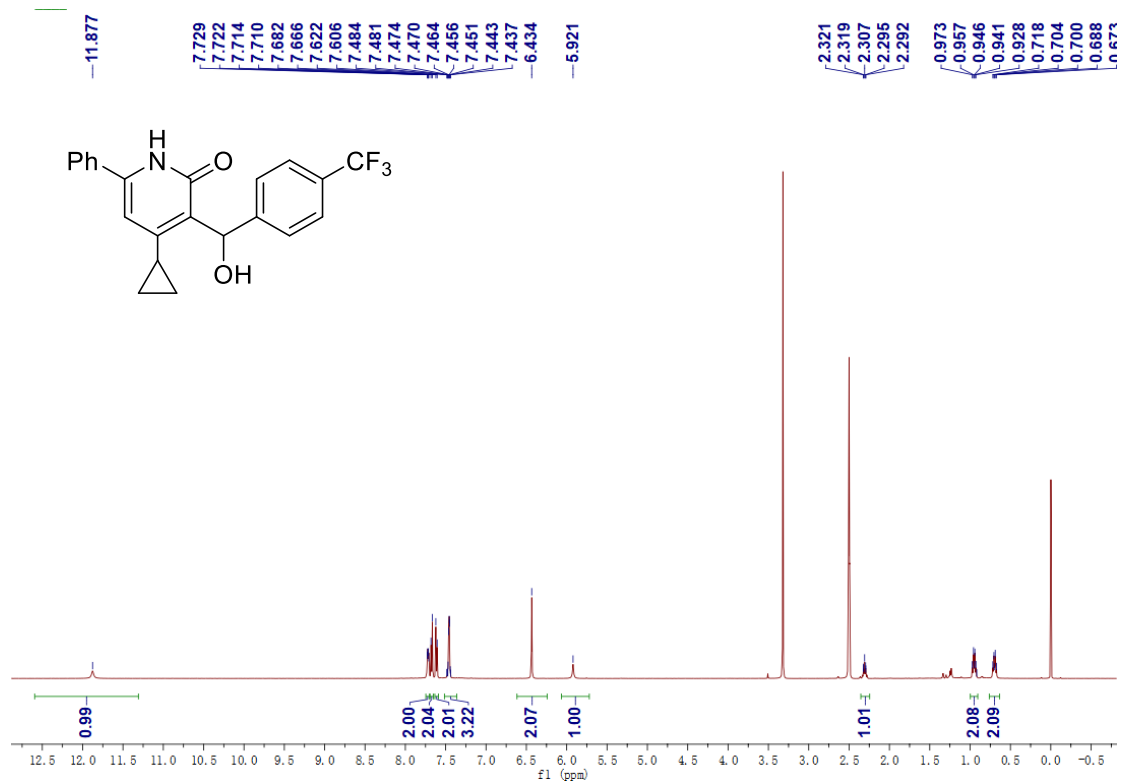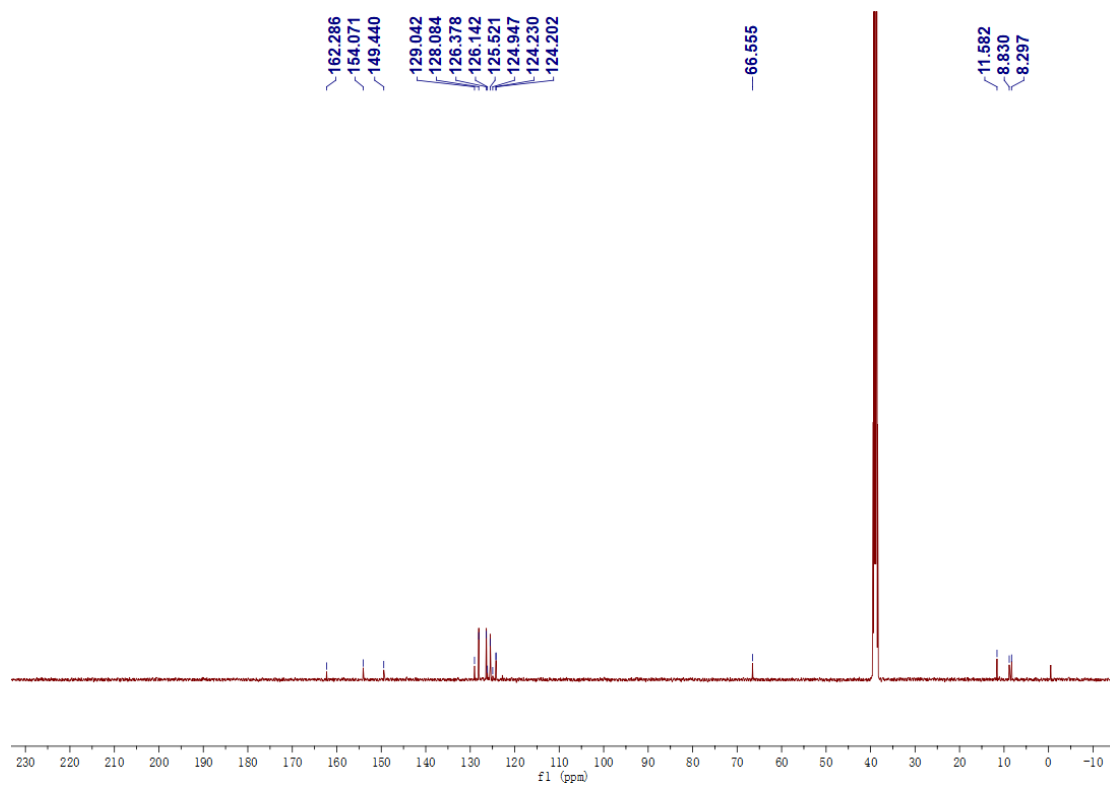

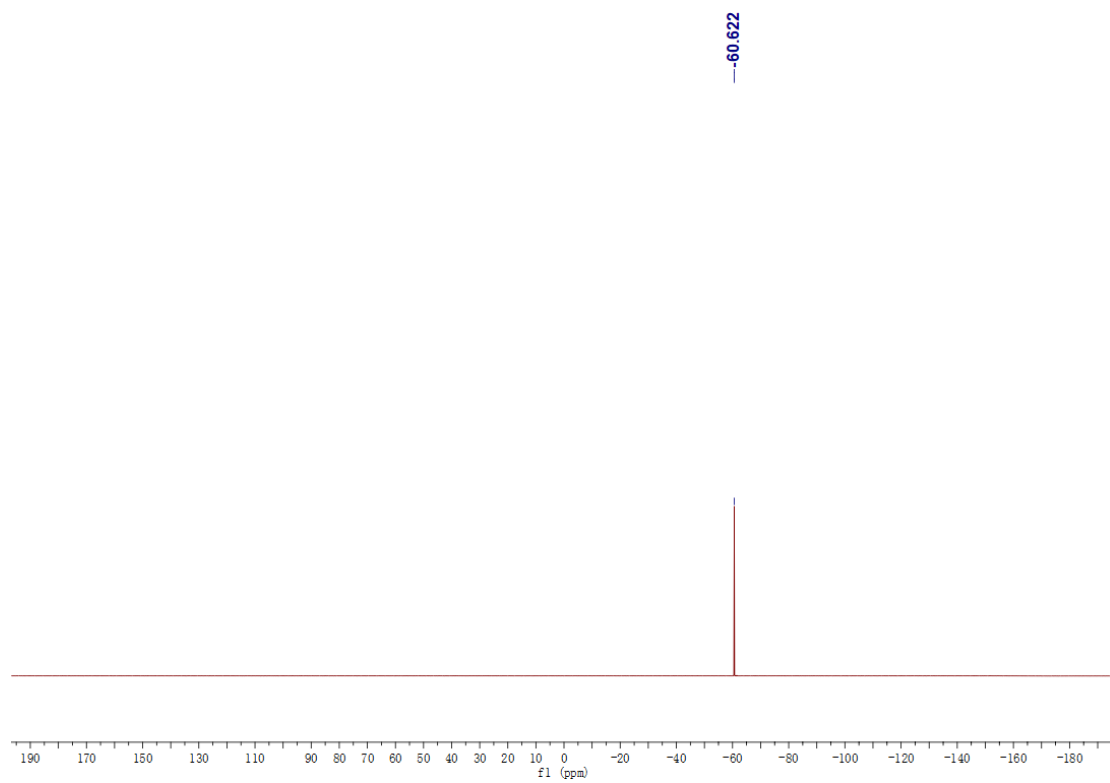

4-cyclopropyl-3-(hydroxy(4-nitrophenyl)methyl)-6-phenylpyridin-2(1H)-one (3k)

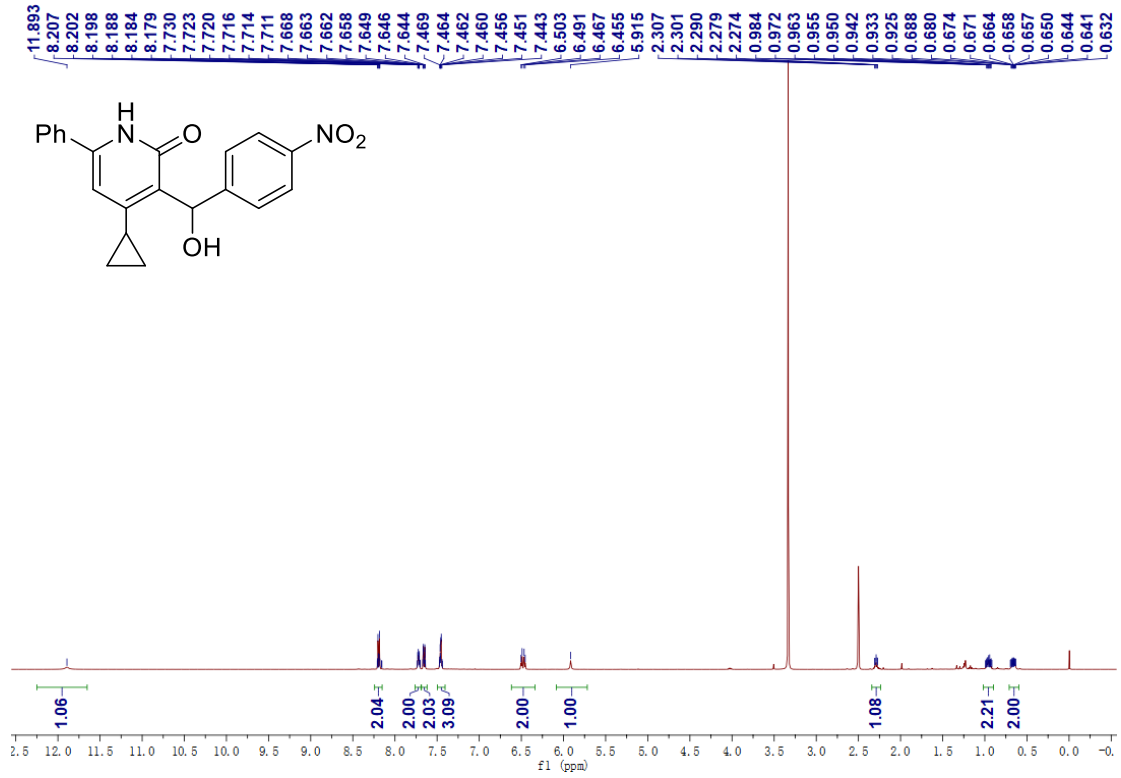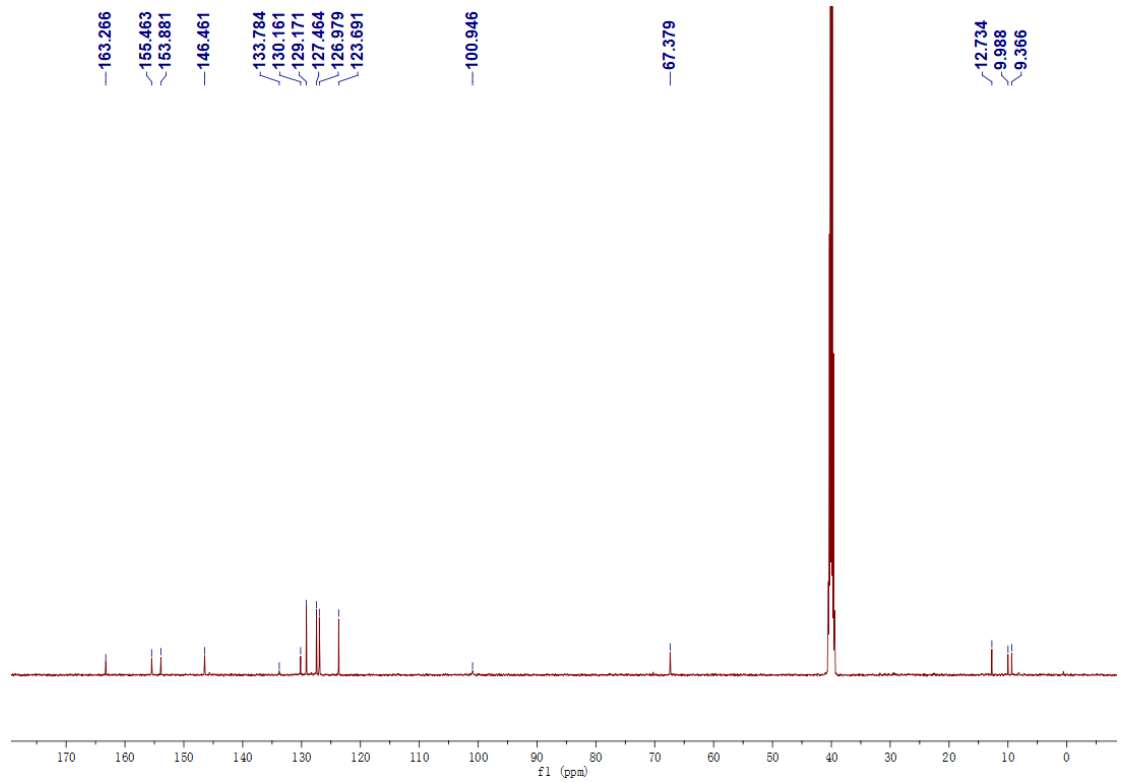

4-cyclopropyl-3-(hydroxy(3-methoxyphenyl)methyl)-6-phenylpyridin-2(1H)-one (3l)

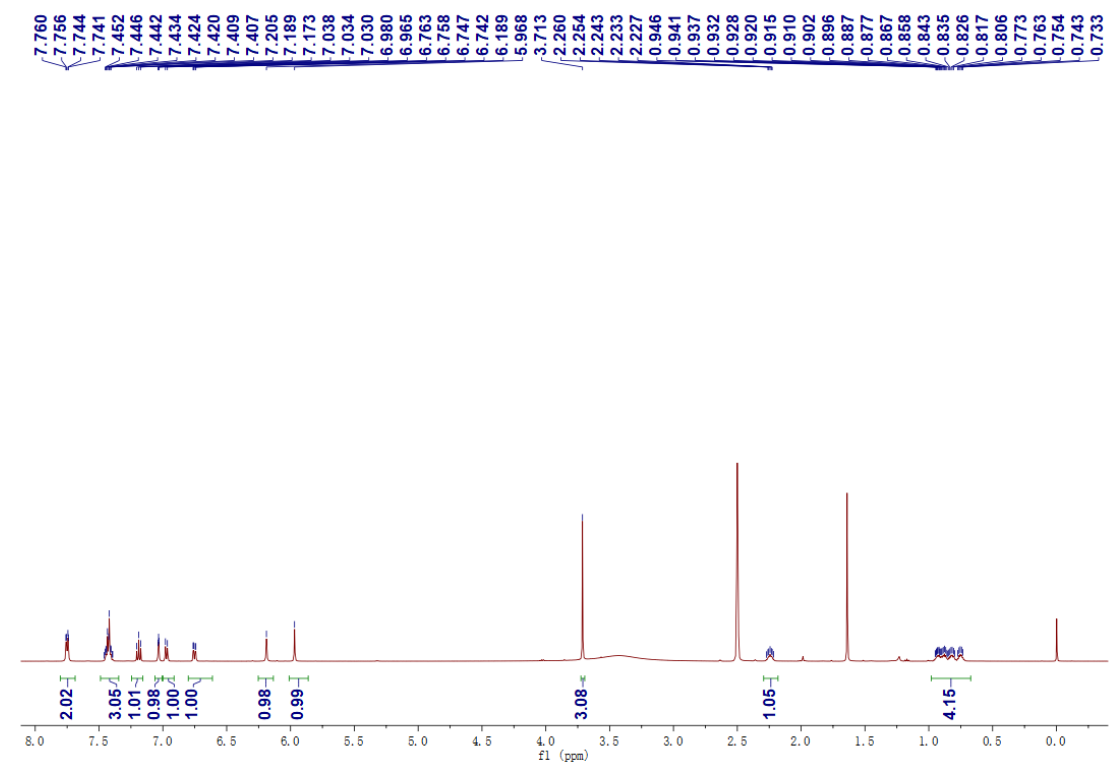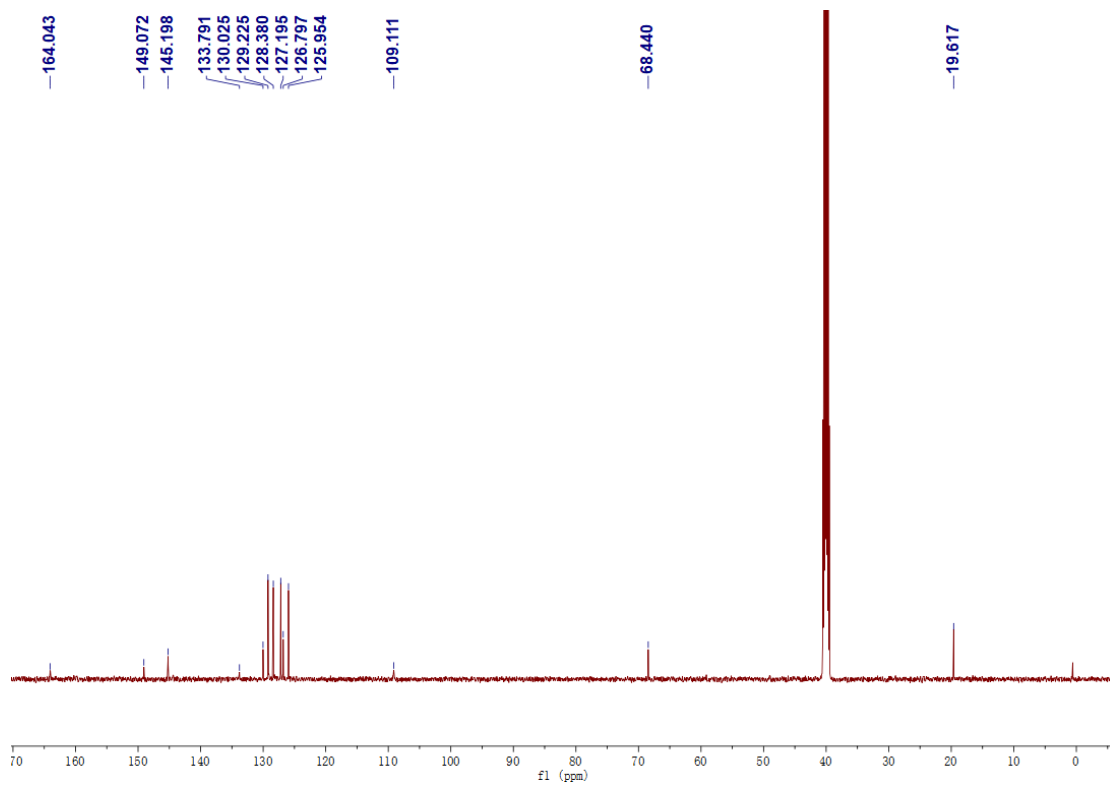

**3-(cyclohexyl(hydroxy)methyl)-4-cyclopropyl-6-phenylpyridin-2(1H)-one (3m)**

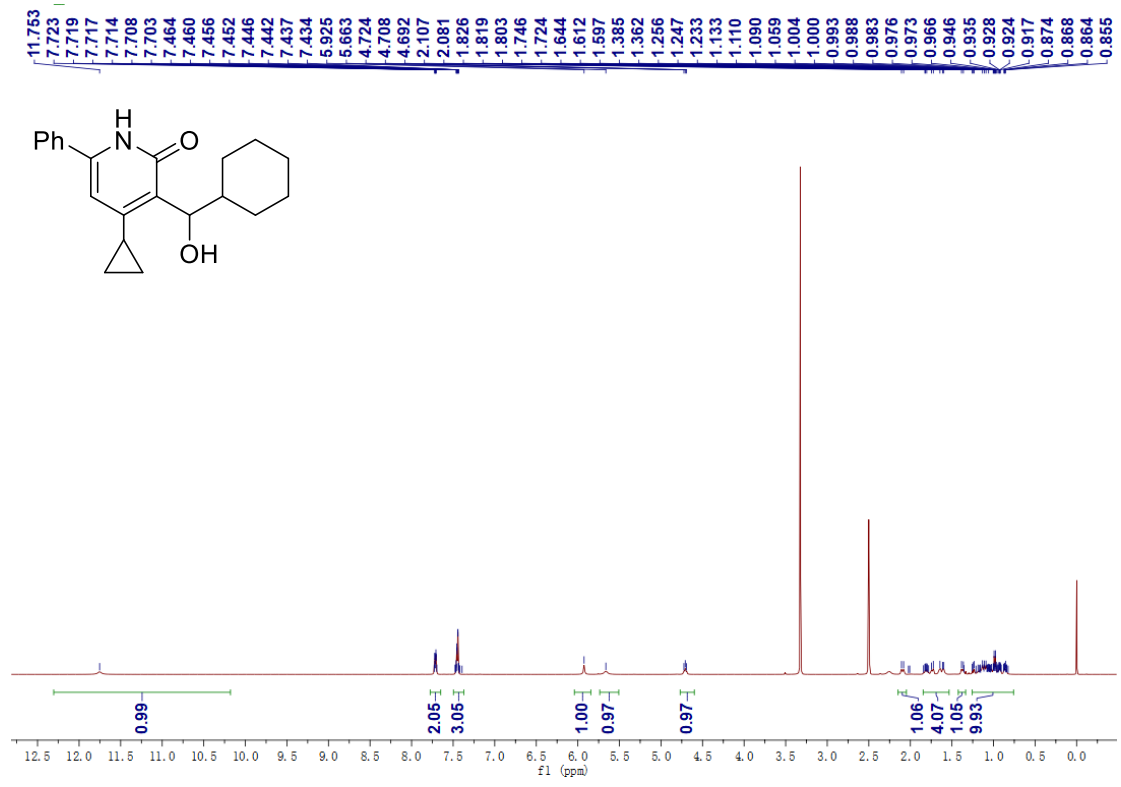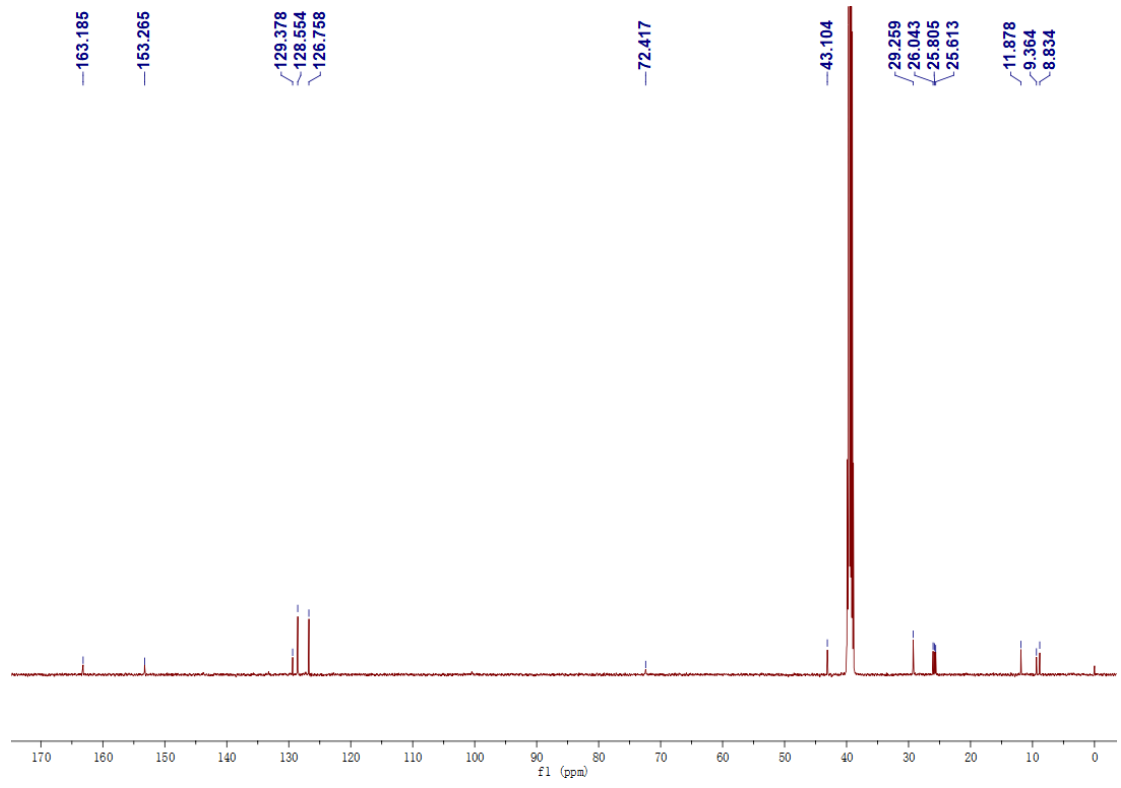

tert-butyl

4-((4-cyclopropyl-2-oxo-6-phenyl-1,2-dihydropyridin-3-

yl)(hydroxy)methyl)piperidine-1-carboxylate (3n)

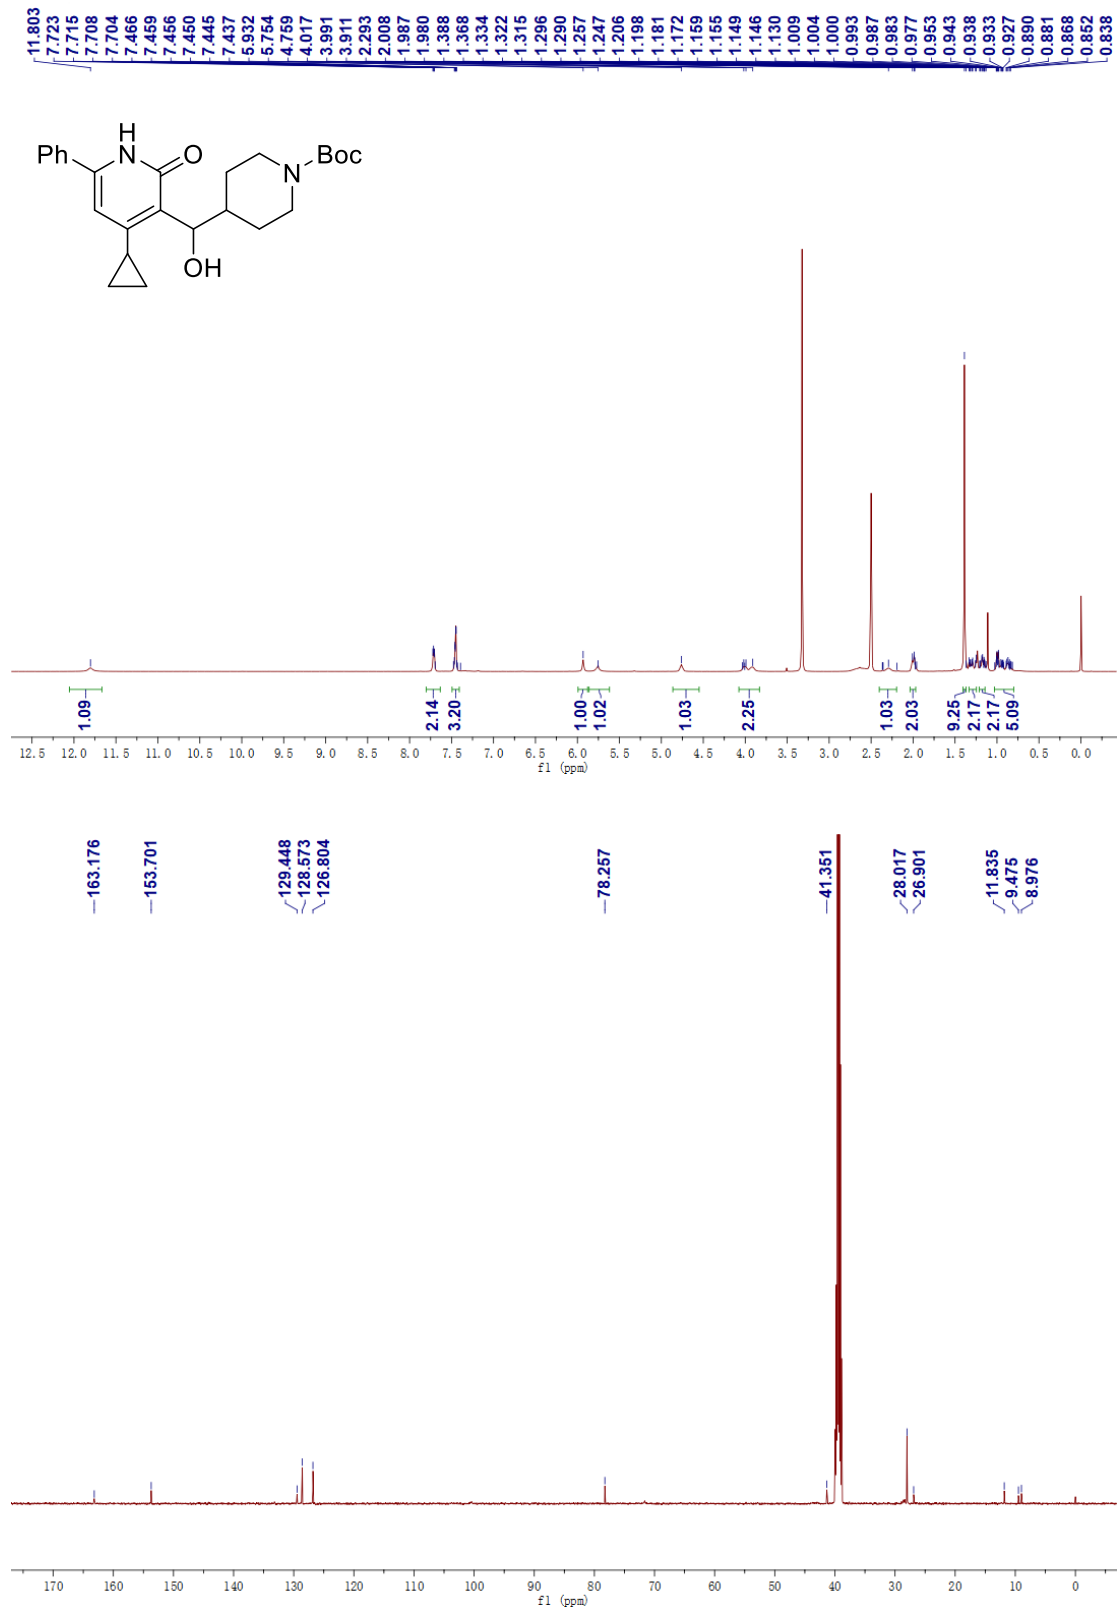

**3-cyclopropyl-3-(furan-3-yl(hydroxy)methyl)-6-phenylpyridin-2(1H)-one (3o)**

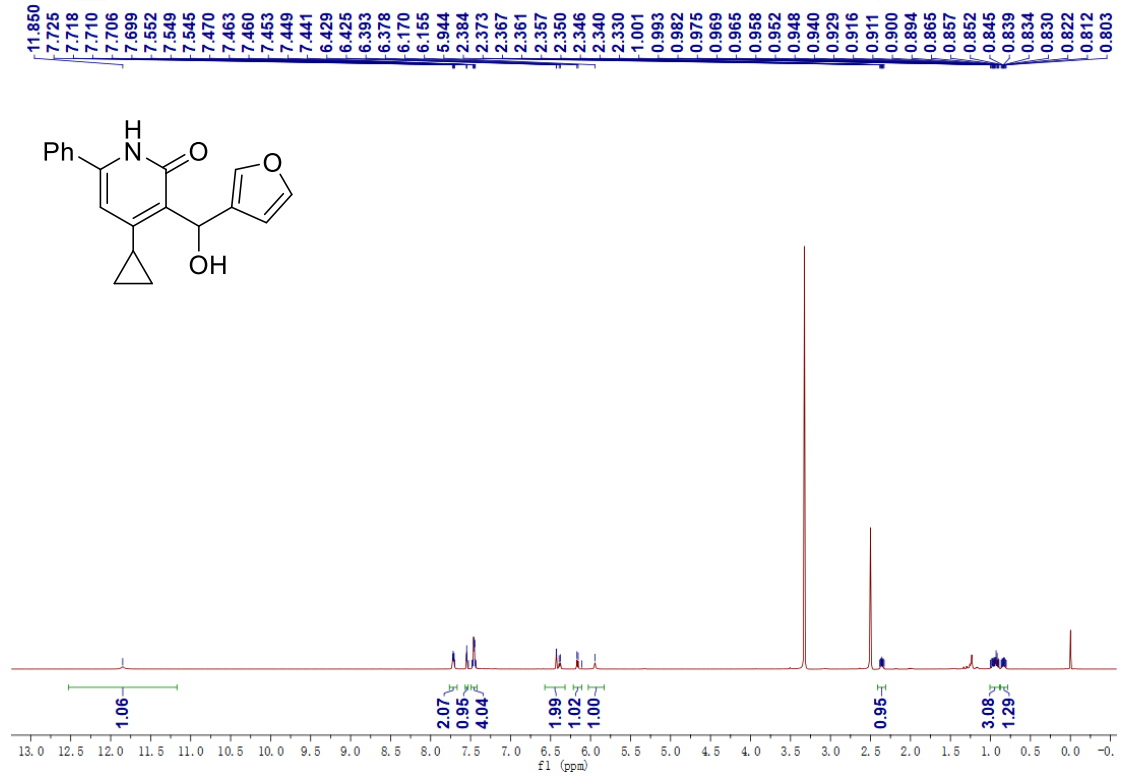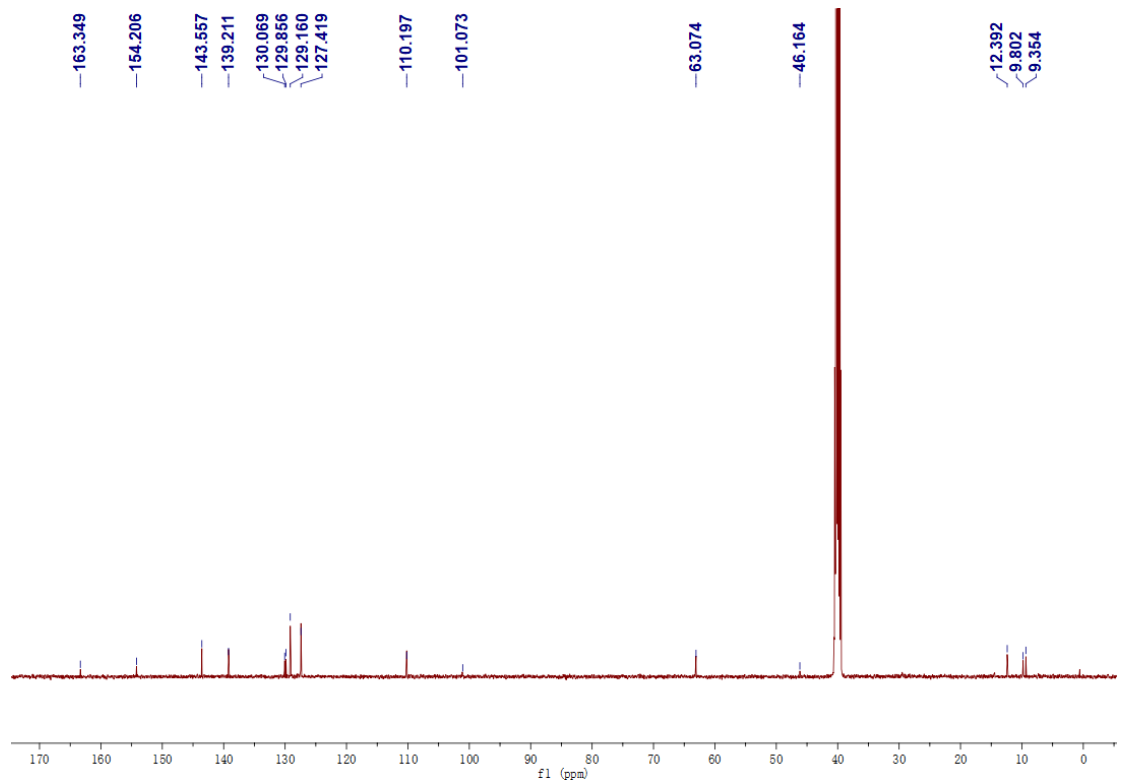



**3-cyclopropyl-3-(hydroxy(naphthalen-2-yl)methyl)-6-phenylpyridin-2(1H)-one (3p)**

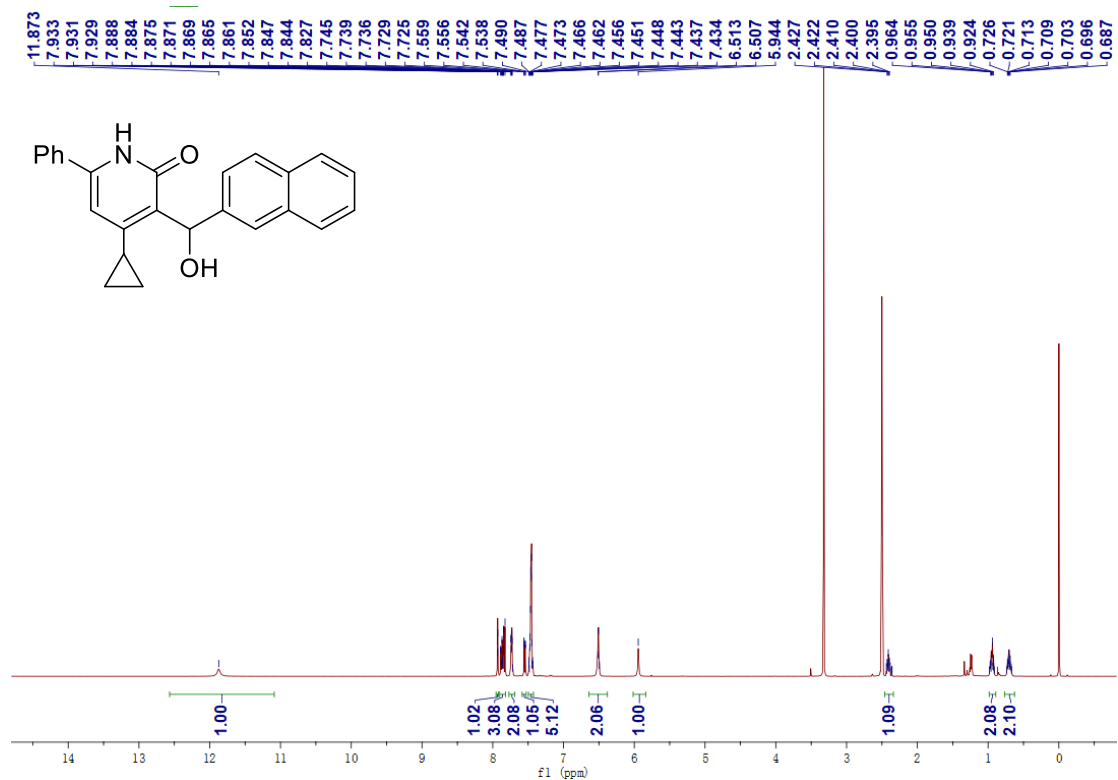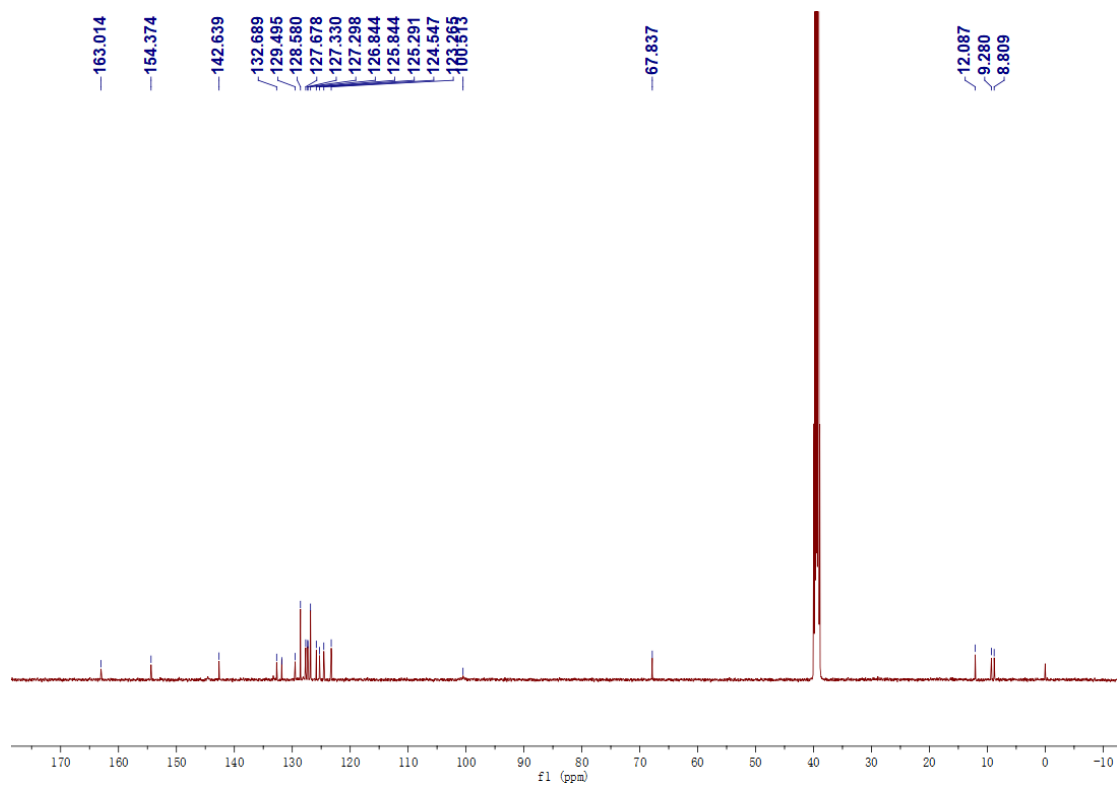

4-cyclopropyl-3-(hydroxy(thiophen-3-yl)methyl)-6-phenylpyridin-2(1H)-one (3q)

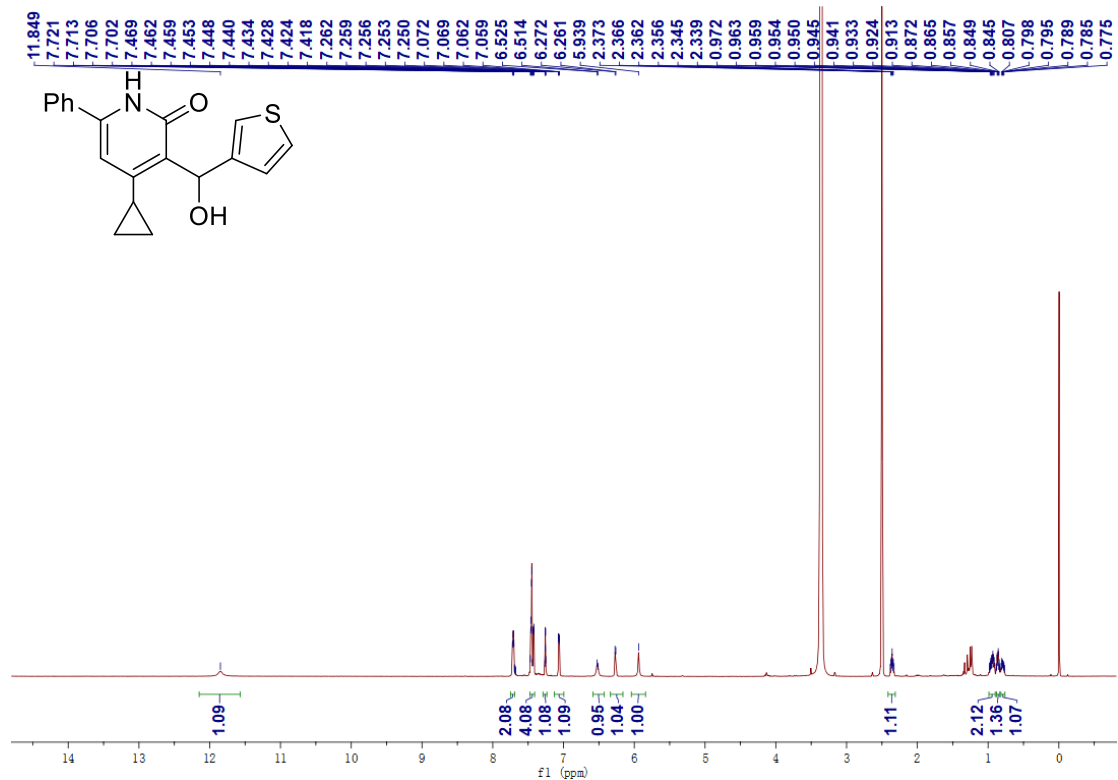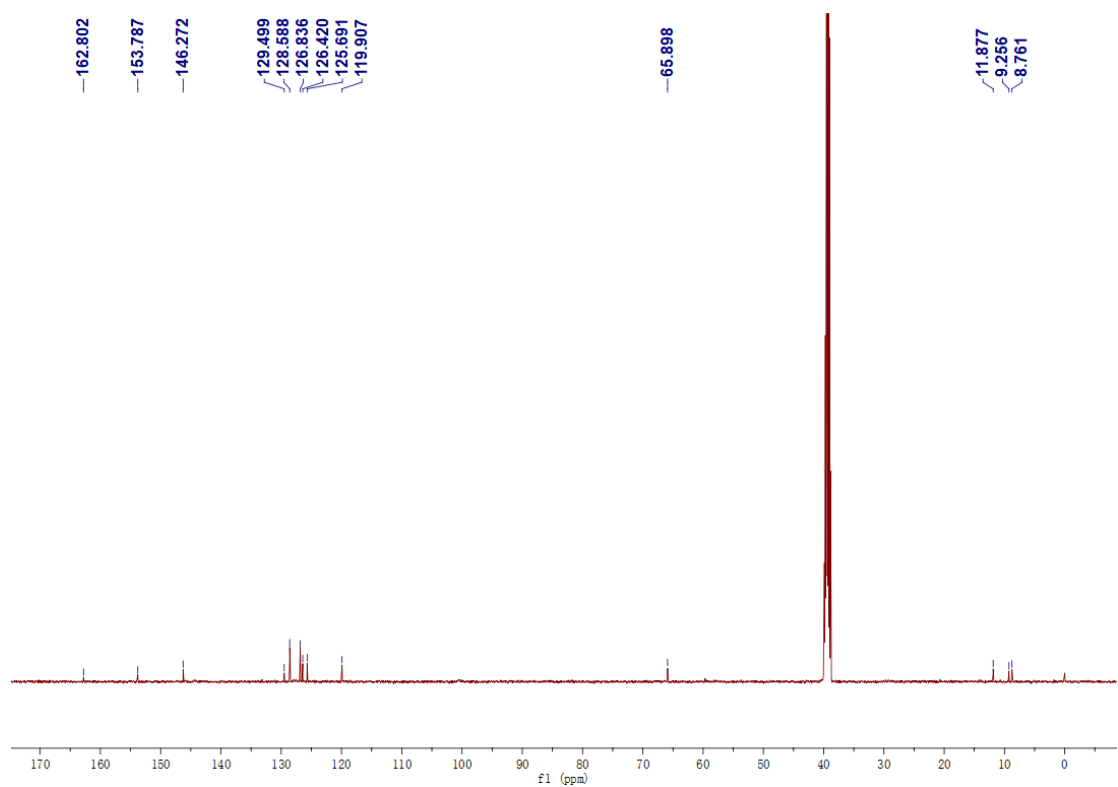

4-cyclopropyl-3-(1-hydroxy-1-phenylethyl)-6-phenylpyridin-2(1H)-one (3r)

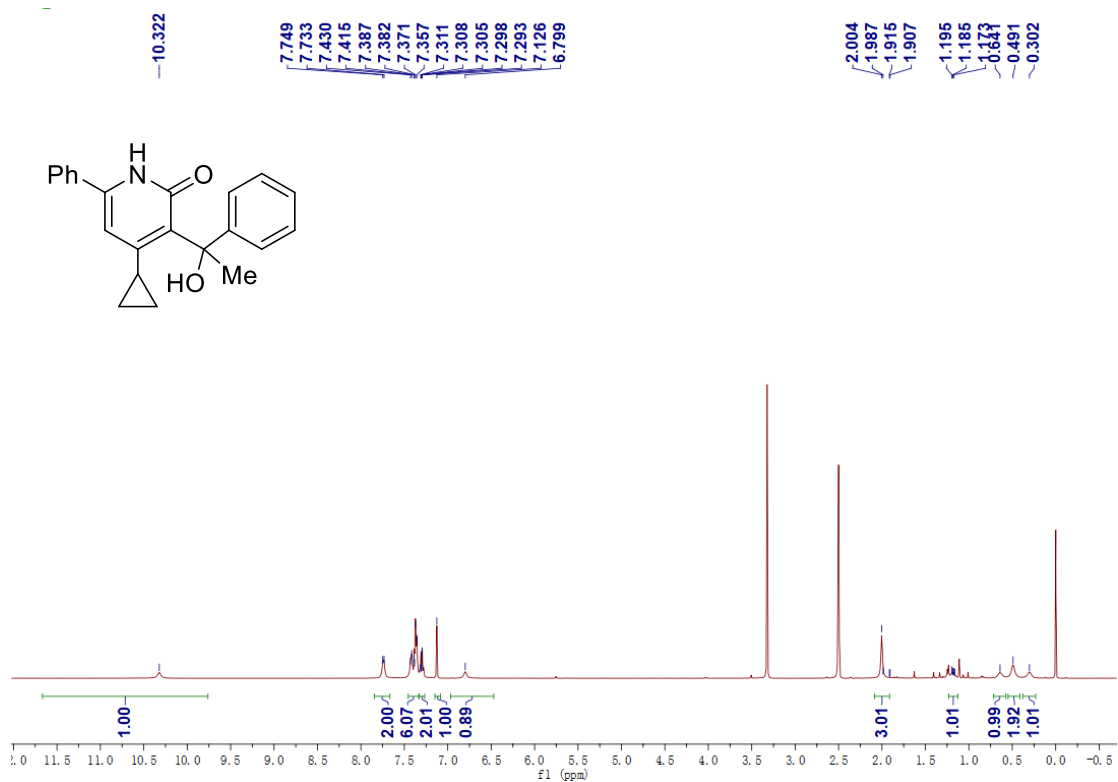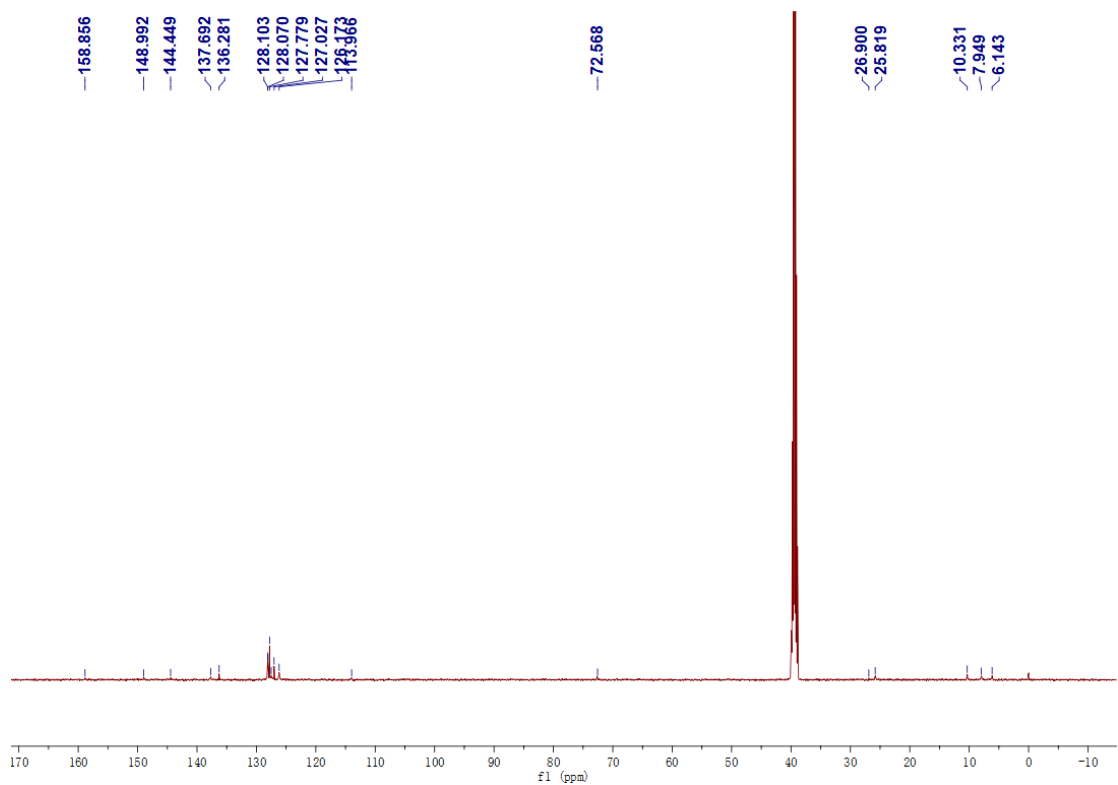

4-cyclopropyl-3-(1-hydroxycyclobutyl)-6-phenylpyridin-2(1H)-one (3s)

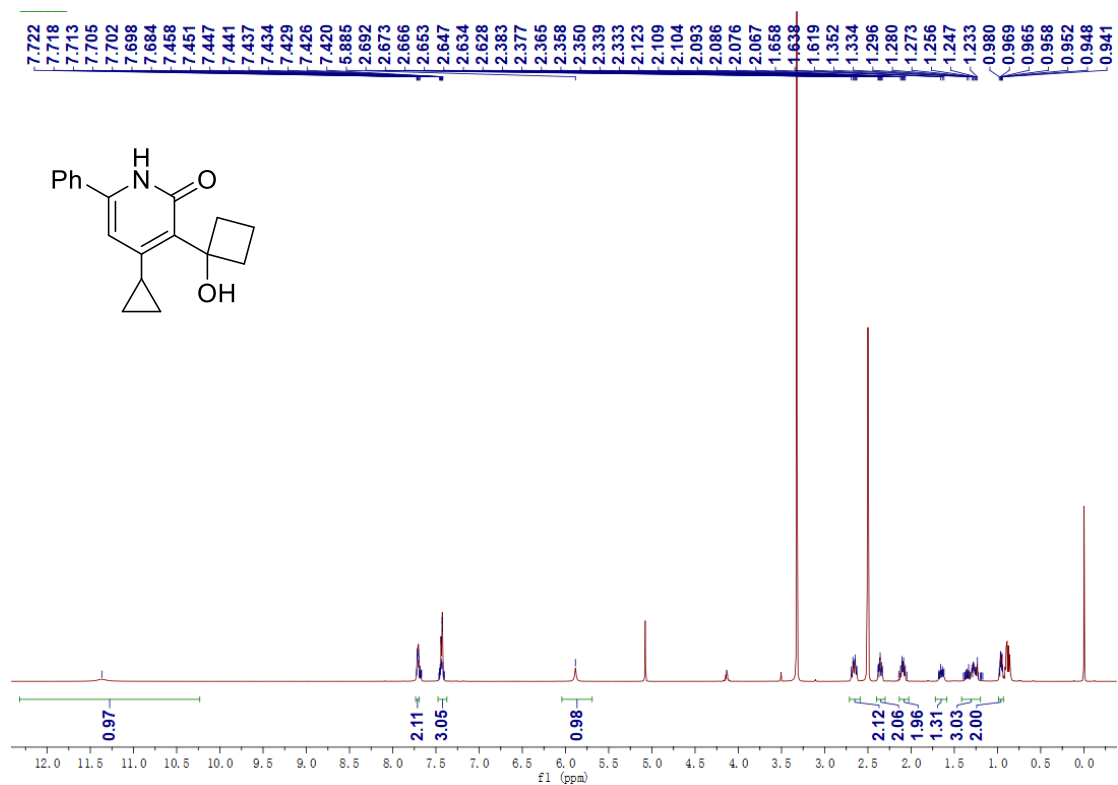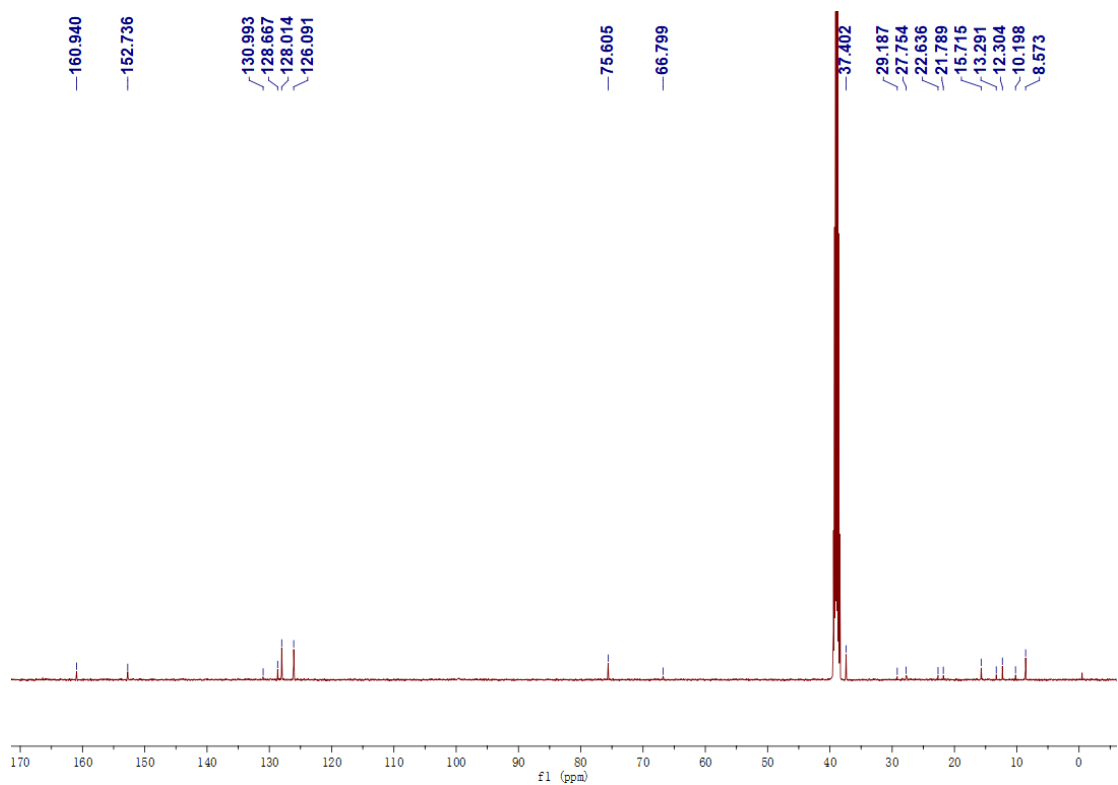

4-cyclopropyl-3-(1-hydroxycyclopentyl)-6-phenylpyridin-2(1H)-one (3t)

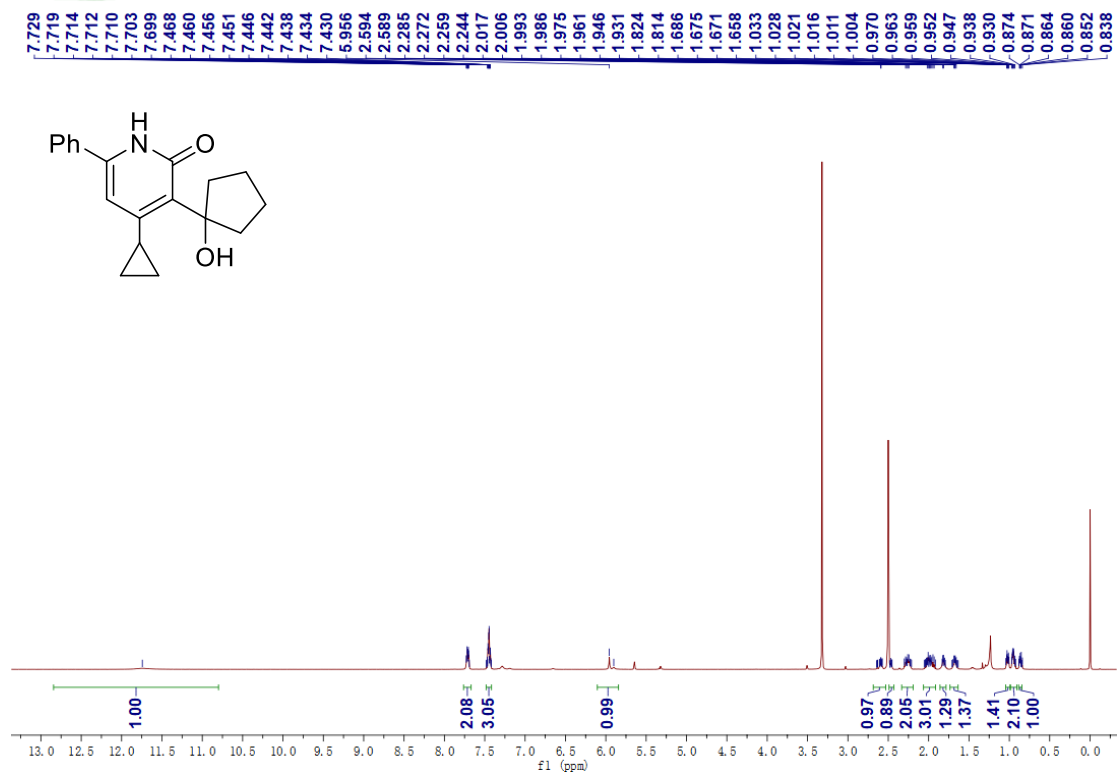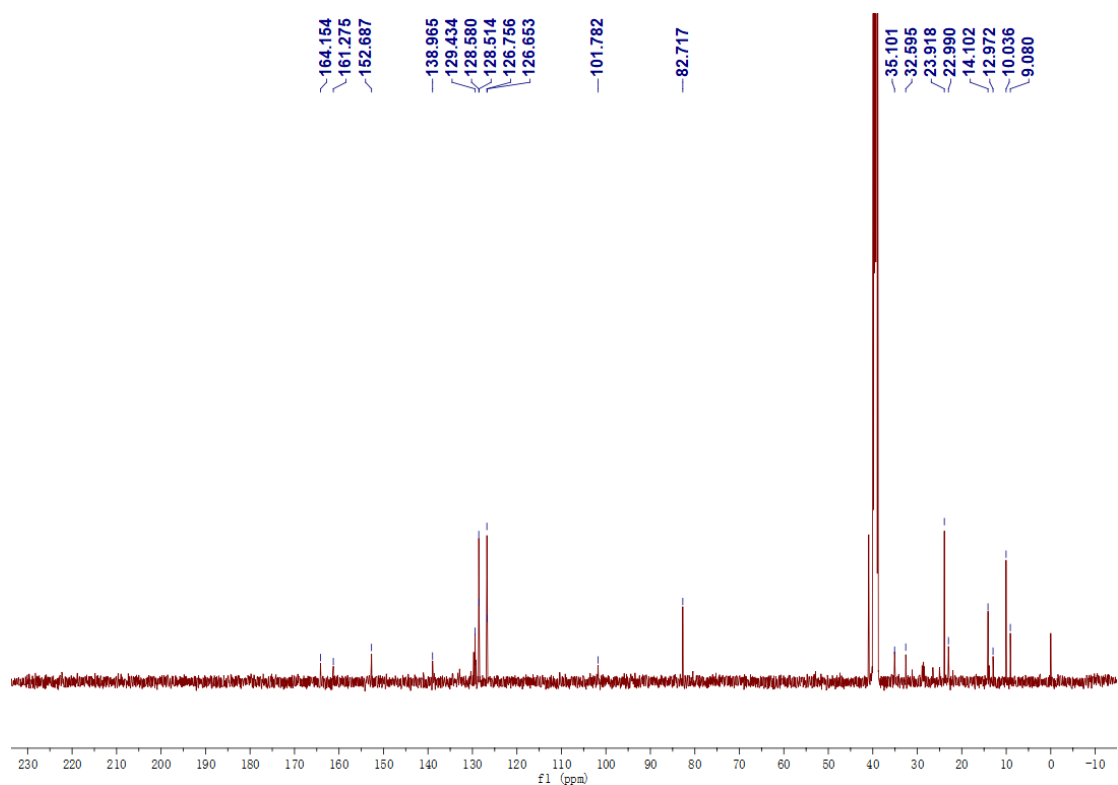

4-cyclopropyl-3-(1-hydroxycyclohexyl)-6-phenylpyridin-2(1H)-one (3u)

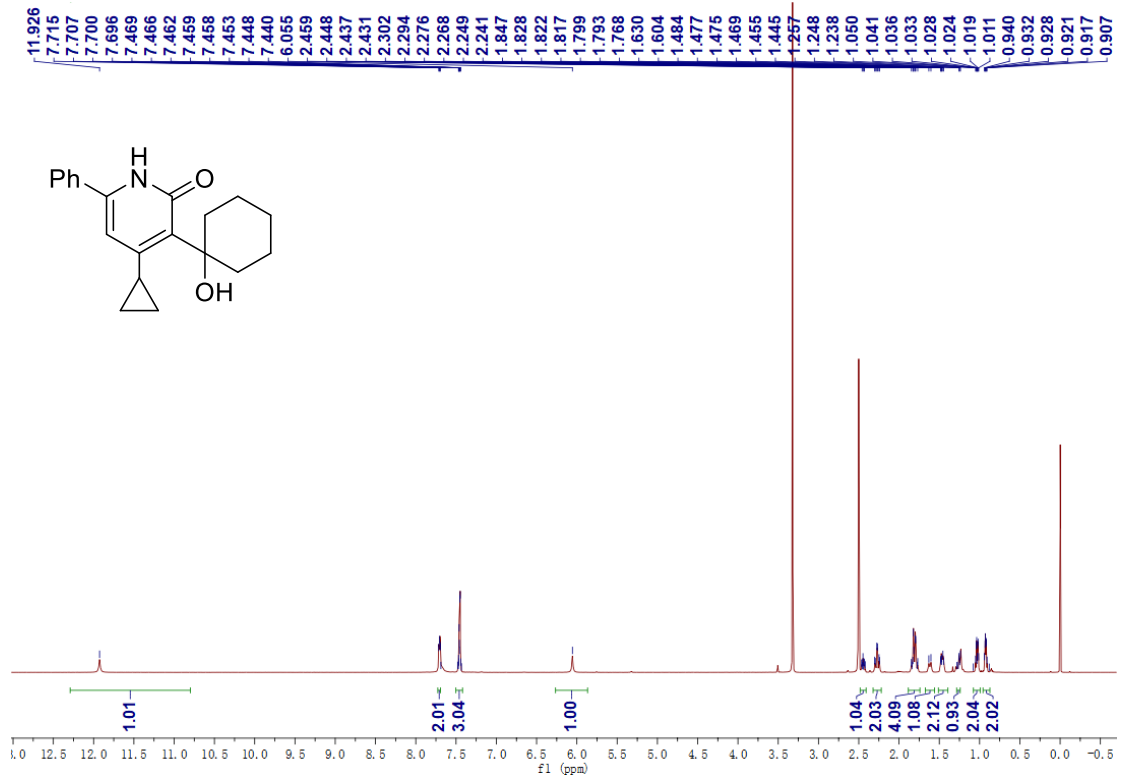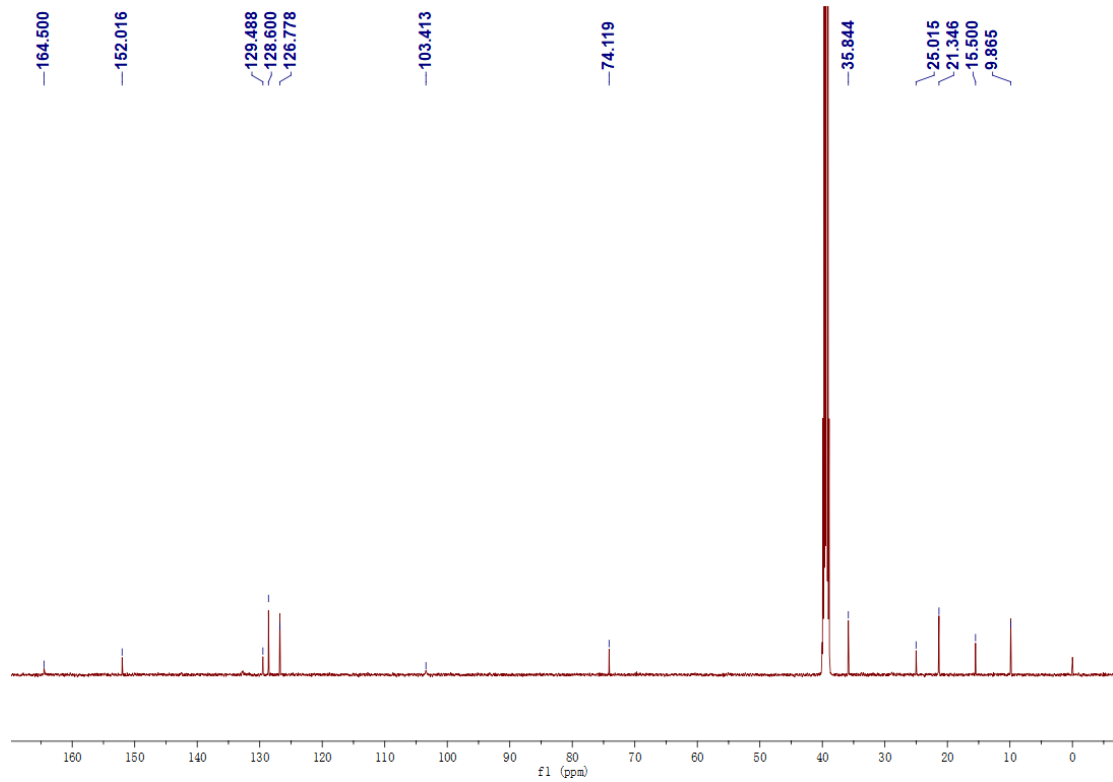

**3-(hydroxy(phenyl)methyl)-4,6-diphenylpyridin-2(1H)-one (3v)**

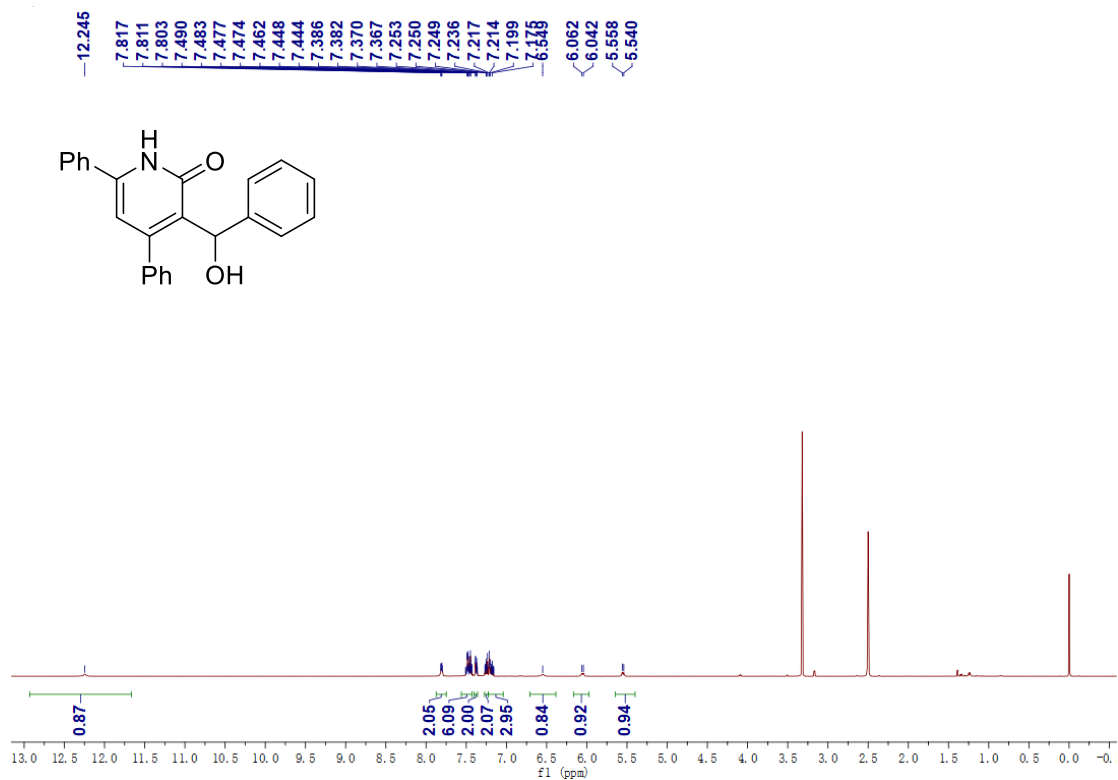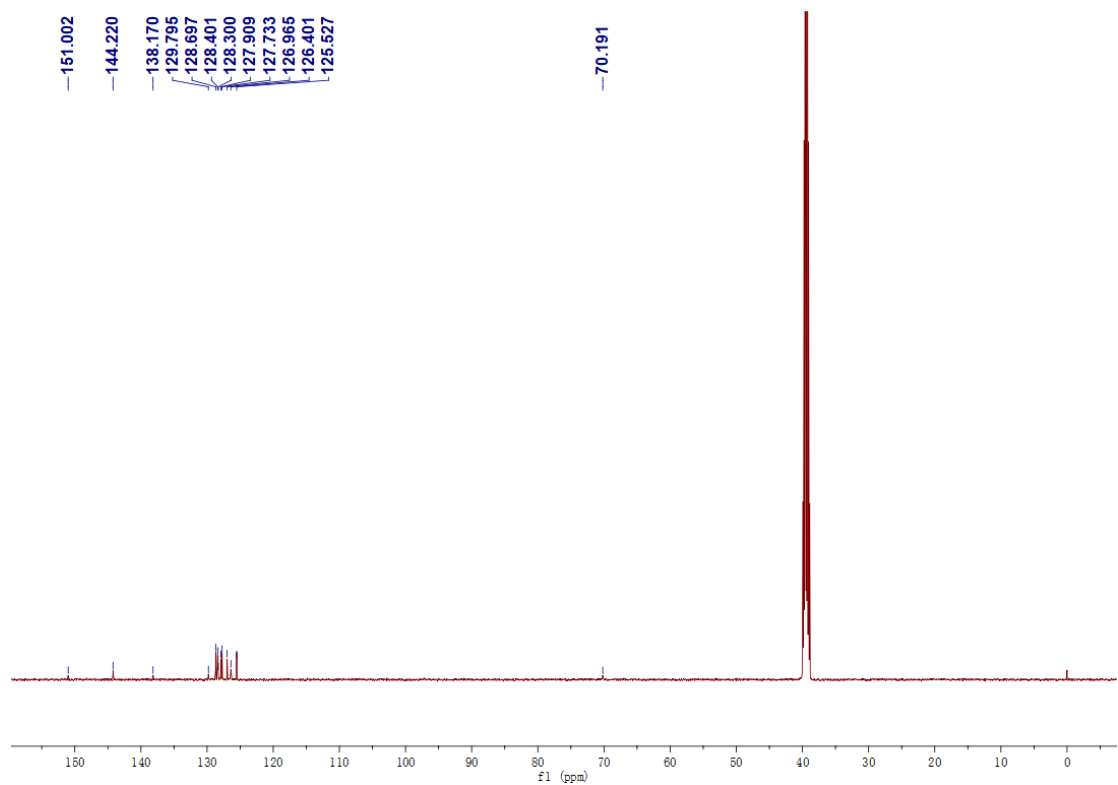

3-(hydroxy(phenyl)methyl)-4-methyl-6-phenylpyridin-2(1H)-one (3w)

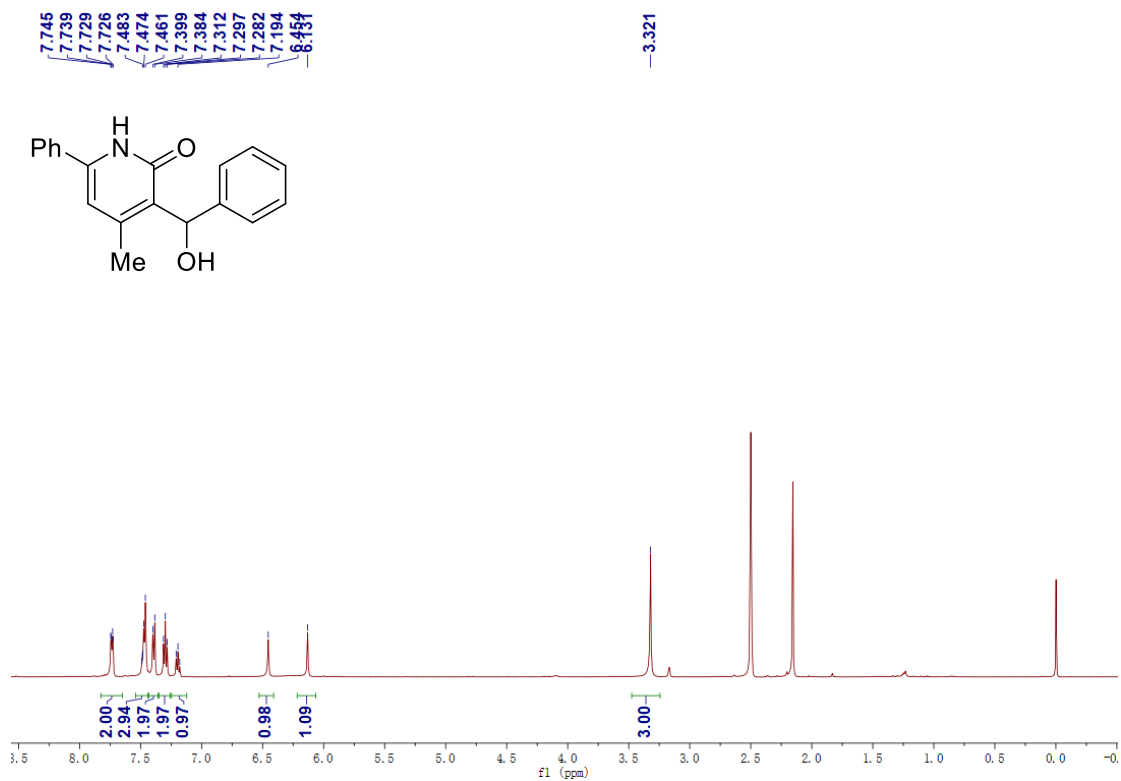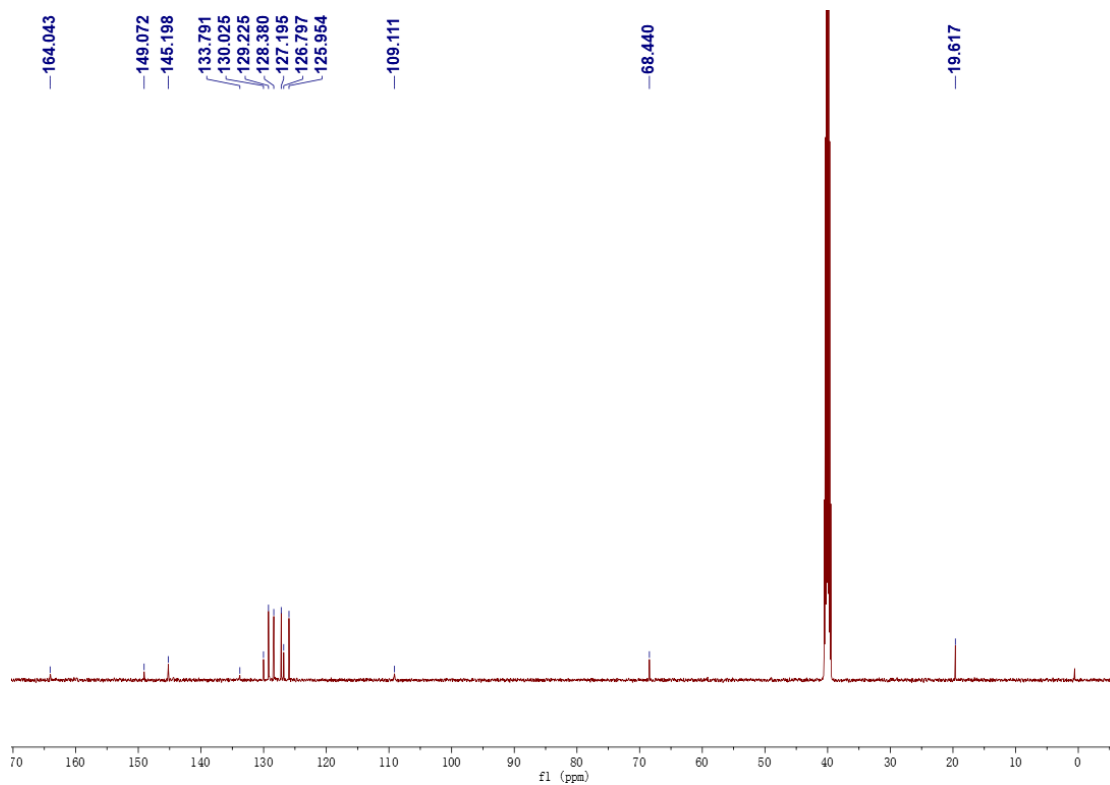



4-butyl-3-(hydroxy(phenyl)methyl)-6-phenylpyridin-2(1H)-one (3x)

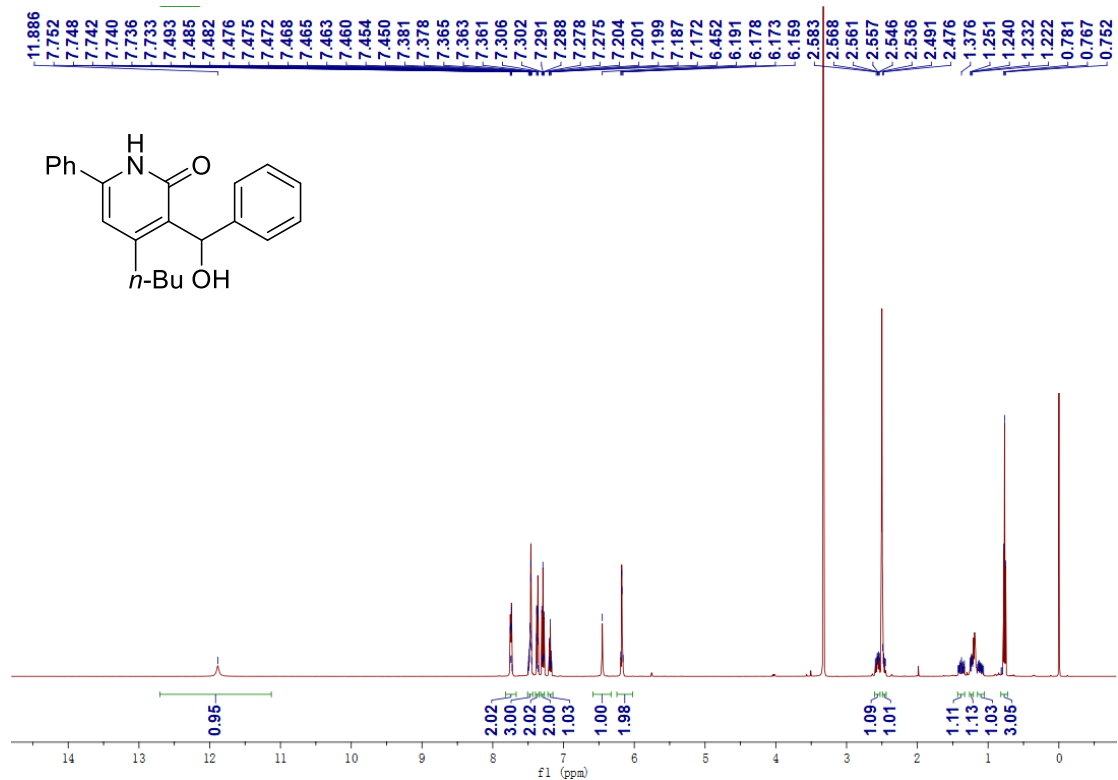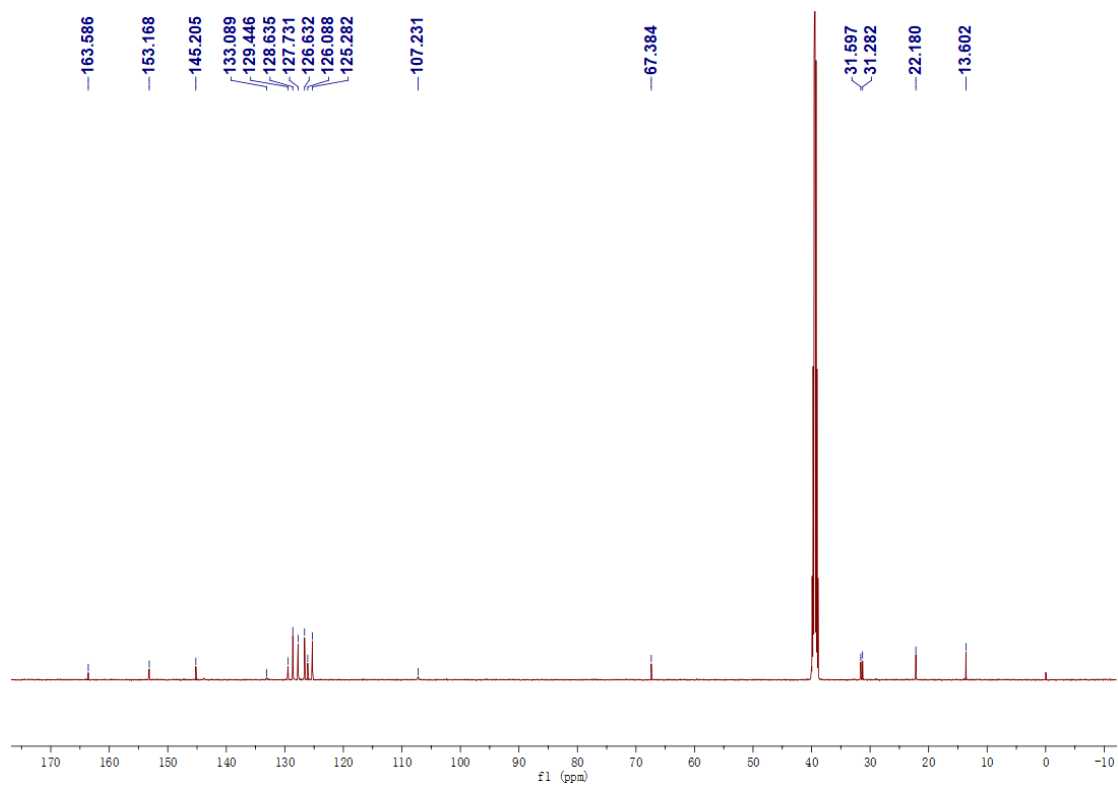

**3-(hydroxy(phenyl)methyl)-4-methyl-6-(p-tolyl)pyridin-2(1H)-one (3y)**

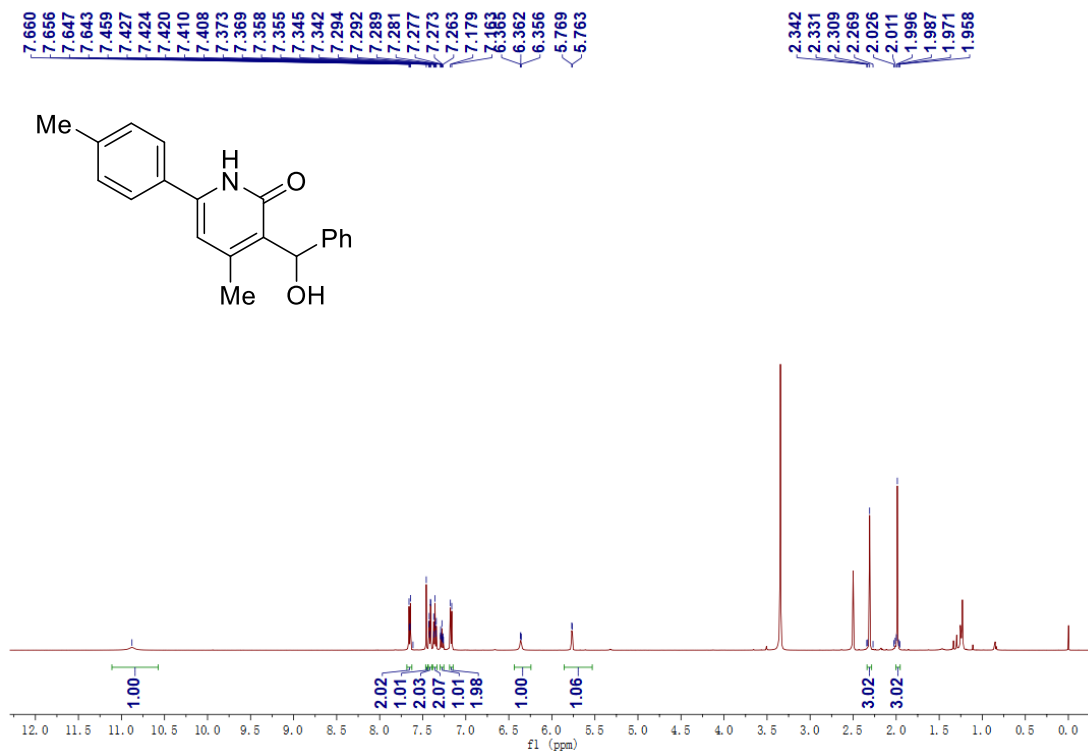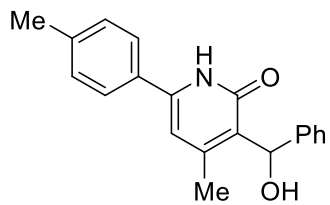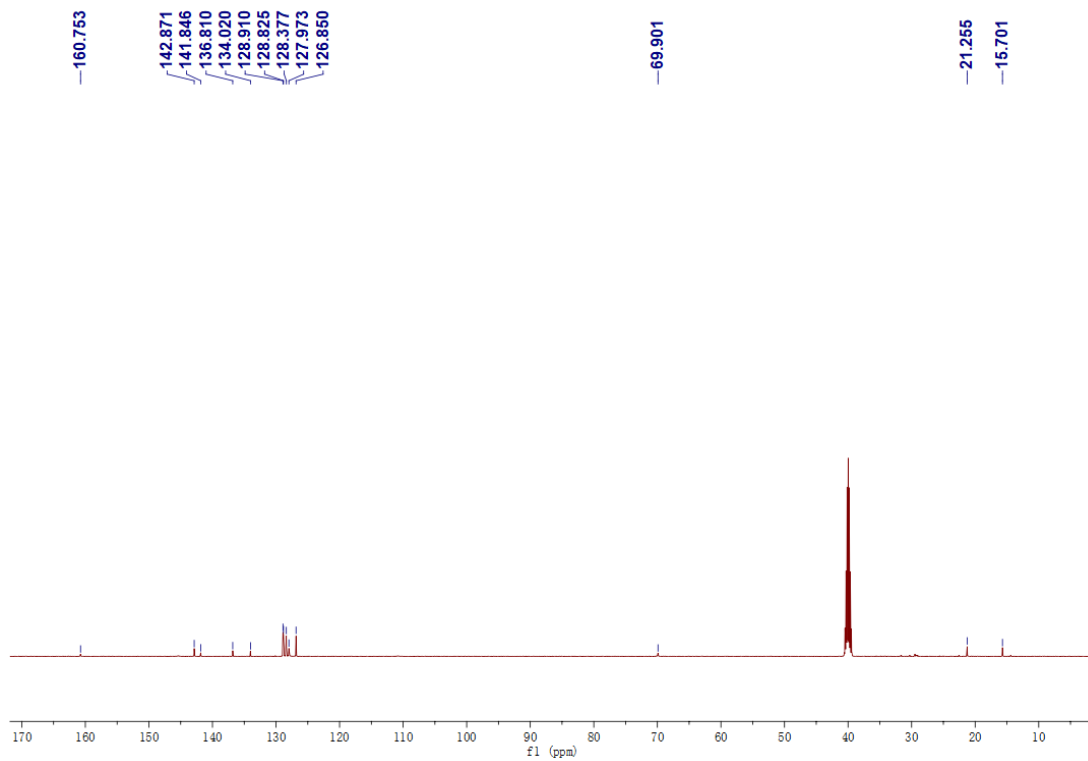

**6-(4-bromophenyl)-3-(hydroxy(phenyl)methyl)-4-methylpyridin-2(1H)-one (3z)**

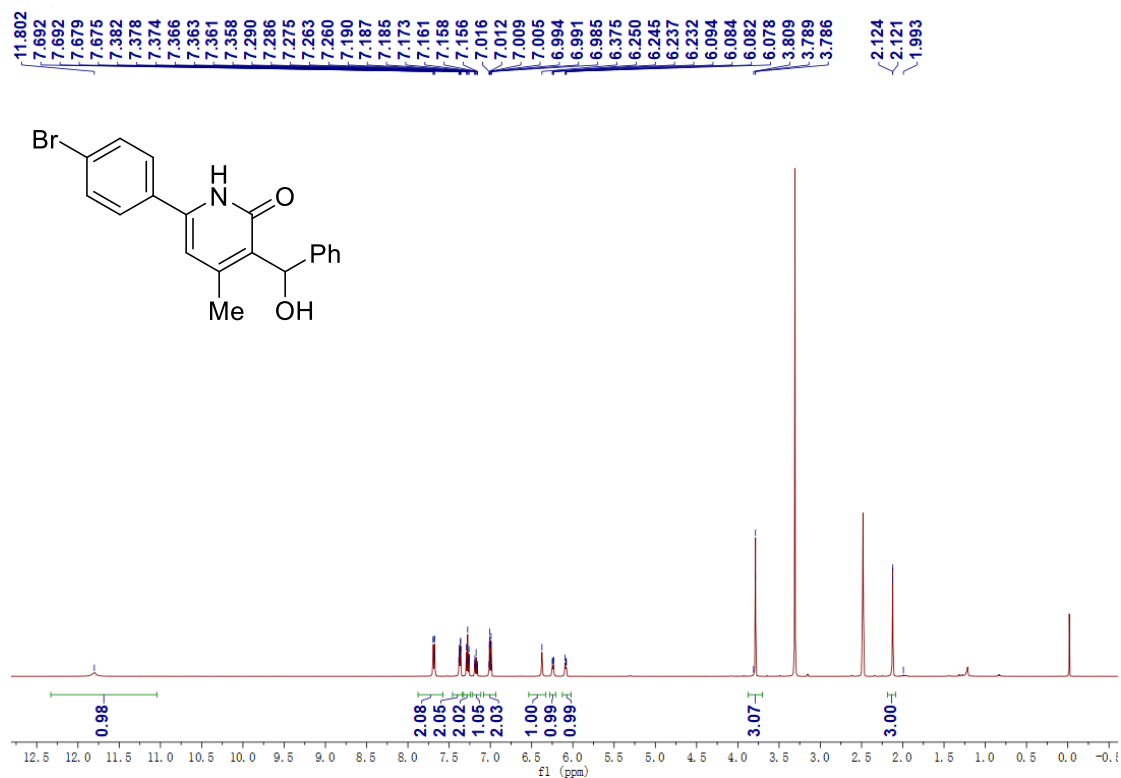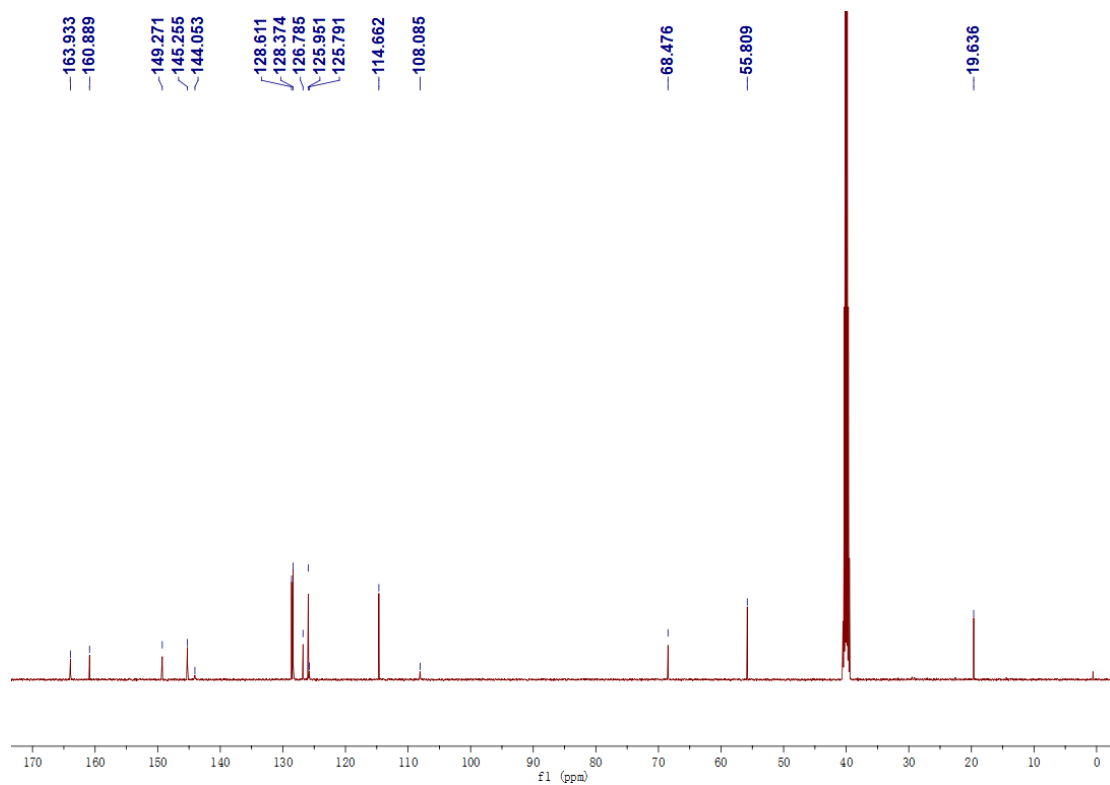

**3-(hydroxy(phenyl)methyl)-6-(4-methoxyphenyl)-4-methylpyridin-2(1H)-one (3za)**

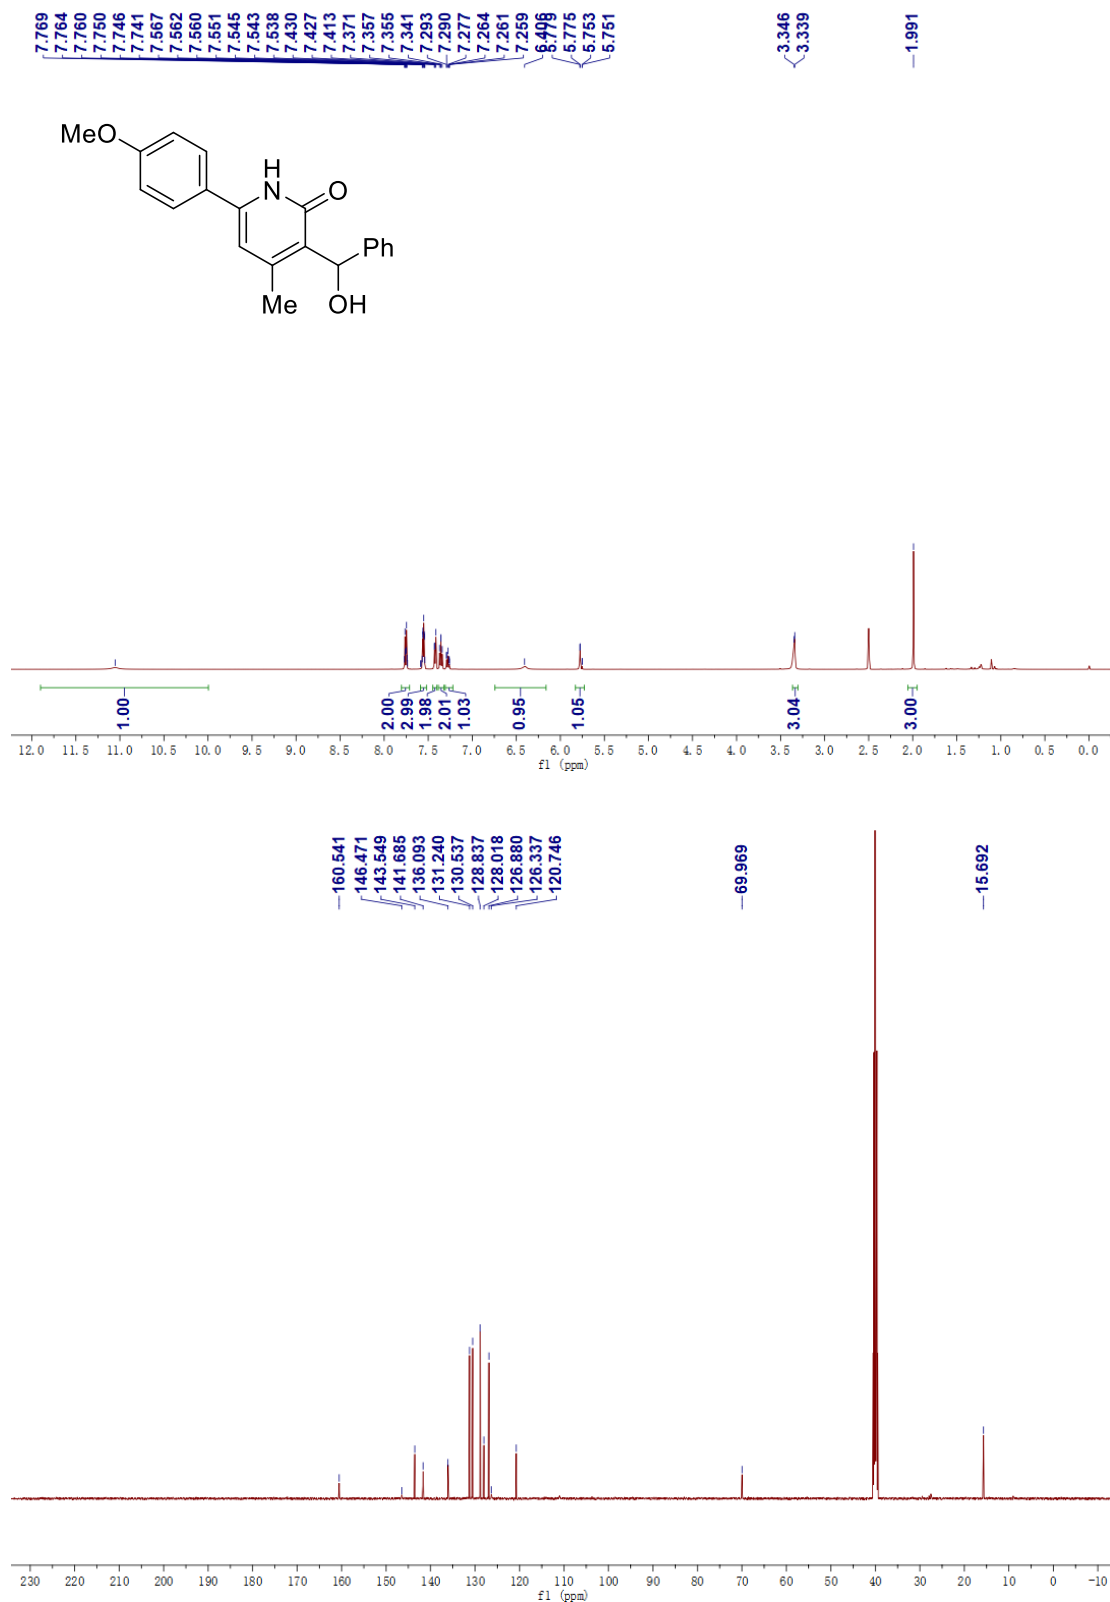

3-(hydroxy(phenyl)methyl)-4-methyl-6-(naphthalen-1-yl)pyridin-2(1H)-one (3zb)

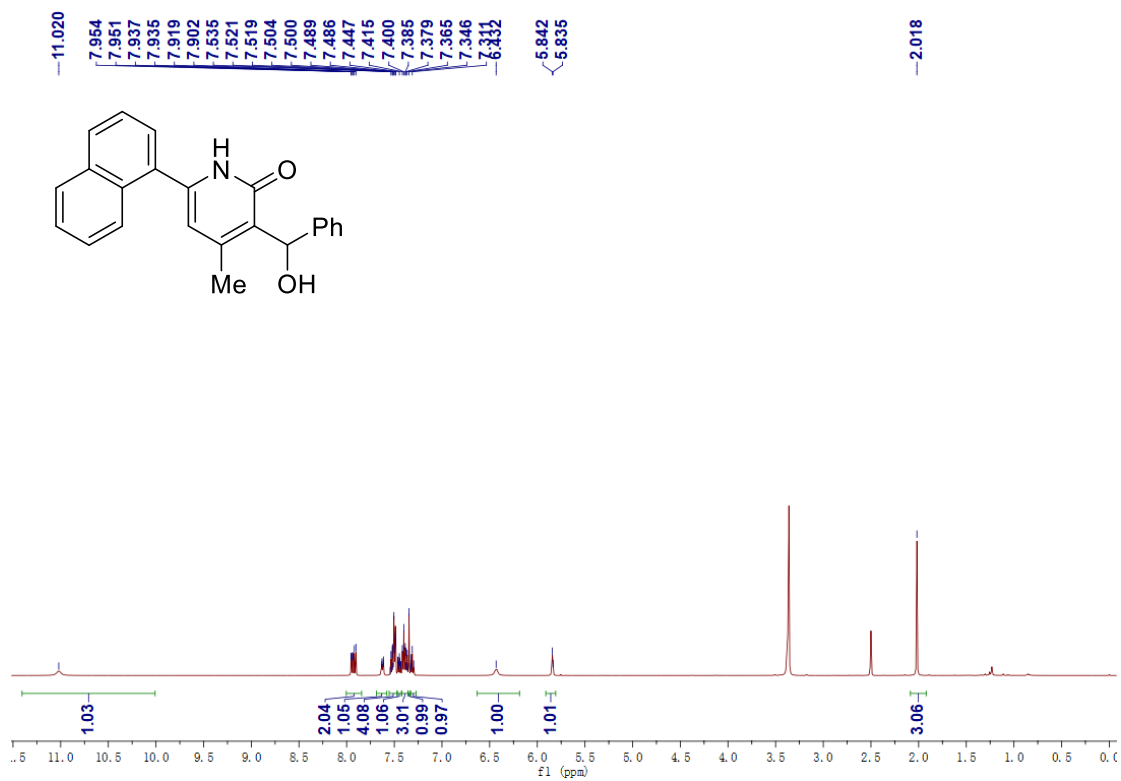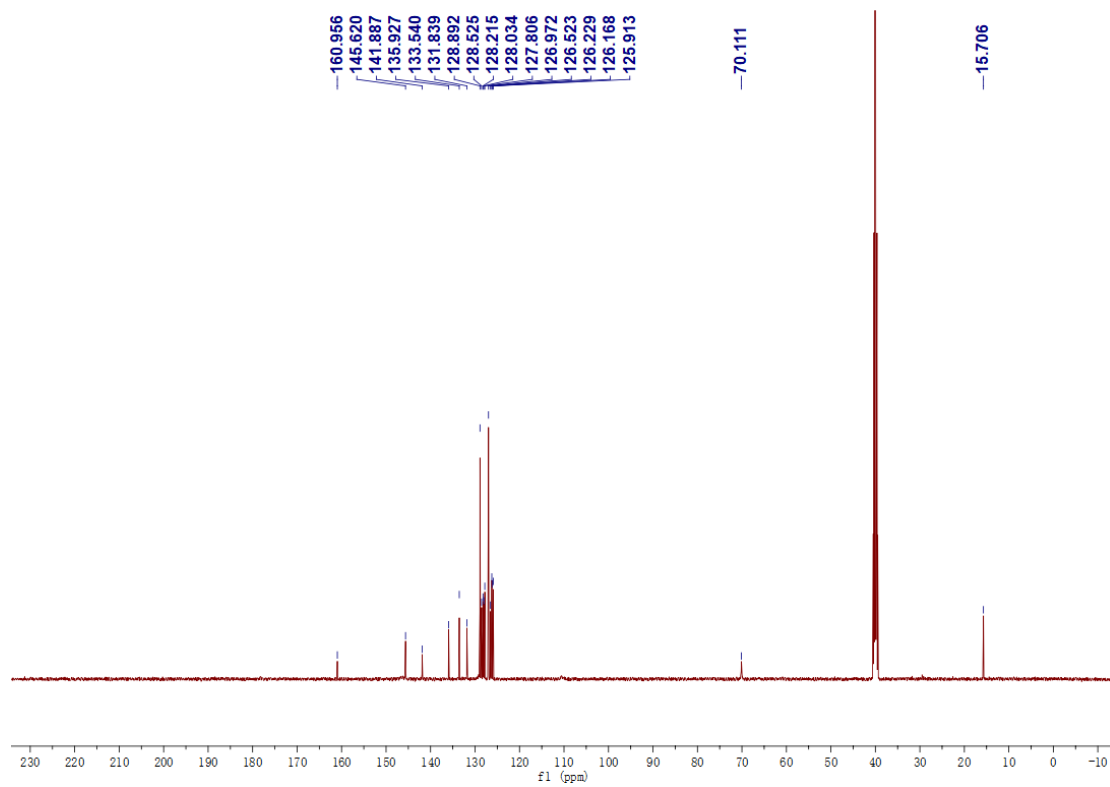

**3-benzyl-4-cyclopropyl-6-phenylpyridin-2(1H)-one (4a)**

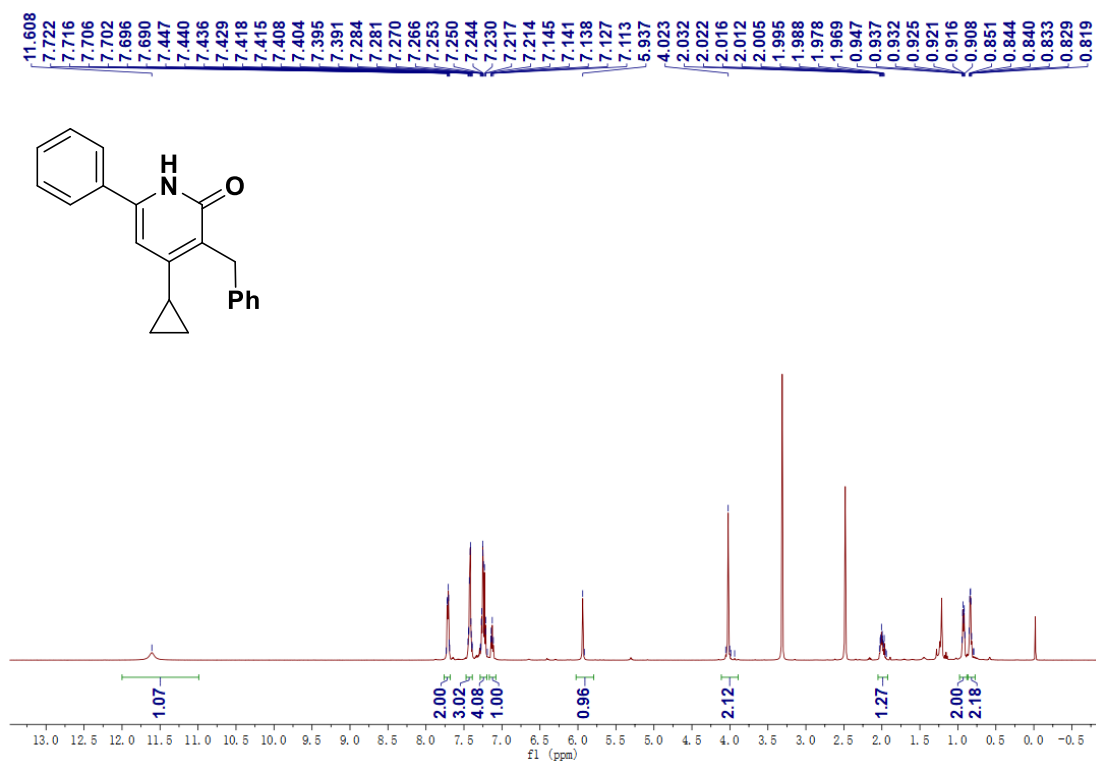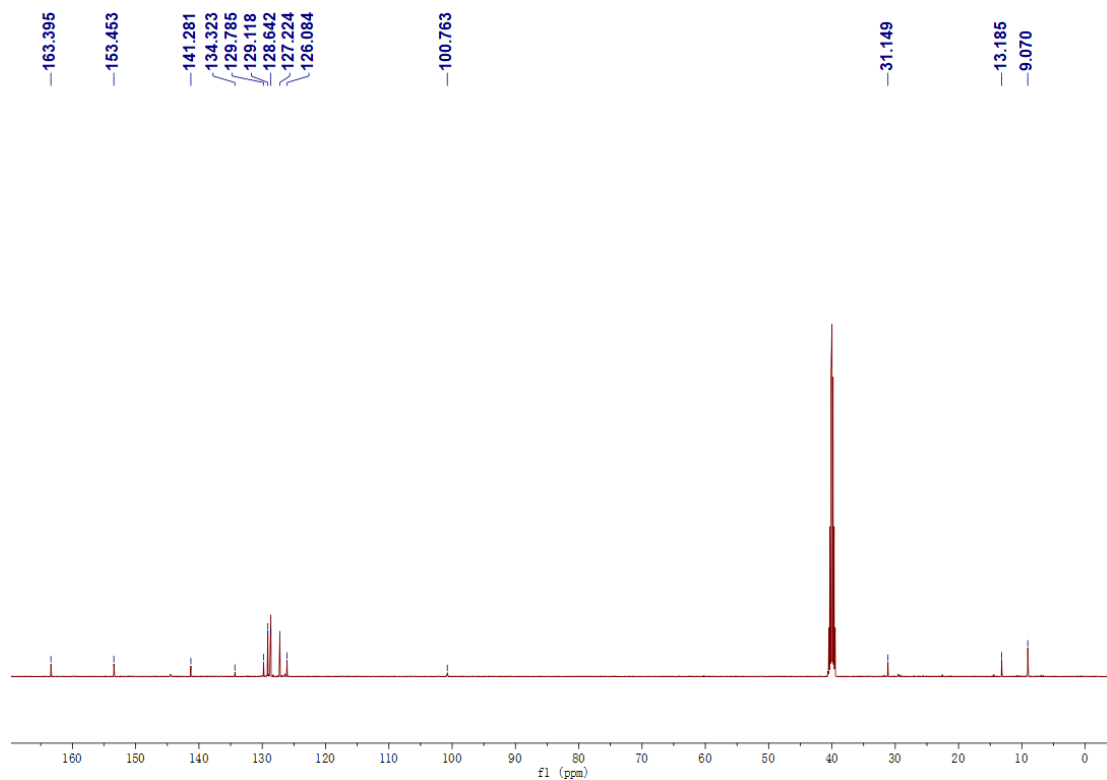

### 4-benzyl-3-cyclopropyl-6-phenylpyridin-2(1H)-one (4a')

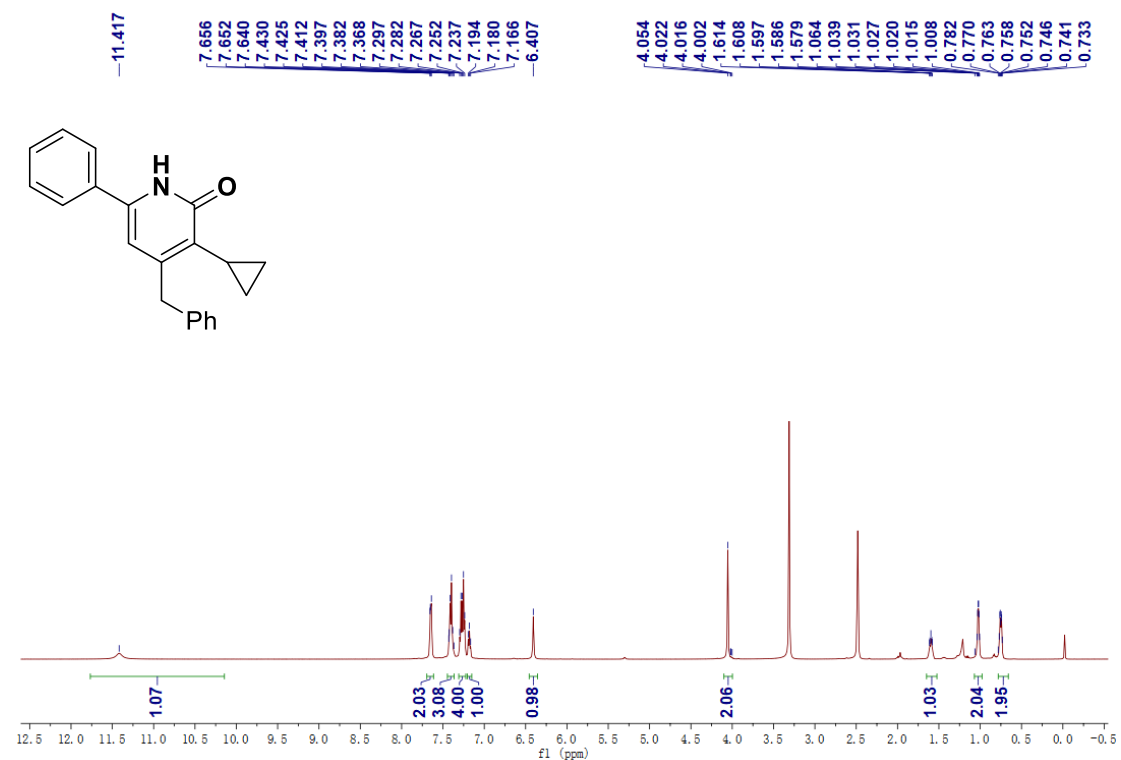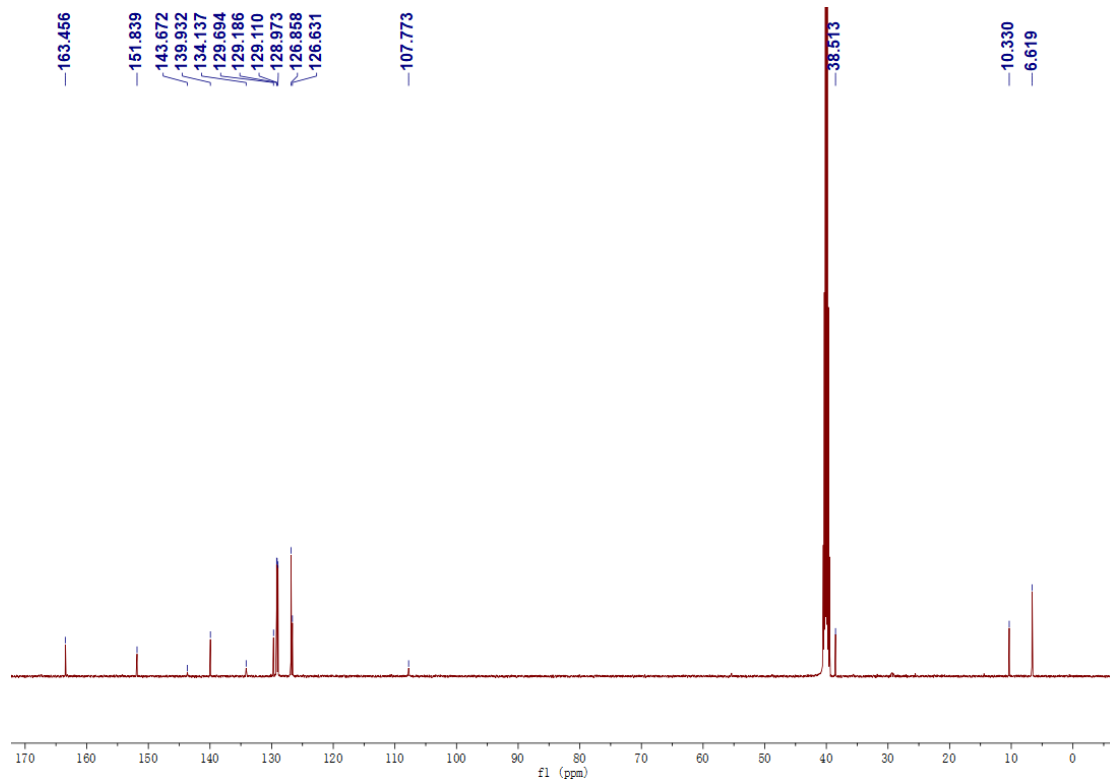

### 3-benzoyl-4-cyclopropyl-6-phenylpyridin-2(1H)-one (5a)

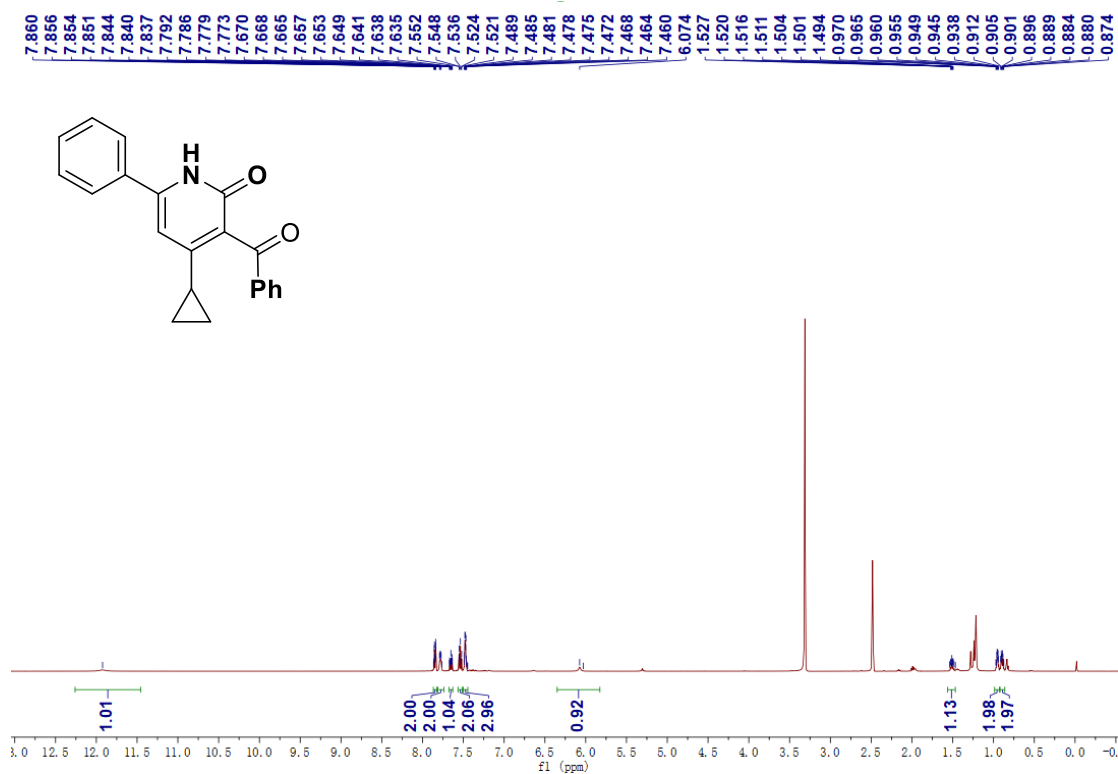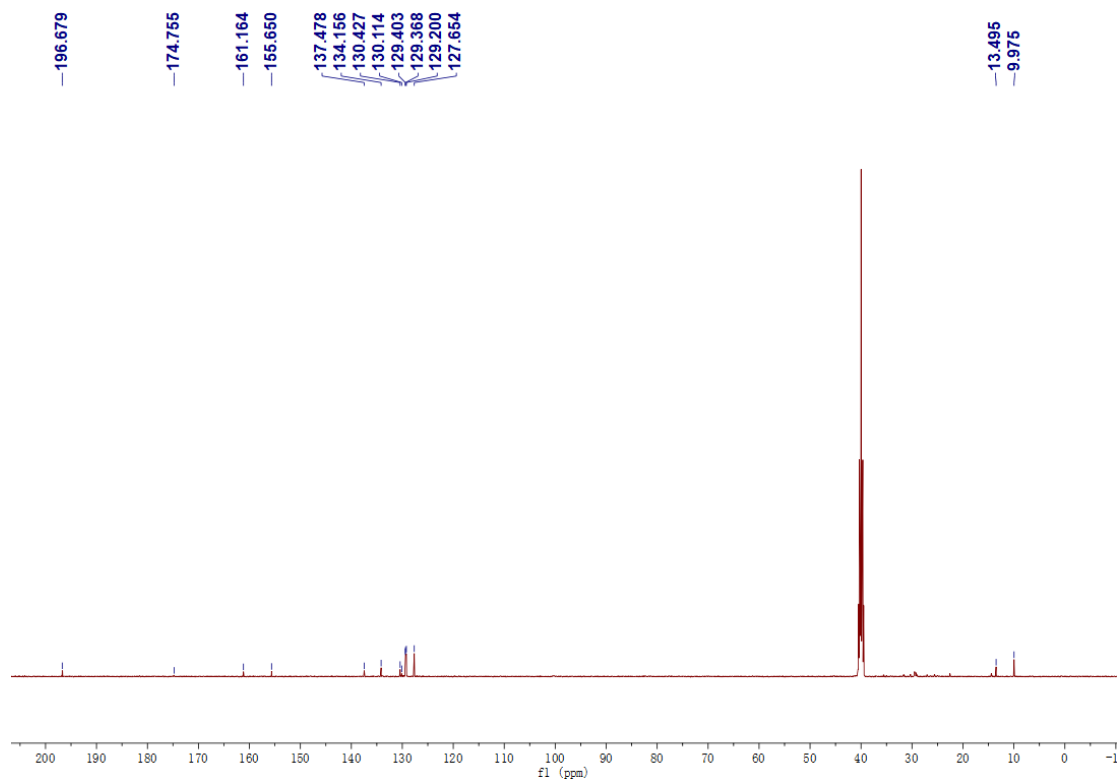



**4-benzoyl-3-cyclopropyl-6-phenylpyridin-2(1H)-one (5a')**

7.905  
7.902  
7.889  
7.886  
7.782  
7.777  
7.774  
7.767  
7.763  
7.756  
7.738  
7.735  
7.732  
7.720  
7.717  
7.708  
7.705  
7.703  
7.607  
7.604  
7.591  
7.576  
7.475  
7.472  
7.465  
7.457  
7.453  
7.447  
7.443  
7.435  
7.435  
6.497  
1.421  
1.410  
1.404  
1.399  
1.393  
1.387  
1.382  
1.376  
1.365  
0.904  
0.896  
0.892  
0.885  
0.880  
0.873  
0.864  
0.851  
0.837  
0.578  
0.571  
0.566  
0.561  
0.558  
0.554  
0.549  
0.541

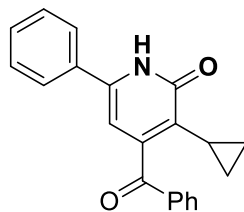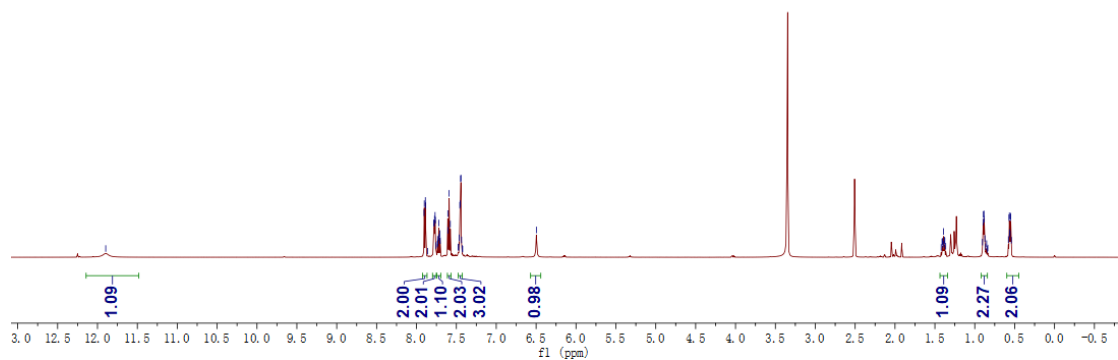

—196.867  
—163.258  
—149.138  
—145.162  
—135.976  
—134.789  
—133.681  
—130.111  
—129.925  
—129.641  
—129.230  
—127.169  
—102.930  
—12.085  
—6.327

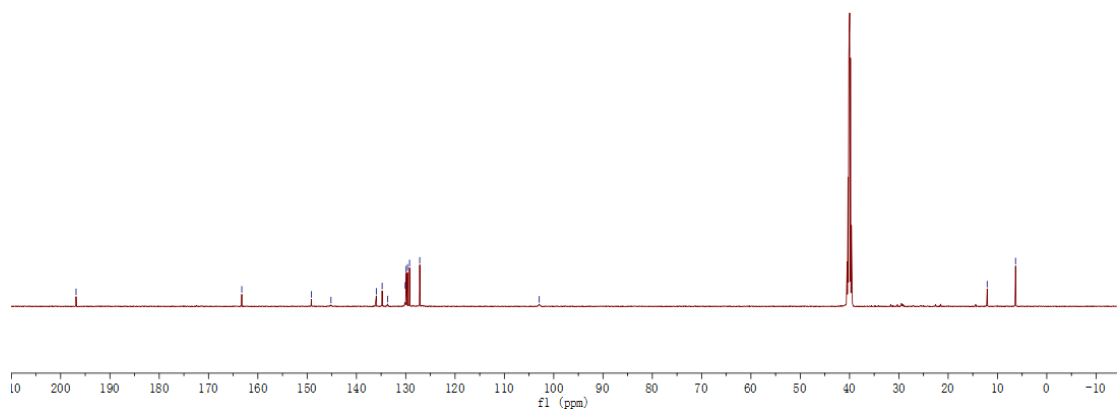

Supplement: d3qo00469d1.pdf [file d3qo00469d1.pdf]
